# Supplementary material for: Gradient isoselective ring-opening polymerization of racemic cyclic diolide driven by chiral phosphoric acid catalysis
Source: Royal Society of Chemistry journal article supplement (doi:10.1039/d2py00955b), 2022-01-01
Supplement: d2py00955b1.pdf [file d2py00955b1.pdf]

## Supporting Information

### Gradient Ioselective Ring-Opening Polymerization of Racemic Cyclic Diolide Driven by Chiral Phosphoric Acid Catalysis

Junbao Liu<sup>1</sup>, Jianqun Wang<sup>2,3\*</sup>, Maosheng Li<sup>2\*</sup>, Youhua Tao<sup>2,3</sup>

#### Affiliations:

<sup>1</sup>China-Japan Union Hospital of Jilin University; Xiantai Street 126, Changchun 130000, People's Republic of China.

<sup>2</sup>Key Laboratory of Polymer Ecomaterials, Changchun Institute of Applied Chemistry, Chinese Academy of Sciences; Renmin Street 5625, Changchun 130022, People's Republic of China.

<sup>3</sup>University of Science and Technology of China; Hefei 230026, People's Republic of China.

\*Corresponding author. Email: [wangjq@ciac.ac.cn](mailto:wangjq@ciac.ac.cn); [msli@ciac.ac.cn](mailto:msli@ciac.ac.cn).

## Table of contents

|                                                                            |     |
|----------------------------------------------------------------------------|-----|
| Materials .....                                                            | S3  |
| Measurements .....                                                         | S3  |
| Synthesis of monomers and polymers: .....                                  | S4  |
| Table S1-3.....                                                            | S5  |
| Statistical analyses for polymer samples (Table S4-5 and Figure S1-6)..... | S7  |
| Figure S7-14 .....                                                         | S11 |
| NMR spectra of synthesized compounds and polymers (Figure S15-18).....     | S15 |
| Computational methodology .....                                            | S17 |
| Optimized structures (Figure S19).....                                     | S18 |
| Coordinates .....                                                          | S22 |
| Supplementary references.....                                              | S67 |

## Materials

Toluene (TOL) was refluxed with sodium and distilled under nitrogen before use. Chloroform (CHCl<sub>3</sub>) and benzyl alcohol (BnOH) were freshly distilled from CaH<sub>2</sub>. All the Chiral Phosphoric Acids were purchased from DAICEL CHIRAL TECHNOLOGIES. All the other reagents and solvents were purchased from Energy Chemical and used as received without further purification unless otherwise stated.

## Measurements

All room temperature <sup>1</sup>H NMR spectra and <sup>13</sup>C NMR spectra were recorded on a Bruker AV-500 spectrometer and a Bruker AV-600 spectrometer, respectively. <sup>1</sup>H NMR chemical shifts were referenced as follows: δ7.26 ppm for chloroform-*d* (CDCl<sub>3</sub>), δ2.50 ppm for dimethyl sulfoxide-*d*<sub>6</sub> (DMSO-*d*<sub>6</sub>). <sup>13</sup>C NMR chemical shifts were referenced as follows: δ77.16 ppm for chloroform-*d* (CDCl<sub>3</sub>), δ39.52 ppm for dimethyl sulfoxide-*d*<sub>6</sub> (DMSO-*d*<sub>6</sub>). <sup>13</sup>C NMR peak fitting was implemented on software MestReNova-12.0.2.

MALDI-TOF Mass Spectrometry conditions were as follows. Instrument type: Bruker autoflex III smartbeam MALDI-TOF/TOF (Locality:Germany); Laser system: smartbeam laser with 355nm wavelength. Scan mode: linear; ionmode: positive; acceleration voltage: 20.00kV; ionextraction: 200ns; matrix: DCTB (2-[(2E)-3-(4-tert-butylphenyl)-2-Methylprop-2-enylidene]malononitrile); Ionized reagent : sodium trifluoroacetate.

Size exclusion chromatography (SEC) was conducted on a system composed of a Waters 2414 Refractive Index Detector equipped with a series of connected size exclusion columns (1000 Å and 10000 Å, Phenogel columns, 5 μm, 300 × 7.8 mm Phenomenex Torrance, CA, USA). The system was operated with DMF (containing 0.02 M LiBr) as the eluent at a flow rate of 1 mL/min at 50°C and calibrated with PMMA standards in the molecular weight range from 1860 to 3.3×10<sup>5</sup> Da.

Optical rotation was performed on a Polarimeter 341 plus instrument at 20°C, using sodium lamp as the light source (λ = 589nm, 20W). The specific rotation [α]<sub>D</sub><sup>20</sup> were calculated as follows: [α]<sub>D</sub><sup>20</sup>=(100×a)/(c×d), a, optical rotation; c, concentration in CHCl<sub>3</sub>(1g/100ml); d, optical tube length (dm).

## Synthesis of monomers and polymers

The *rac*-DL were synthesized according to the literature.<sup>[1]</sup>

*rac*-DL: Recrystallized from EA/PE. <sup>1</sup>H NMR (500 MHz, CDCl<sub>3</sub>): δ 5.35 - 5.23 (m, 2H), 2.71 - 2.52 (m, 4H), 1.44 (d, 6H); <sup>13</sup>C NMR (CDCl<sub>3</sub>, 125 MHz): δ 174.05, 74.69, 21.10.

**General procedure for ROP of *rac*-DL monomers.** Under N<sub>2</sub> atmosphere, Catalyst *R*-CPA5 (80 μL, 0.01 M in CHCl<sub>3</sub>) and BnOH (8 μL, 1 M in CHCl<sub>3</sub>) was added to a 5-mL Schlenk flask with *rac*-DL monomer (69 mg, 0.4 mmol) in TOL (400 μL). The solution was rapidly stirred at 60 °C. An aliquot was withdrawn to determine monomer conversion by <sup>1</sup>H NMR spectrum. And the polymer was precipitated into 50 mL CH<sub>3</sub>OH. The product was isolated by centrifugation and dried under vacuum for 24 hours.

Poly(3-hydroxybutyrate) (P3HB): <sup>1</sup>H NMR (500 MHz, CDCl<sub>3</sub>): δ 5.30 - 5.22 (m, 2H), 2.64 - 2.43 (m, 4H), 1.28 - 1.25 (d, 6H); <sup>13</sup>C NMR (CDCl<sub>3</sub>, 125 MHz): δ 169.37, 169.26, 67.92, 40.90, 19.88.

**Table S1.** Controlled ROP of *rac*-DL Mediated by *R*-CPA5<sup>a</sup>

| Entry | $[M]_0/[Cat.]_0$<br>/[BnOH] <sub>0</sub> | Time<br>(h) | Conv. <sup>b</sup><br>(%) | $M_{n, SEC}^c$ (kg/mol) | $\bar{D} (M_w/M_n)^c$ |
|-------|------------------------------------------|-------------|---------------------------|-------------------------|-----------------------|
| 1     | 50/1/1                                   | 24          | 26                        | 2.2                     | 1.07                  |
| 2     | 50/1/1                                   | 36          | 40                        | 2.9                     | 1.06                  |
| 3     | 50/1/1                                   | 42          | 46                        | 3.1                     | 1.06                  |
| 4     | 50/1/1                                   | 48          | 50                        | 3.5                     | 1.06                  |
| 5     | 50/1/1                                   | 60          | 60                        | 4.5                     | 1.05                  |
| 6     | 50/1/1                                   | 66          | 62                        | 4.7                     | 1.06                  |
| 7     | 50/1/1                                   | 72          | 66                        | 4.9                     | 1.06                  |
| 8     | 50/1/1                                   | 84          | 72                        | 5.4                     | 1.05                  |
| 9     | 50/1/1                                   | 90          | 74                        | 5.7                     | 1.05                  |
| 10    | 50/1/1                                   | 96          | 79                        | 6.1                     | 1.06                  |
| 11    | 50/1/1                                   | 108         | 84                        | 6.6                     | 1.05                  |
| 12    | 50/1/1                                   | 120         | 87                        | 6.9                     | 1.05                  |

[a] All ROPs were initiated using benzyl alcohol in dry toluene at 60 °C. [b] Monomer conversion measured by <sup>1</sup>H NMR. [c] Determined by SEC in DMF (0.02M LiBr) relative to PMMA standards.

**Table S2.** Controlled ROP of *rac*-DL Mediated by *S*-CPA5<sup>a</sup>

| Entry | $[M]_0/[Cat.]_0$<br>/[BnOH] <sub>0</sub> | Time<br>(h) | Conv. <sup>b</sup><br>(%) | $M_{n, SEC}^c$ (kg/mol) | $\bar{D} (M_w/M_n)^c$ |
|-------|------------------------------------------|-------------|---------------------------|-------------------------|-----------------------|
| 1     | 50/1/1                                   | 24          | 26                        | 2.2                     | 1.08                  |
| 2     | 50/1/1                                   | 36          | 43                        | 3.1                     | 1.06                  |
| 3     | 50/1/1                                   | 42          | 46                        | 3.4                     | 1.06                  |
| 4     | 50/1/1                                   | 48          | 50                        | 3.7                     | 1.06                  |
| 5     | 50/1/1                                   | 60          | 64                        | 4.3                     | 1.05                  |
| 6     | 50/1/1                                   | 66          | 66                        | 4.5                     | 1.06                  |
| 7     | 50/1/1                                   | 72          | 72                        | 4.9                     | 1.05                  |
| 8     | 50/1/1                                   | 84          | 77                        | 5.1                     | 1.06                  |
| 9     | 50/1/1                                   | 90          | 78                        | 5.3                     | 1.06                  |
| 10    | 50/1/1                                   | 96          | 82                        | 5.7                     | 1.05                  |
| 11    | 50/1/1                                   | 108         | 86                        | 6.1                     | 1.05                  |
| 12    | 50/1/1                                   | 120         | 89                        | 6.7                     | 1.05                  |

[a] All ROPs were initiated using benzyl alcohol in dry toluene at 60 °C. [b] Monomer conversion measured by <sup>1</sup>H NMR. [c] Determined by SEC in DMF (0.02M LiBr) relative to PMMA standards.

**Table S3.** Controlled ROP of *rac*-DL Mediated by *rac*-CPA5<sup>a</sup>

| Entry | [M] <sub>0</sub> /[Cat.] <sub>0</sub><br>/[BnOH] <sub>0</sub> | Time<br>(h) | Conv. <sup>b</sup><br>(%) | <i>M</i> <sub>n, SEC</sub> <sup>c</sup> (kg/mol) | <i>D</i> ( <i>M</i> <sub>w</sub> / <i>M</i> <sub>n</sub> ) <sup>c</sup> |
|-------|---------------------------------------------------------------|-------------|---------------------------|--------------------------------------------------|-------------------------------------------------------------------------|
| 1     | 50/1/1                                                        | 24          | 32                        | 2.8                                              | 1.07                                                                    |
| 2     | 50/1/1                                                        | 36          | 49                        | 3.6                                              | 1.06                                                                    |
| 3     | 50/1/1                                                        | 42          | 52                        | 4.0                                              | 1.06                                                                    |
| 4     | 50/1/1                                                        | 48          | 59                        | 4.5                                              | 1.05                                                                    |
| 5     | 50/1/1                                                        | 60          | 67                        | 4.9                                              | 1.04                                                                    |
| 6     | 50/1/1                                                        | 66          | 70                        | 5.2                                              | 1.06                                                                    |
| 7     | 50/1/1                                                        | 72          | 77                        | 5.7                                              | 1.05                                                                    |
| 8     | 50/1/1                                                        | 84          | 81                        | 6.2                                              | 1.04                                                                    |
| 9     | 50/1/1                                                        | 90          | 85                        | 6.4                                              | 1.04                                                                    |
| 10    | 50/1/1                                                        | 96          | 87                        | 6.6                                              | 1.05                                                                    |
| 11    | 50/1/1                                                        | 108         | 90                        | 7.0                                              | 1.05                                                                    |
| 12    | 50/1/1                                                        | 120         | 91                        | 7.1                                              | 1.05                                                                    |

[a] All ROPs were initiated using benzyl alcohol in dry toluene at 60 °C. [b] Monomer conversion measured by <sup>1</sup>H NMR. [c] Determined by SEC in DMF (0.02M LiBr) relative to PMMA standards.

## Statistical analyses for polymer samples

**Table S4.** Triads probabilities of ESC and CEC mechanisms based on non-Bernoullian and Bernoullian statistics [2].

| triads | Probability of ESC (non-Bernoullian) | Probability of CEC (Bernoullian) |
|--------|--------------------------------------|----------------------------------|
| mm     | $P_m^2 + (1 - P_m)^2$                | $P_m$                            |
| mr     | $P_m(1 - P_m)$                       | $(1 - P_m)/2$                    |
| rm     | $P_m(1 - P_m)$                       | $(1 - P_m)/2$                    |

**Table S5.** Analysis of microstructures of **P3HB**<sup>a</sup>.

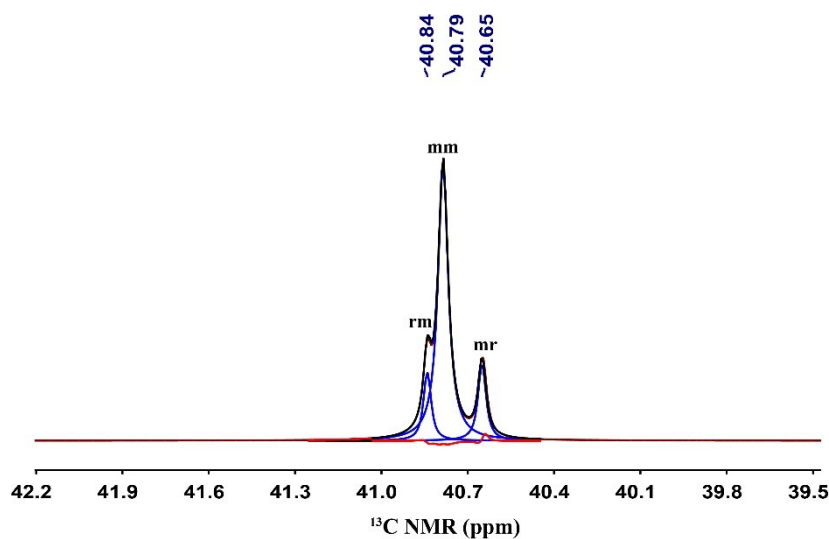

| ppm   | integration | Triads | $P_{m,ESC}$ | $P_{m,CEC}$ |
|-------|-------------|--------|-------------|-------------|
| 40.84 | 0.143       | rm     | 0.83        | 0.71        |
| 40.79 | 0.709       | mm     | 0.82        | 0.71        |
| 40.65 | 0.148       | mr     | 0.82        | 0.71        |

<sup>a</sup> $M_n = 3.7$  kg/mol,  $D = 1.05$ . <sup>b</sup>The tetrads in <sup>13</sup>C NMR are assigned through comparing the observed integration value.

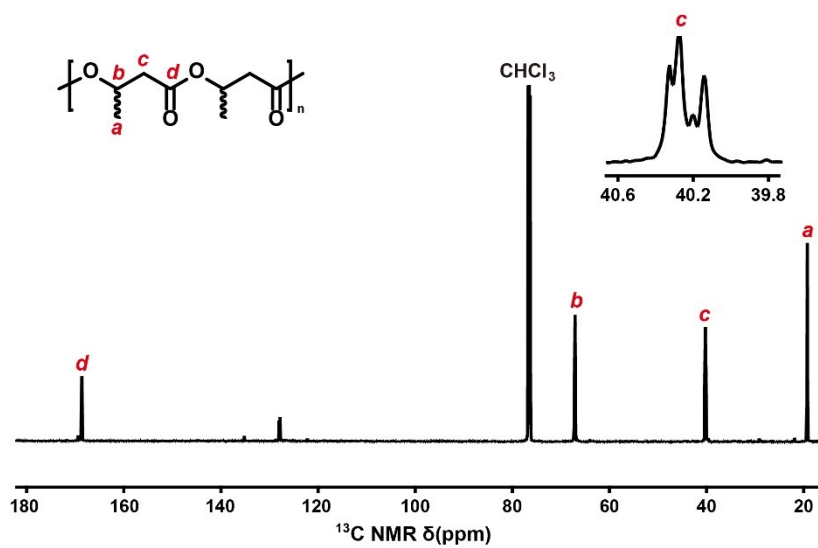

**Figure S1.**  $^{13}\text{C}$  NMR spectrum ( $\text{CDCl}_3$ ) of P3HB produced by *R*-CPA1 (entry 1).

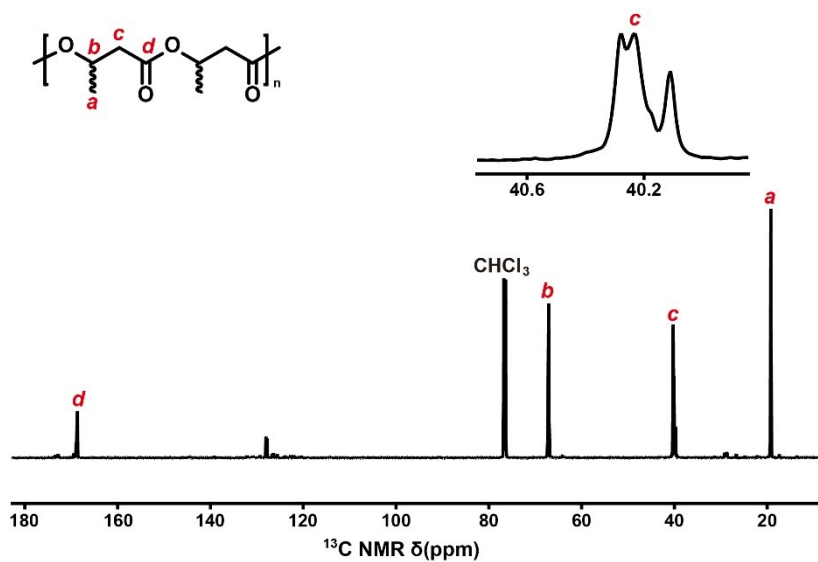

**Figure S2.**  $^{13}\text{C}$  NMR spectrum ( $\text{CDCl}_3$ ) of P3HB produced by *R*-CPA2 (entry 2).



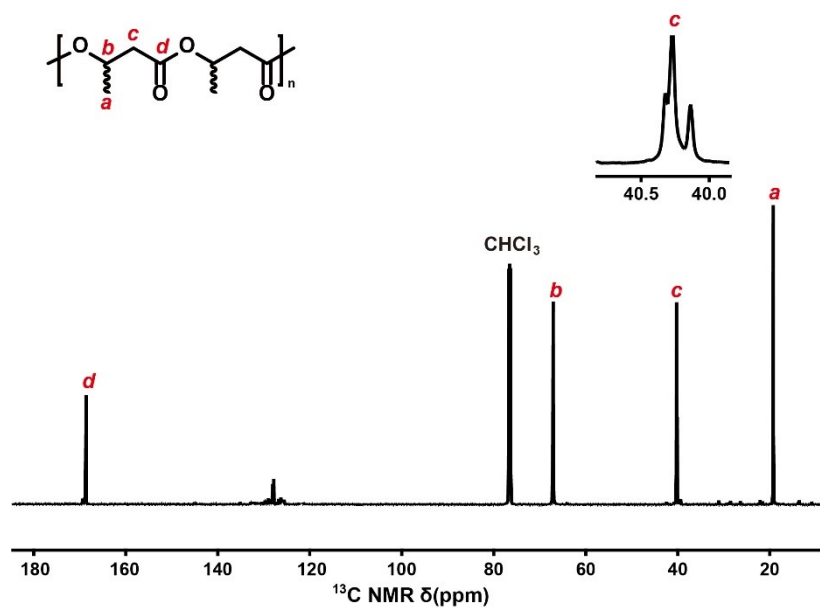

**Figure S3.**  $^{13}\text{C}$  NMR spectrum ( $\text{CDCl}_3$ ) of P3HB produced by R-CPA3 (entry 3).

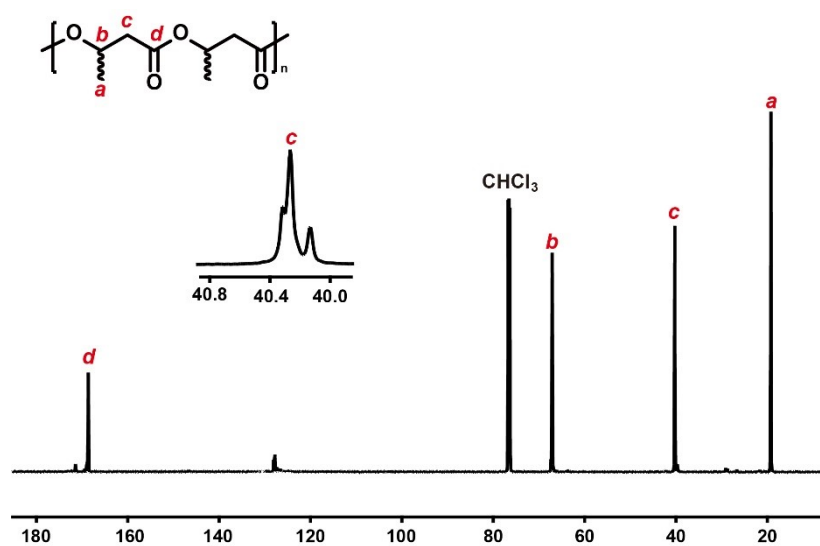

**Figure S4.**  $^{13}\text{C}$  NMR spectrum ( $\text{CDCl}_3$ ) of P3HB produced by R-CPA4 (entry 4).

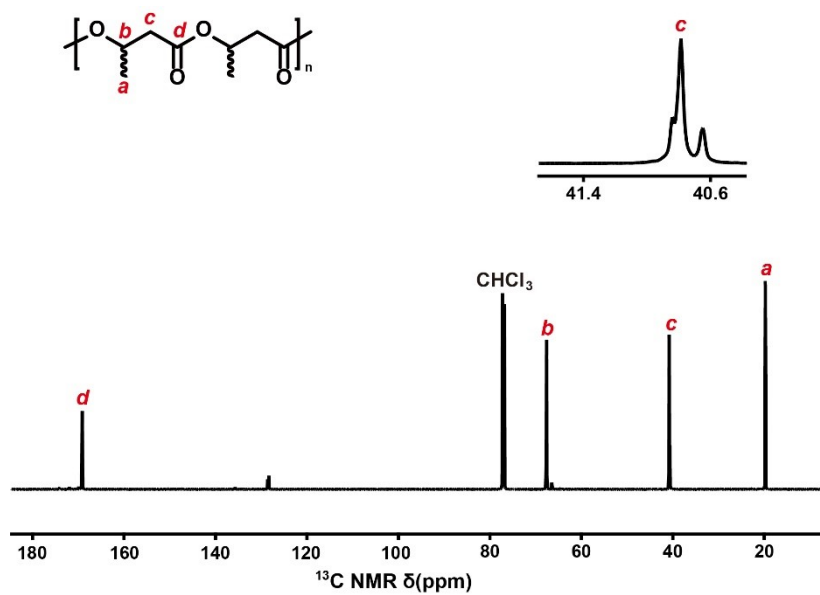

**Figure S5.**  $^{13}\text{C}$  NMR spectrum (CDCl<sub>3</sub>) of P3HB produced by *R*-CPA5 (entry 5).

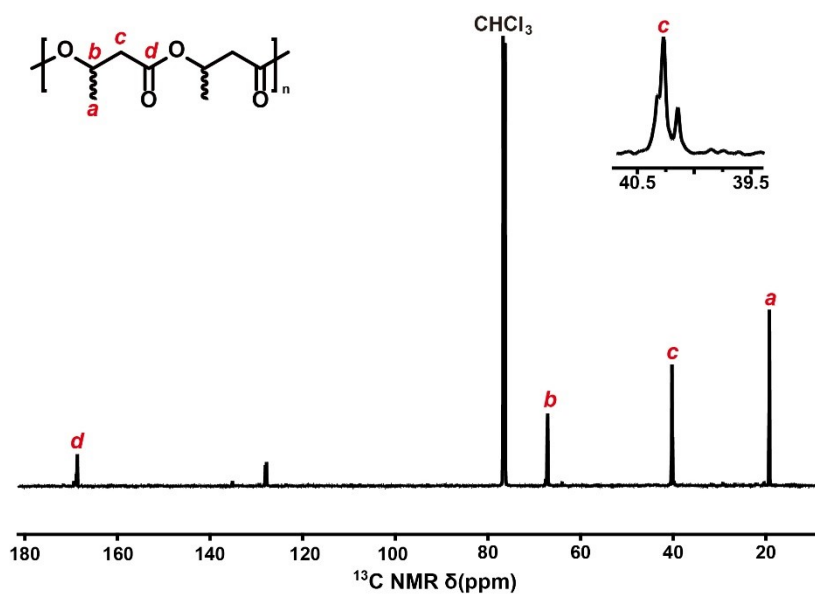

**Figure S6.**  $^{13}\text{C}$  NMR spectrum (CDCl<sub>3</sub>) of P3HB produced by *R*-CPA6 (entry 6).

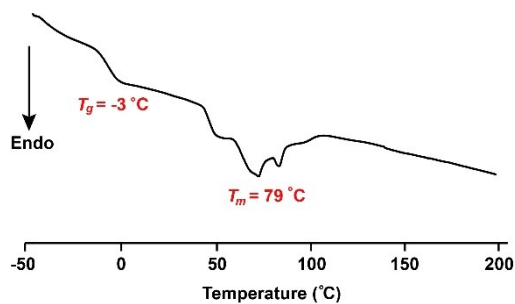

**Figure S7.** DSC thermograms (first heating scan) of P3HB using *R*-CPA5 as catalyst (Table 1, entry 10).

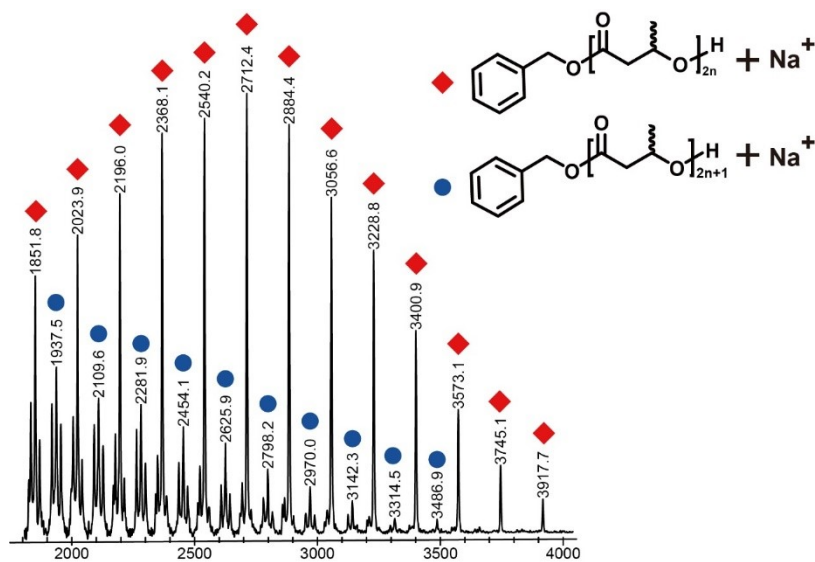

**Figure S8.** MALDI-TOF-MS of P3HB prepared by *R*-CPA1.

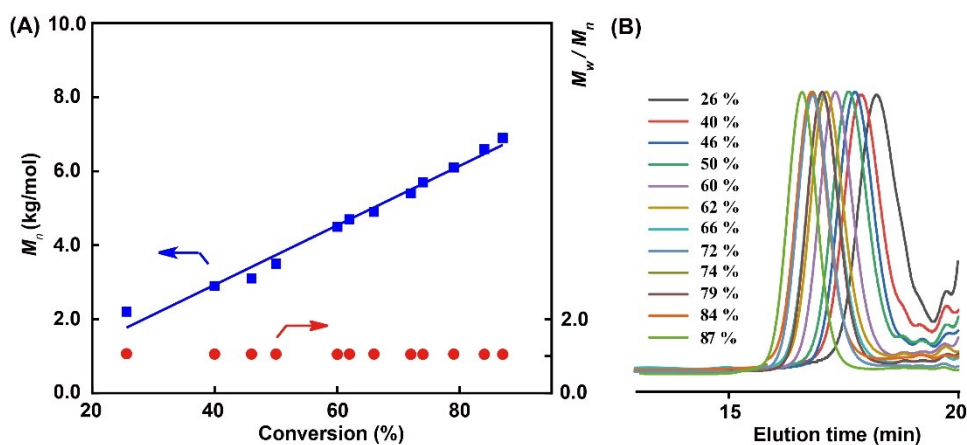

**Figure S9.** (A) Profiles of  $M_n$  and  $\bar{D}$  as a function of *rac*-DL conversions at the  $[M]_0/[BnOH]_0/[R-CPA5]_0$  ratio of 50/1/1. (B) Overlay of SEC profiles at different *rac*-DL conversions.

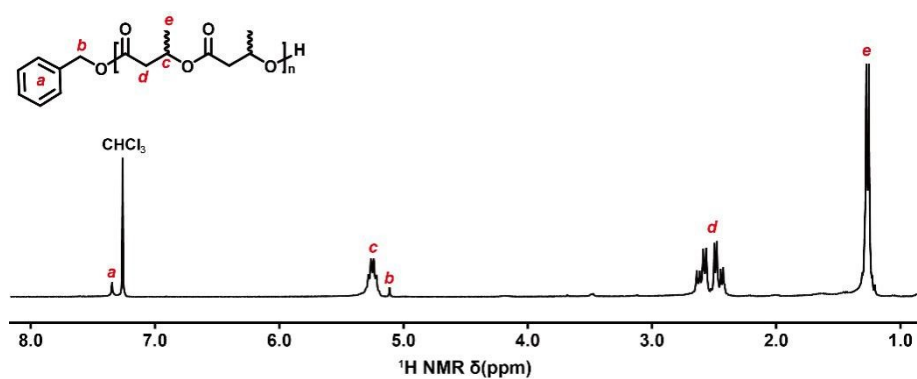

**Figure S10.**  $^1\text{H}$  NMR spectrum of P3HB from *R*-CPA5/BnOH mediated ROP of *rac*-DL in  $\text{CDCl}_3$ . The conversion of *rac*-DL was determined to be 50% and the polymerization condition is *rac*-DL/*R*-CPA5/BnOH = 50/1/1, 60 °C, and 48 h.

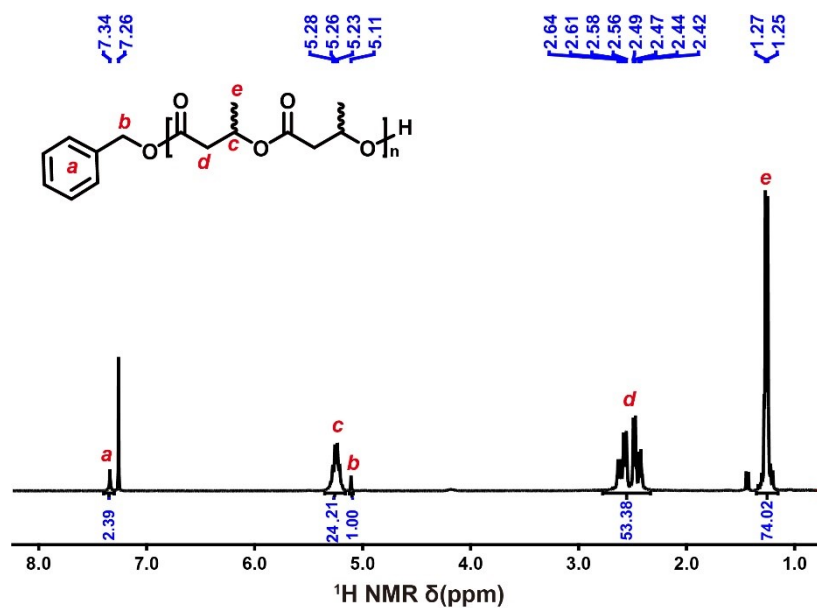

**Figure S11.**  $^1\text{H}$  NMR spectrum of P3HB from *R*-CPA5/BnOH mediated ROP of *rac*-DL in  $\text{CDCl}_3$ . The conversion of *rac*-DL was determined to be 90% and the polymerization condition is *rac*-DL/*R*-CPA5/BnOH = 50/1/1, 60 °C, and 132 h.

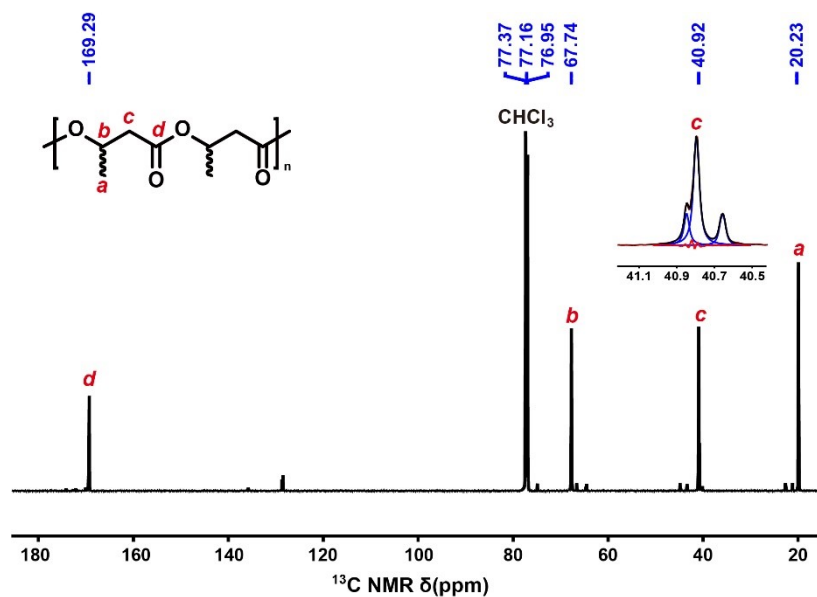

**Figure S12.**  $^{13}\text{C}$  NMR spectrum of P3HB from *R*-CPA5/BnOH mediated ROP of *rac*-DL in  $\text{CDCl}_3$ . The conversion of *rac*-DL was determined to be 90% and the polymerization condition is *rac*-DL/*R*-CPA5/BnOH = 50/1/1, 60 °C, and 132 h.

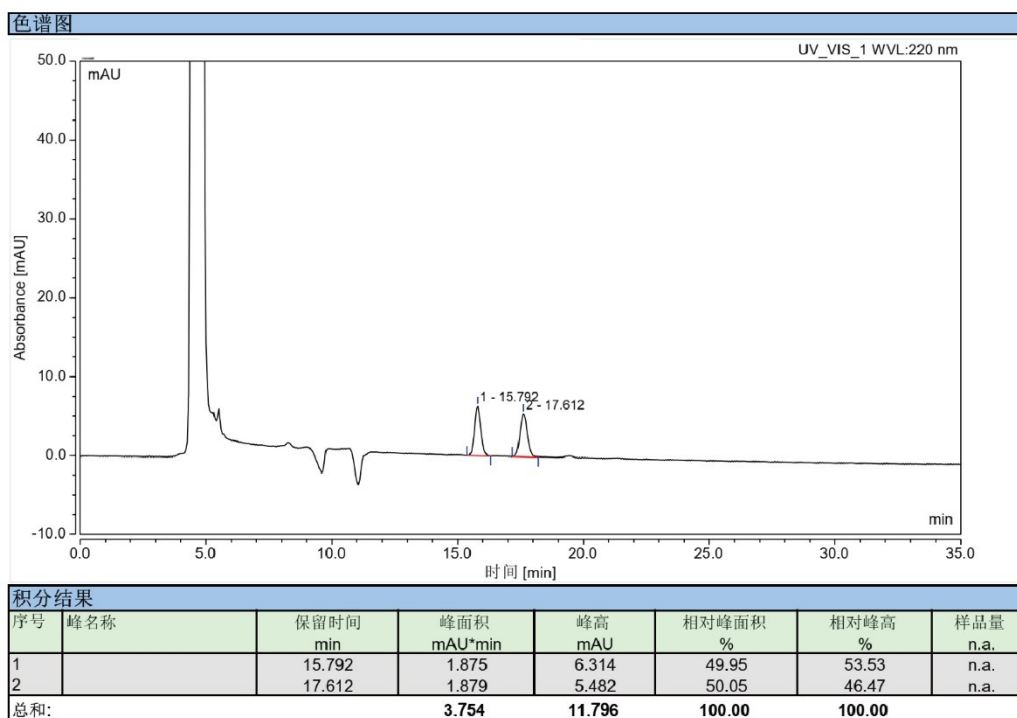

**Figure S13.** HPLC chromatogram of *rac*-DL separated by chiral column into enantiomers in 1:1 ratio.

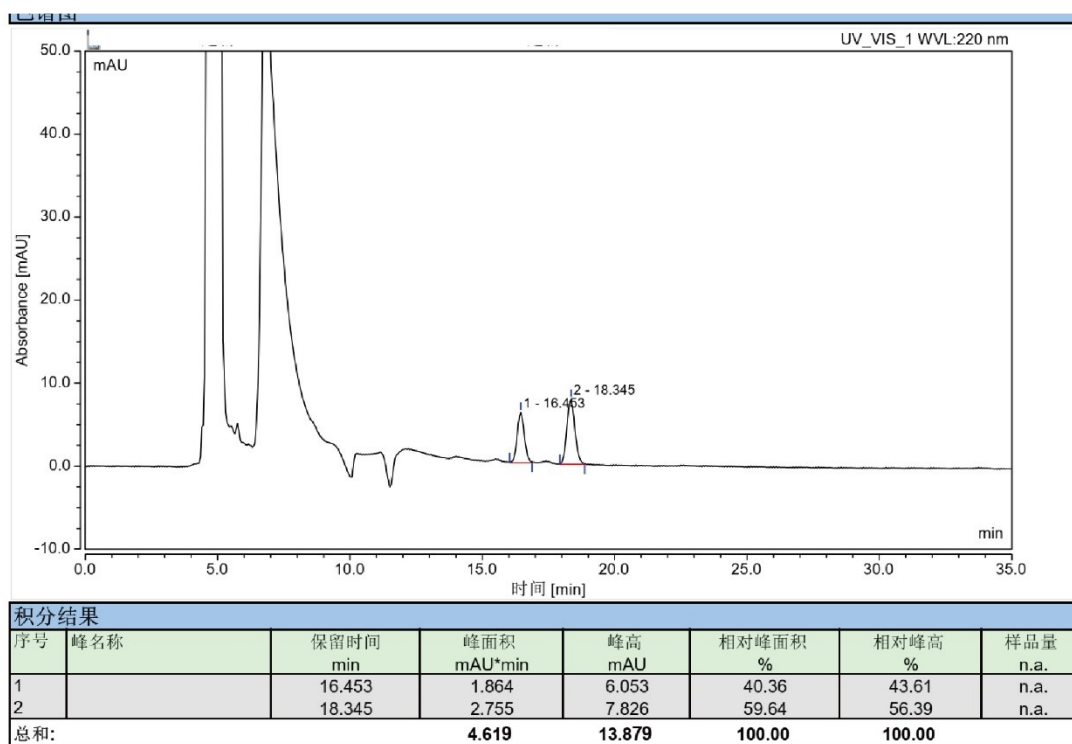

**Figure S14.** HPLC chromatogram of the unreacted monomer from the polymerization of *rac*-DL by *R*-CPA5 (Table 1, Entry 5). The stereoselectivity factor ( $s$ ) was calculated from:  $s = \ln[(1 - \text{conv.})(1 - ee)] / \ln[(1 - \text{conv.})(1 + ee)]$ .

## NMR spectra of synthesized compounds and polymers

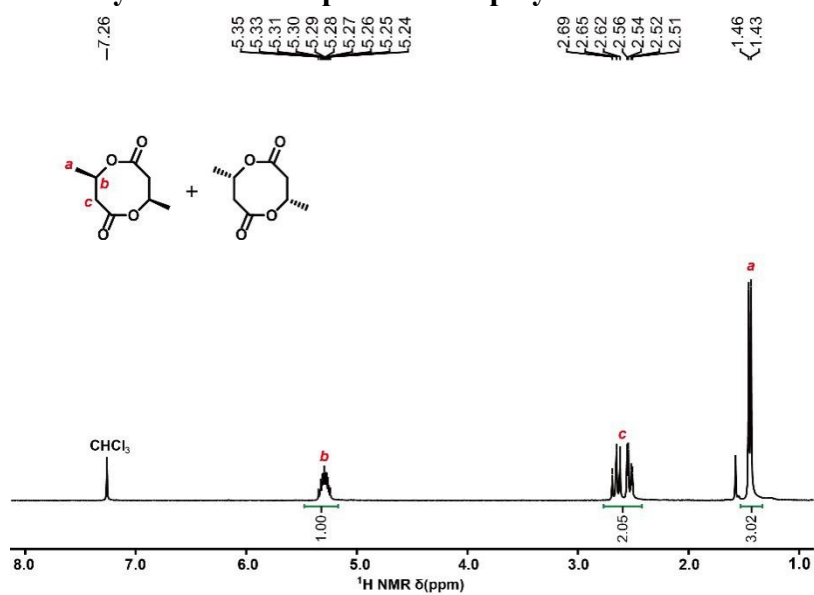

**Figure S15:**  $^1\text{H}$  NMR spectrum of *rac*-DL in  $\text{CDCl}_3$ .

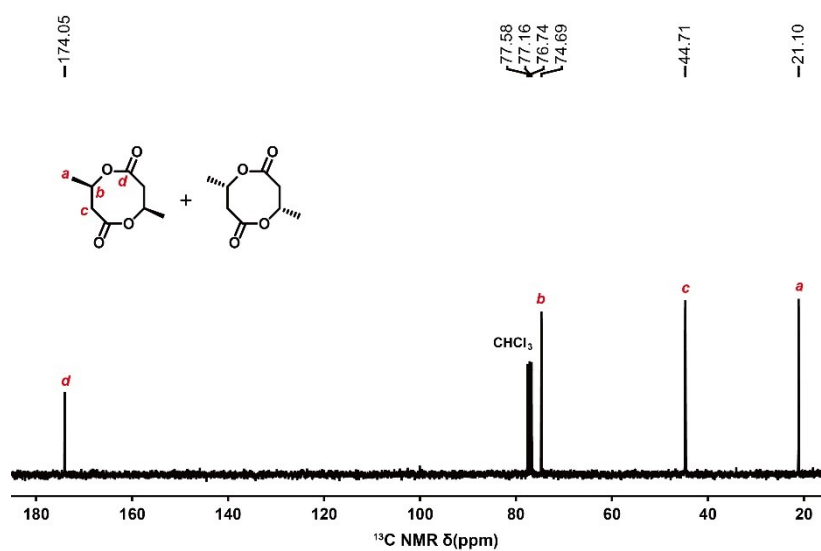

**Figure S16:**  $^{13}\text{C}$  NMR spectrum of *rac*-DL in  $\text{CDCl}_3$ .





## Computational Methodology

All the density functional theory (DFT) calculations were performed by Gaussian 09 program packages<sup>[3]</sup> with empirical dispersion (D3)<sup>[4-7]</sup> corrected B3LYP functional.<sup>[8-9]</sup> Geometry optimizations were carried out in the gas phase with the 6-31G (d,p) basis set,<sup>[10]</sup> and vibration analysis were conducted at 333.15 K. Normal modes of all the intermediates (INT) were verified by calculations of the vibrational frequencies and exhibited no imaginary frequencies. Only one imaginary frequency connecting to bond formation or bond breaking was attained for the transition states (TS), and intrinsic reaction coordinate (IRC)<sup>[11-12]</sup> calculations were also conducted to ascertain the connectivity between the transition states and intermediates. The energy of each species was refined by a single-point calculation at the B3LYP /6-311+g(2d,p) level coupled with SMD model<sup>[13]</sup> and solvation corrections in implicit toluene solvent, and a temperature  $T = 333.15$  K was used. The energies reported in this method were the sum of electronic and thermal free energies in the unit of kcal/mol, and bond lengths were displayed in Å. All structures were visualized with CYLview.<sup>[8]</sup>

**Optimized structures**

**(A) *R*-Chain + (*R*, *R*)-DL**

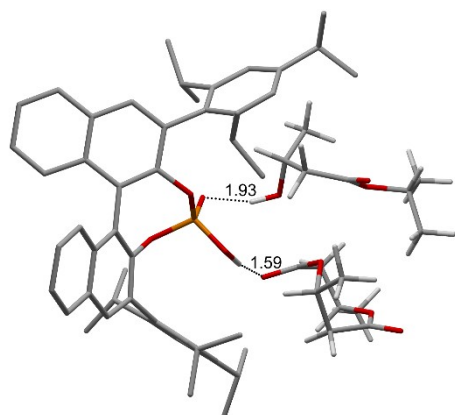

**<sup>1</sup>INT1 (-9.2)**

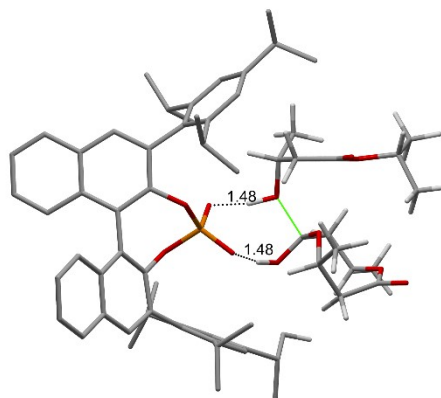

**<sup>1</sup>TS1 (6.5)**

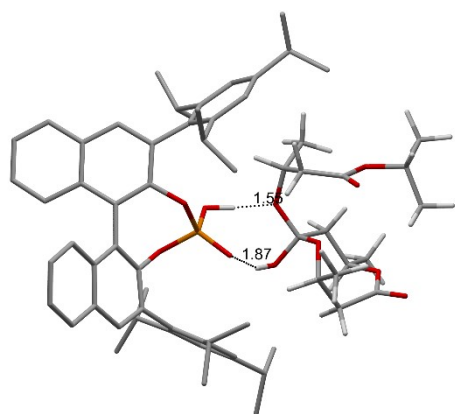

**<sup>1</sup>INT2 (2.3)**

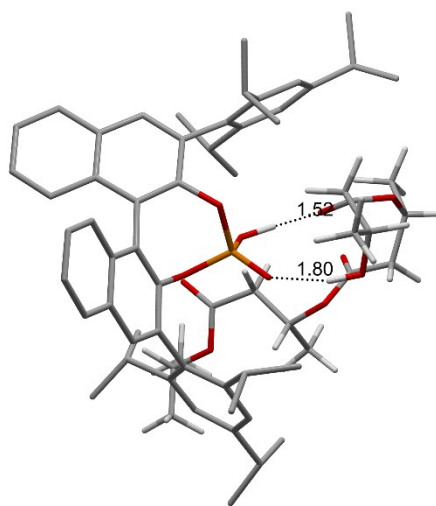

**<sup>1</sup>INT3 (-23.8)**

**(B) R-Chain + (S, S)-DL**

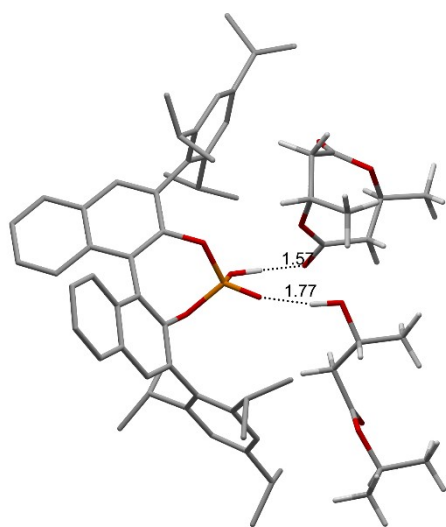

**<sup>2</sup>INT1 (-11.1)**

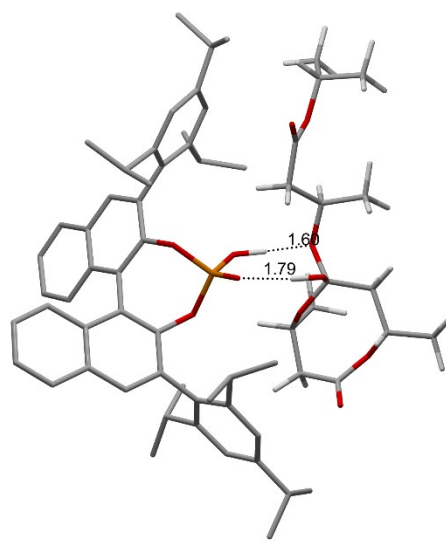

**<sup>2</sup>TS1 (11.9)**

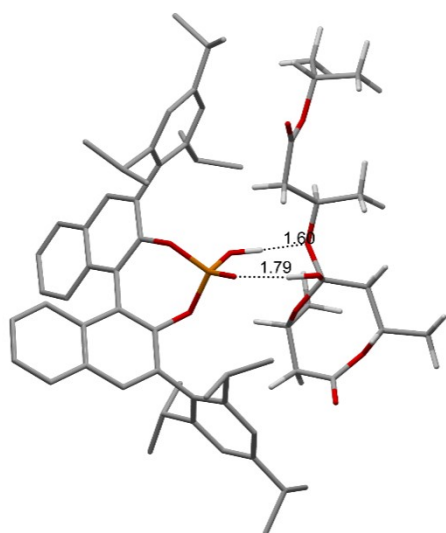

**<sup>2</sup>INT2 (7.8)**

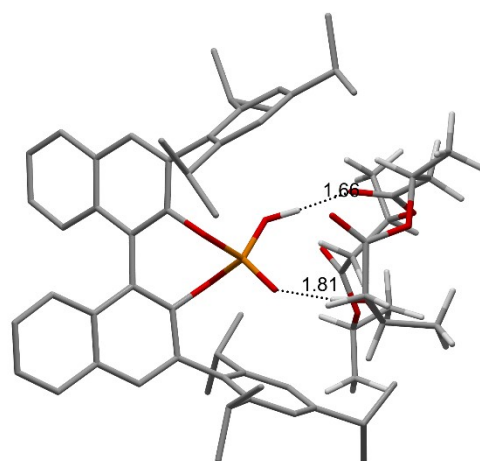

**<sup>2</sup>INT3 (-24.3)**

**(C) S-Chain + (R, R)-DL**

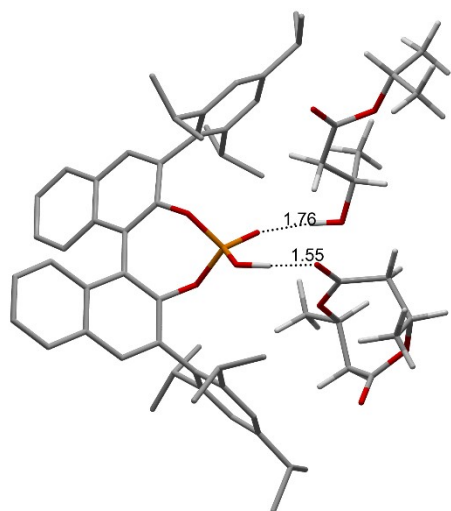

**<sup>3</sup>INT1 (-10.0)**

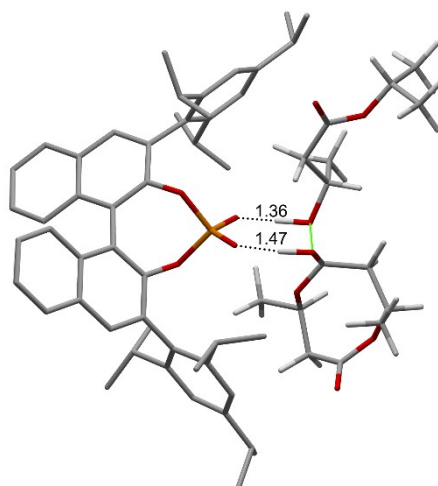

**<sup>3</sup>TS1 (7.4)**

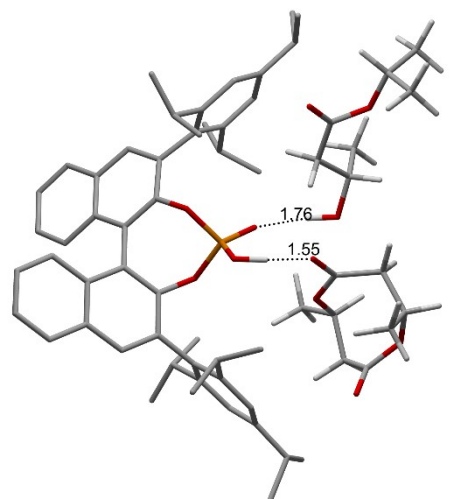

**<sup>3</sup>INT2 (3.6)**

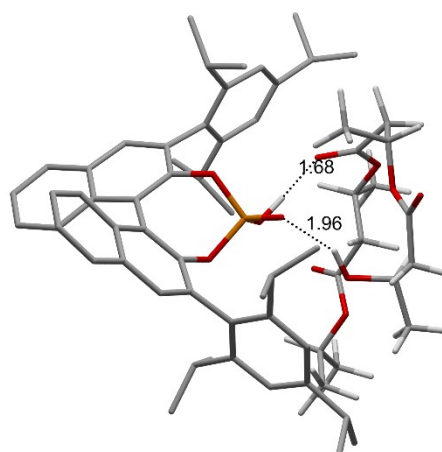

**<sup>3</sup>INT3 (-19.2)**

**(D) S-Chain + (S, S)-DL**

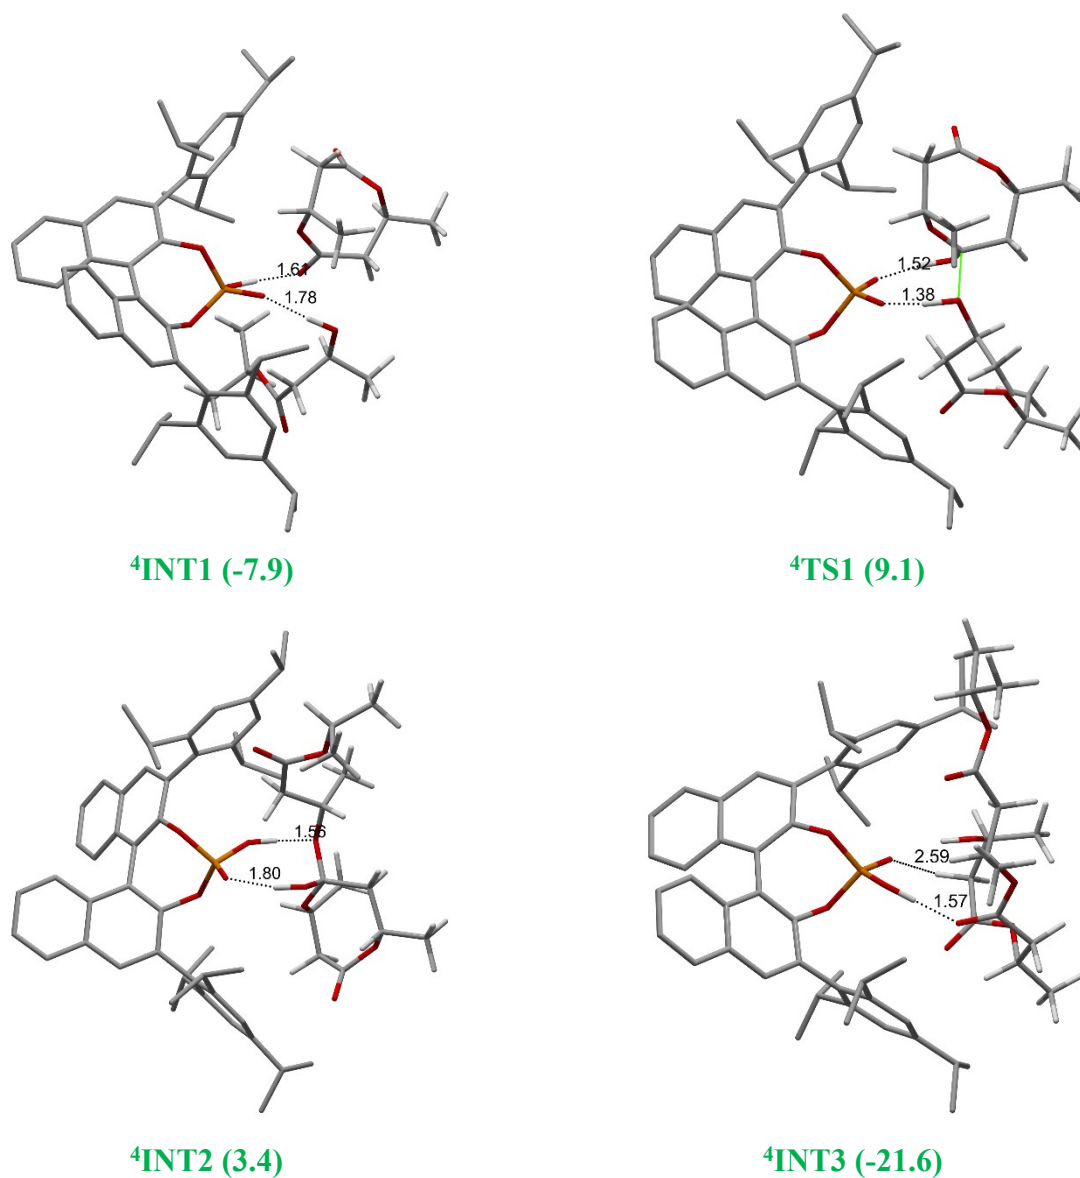

**Figure S19.** Optimized structures for all the transition states and intermediates. Select bond lengths are listed in Å. All energies are relative to the separated reactants in the unit of kcal/mol. In all cases, the following color-coding scheme applies: H = white, C = grey, O = red, P = brown. H-bonding interactions are indicated with black dotted lines. Breaking and forming bonds are indicated with green lines. (A) *R*-Chain + (*R, R*)-DL; (B) *R*-Chain + (*S, S*)-DL; (C) *S*-Chain + (*R, R*)-DL; (D) *S*-Chain + (*S, S*)-DL.

**Coordinates**  
***R*-CPA5**

|   |             |             |             |
|---|-------------|-------------|-------------|
| C | 2.48943800  | 5.25026700  | -2.57244900 |
| C | 3.24490100  | 4.17659500  | -2.16297200 |
| C | 2.65854800  | 3.10448500  | -1.43769600 |
| C | 0.51070300  | 4.27529000  | -1.56349900 |
| C | 1.10577600  | 5.28959300  | -2.27955500 |
| H | 4.47807200  | 1.94077800  | -1.31298800 |
| H | 2.94714500  | 6.06012800  | -3.13239400 |
| H | 4.30357100  | 4.12202300  | -2.40180400 |
| C | 3.42080000  | 1.96746900  | -1.06849200 |
| H | -0.55142800 | 4.31506800  | -1.35445500 |
| H | 0.50561800  | 6.12470800  | -2.62815700 |
| C | 1.47560000  | 0.96972100  | -0.10455800 |
| C | 2.85064900  | 0.87868700  | -0.44490600 |
| C | -0.71384100 | 2.13041300  | 0.15944000  |
| C | -1.20746700 | 3.19788200  | 0.98794500  |
| C | -1.57200000 | 1.08109700  | -0.11547300 |
| C | -0.38149700 | 4.24857900  | 1.47280300  |
| C | -2.58863400 | 3.19193800  | 1.37367600  |
| C | -2.91791000 | 1.00601300  | 0.33532800  |
| C | -0.90207200 | 5.26138300  | 2.24710200  |
| H | 0.67402000  | 4.24512600  | 1.23115700  |
| C | -3.09706300 | 4.26194400  | 2.15829400  |
| C | -3.41340300 | 2.09214200  | 1.02225400  |
| C | -2.27615800 | 5.28060400  | 2.58229100  |
| H | -0.24918500 | 6.05017100  | 2.60847500  |
| H | -4.14857500 | 4.24908400  | 2.43242000  |
| H | -4.44738700 | 2.08725200  | 1.35182000  |
| H | -2.67473000 | 6.08951000  | 3.18698800  |
| O | -1.12194600 | 0.02851100  | -0.91363600 |
| O | 0.92194800  | -0.12876500 | 0.56587700  |
| P | -0.10247700 | -1.06350400 | -0.27352500 |
| C | -3.68767000 | -0.26056100 | 0.12995400  |
| C | -4.06994700 | -0.66239800 | -1.17052000 |
| C | -4.59018800 | -2.33158200 | 1.00933600  |
| C | -4.97068200 | -2.74906600 | -0.26726600 |
| H | -4.80128500 | -2.98247100 | 1.85277900  |
| C | 3.63646300  | -0.35365000 | -0.12840500 |
| C | 4.00412800  | -0.62779600 | 1.20769400  |
| C | 4.01005500  | -1.23504200 | -1.16605100 |
| C | 4.76328300  | -1.76830200 | 1.47657000  |
| C | 4.78147400  | -2.35731200 | -0.84259700 |
| C | 5.16847200  | -2.64394200 | 0.46582800  |
| H | 5.04667600  | -1.97847100 | 2.50409900  |
| H | 5.08199800  | -3.03644700 | -1.63544500 |
| C | -5.64354200 | -4.09588000 | -0.48176000 |
| C | -4.77663300 | -5.02223500 | -1.35408800 |
| C | -7.05437500 | -3.93669300 | -1.07641900 |
| H | -5.74957900 | -4.56909800 | 0.50332700  |
| H | -3.78243500 | -5.16029500 | -0.91817000 |
| H | -5.24566600 | -6.00637800 | -1.45885800 |
| H | -4.64447200 | -4.60600200 | -2.35851900 |
| H | -7.67975600 | -3.29778000 | -0.44539300 |
| H | -7.01324400 | -3.48440300 | -2.07317100 |
| H | -7.54496100 | -4.91106400 | -1.17331800 |
| C | -3.83885500 | 0.21932500  | -2.39366200 |
| C | -5.18044200 | 0.74195500  | -2.94170400 |
| C | -3.03047700 | -0.50158300 | -3.48693800 |
| H | -3.25852700 | 1.09162900  | -2.08189100 |
| H | -5.73279900 | 1.29404300  | -2.17449400 |
| H | -5.01331200 | 1.41103500  | -3.79262300 |
| H | -5.81617300 | -0.08230000 | -3.28311600 |
| H | -2.07975000 | -0.86849300 | -3.09394600 |
| H | -3.58374200 | -1.35126200 | -3.90156800 |

|   |             |             |             |
|---|-------------|-------------|-------------|
| H | -2.81873400 | 0.18561000  | -4.31304200 |
| C | 3.61411100  | -0.99729600 | -2.62148700 |
| C | 3.03765900  | -2.25501800 | -3.29492000 |
| C | 4.80701200  | -0.44728900 | -3.42650700 |
| H | 2.82333700  | -0.24165100 | -2.63552400 |
| H | 2.19797900  | -2.64823500 | -2.72016300 |
| H | 2.68102000  | -2.00470200 | -4.30019300 |
| H | 3.79325900  | -3.04048200 | -3.40596600 |
| H | 5.18801100  | 0.48564000  | -2.99987000 |
| H | 5.63190100  | -1.16867800 | -3.43513800 |
| H | 4.51701000  | -0.25301300 | -4.46502500 |
| C | 3.60878400  | 0.28459500  | 2.36534100  |
| C | 4.84743900  | 0.87975500  | 3.05957300  |
| C | 2.69784100  | -0.44343400 | 3.37064000  |
| H | 3.03784300  | 1.12556100  | 1.96158700  |
| H | 5.47481800  | 1.42390700  | 2.34633500  |
| H | 4.54792600  | 1.57382900  | 3.85261200  |
| H | 5.46366700  | 0.09813100  | 3.51660200  |
| H | 1.80557500  | -0.83145300 | 2.87347100  |
| H | 3.21970400  | -1.28283200 | 3.84304900  |
| H | 2.38095000  | 0.24116600  | 4.16541900  |
| C | 5.99569500  | -3.88031200 | 0.78342500  |
| C | 5.22205200  | -4.85746700 | 1.68711100  |
| C | 7.35429500  | -3.51072100 | 1.40545000  |
| H | 6.19420000  | -4.39353700 | -0.16674700 |
| H | 4.26806000  | -5.14154000 | 1.23287100  |
| H | 5.80523600  | -5.76779000 | 1.86494100  |
| H | 5.00552700  | -4.40386500 | 2.66050400  |
| H | 7.91688700  | -2.83658900 | 0.75220400  |
| H | 7.22186700  | -3.00721000 | 2.36930600  |
| H | 7.95950200  | -4.40740900 | 1.57850100  |
| C | 0.68840600  | 2.08704200  | -0.34414400 |
| C | 1.26714600  | 3.16371100  | -1.10055300 |
| C | -3.95614200 | -1.10256300 | 1.24049600  |
| C | -3.62372500 | -0.70251100 | 2.67945900  |
| C | -2.98689600 | -1.82943600 | 3.51266600  |
| C | -4.89282600 | -0.18183400 | 3.38383800  |
| H | -2.89872700 | 0.11447200  | 2.64549700  |
| H | -2.07212300 | -2.20724600 | 3.05116300  |
| H | -2.72369100 | -1.44681600 | 4.50415200  |
| H | -3.67241900 | -2.66965900 | 3.66392500  |
| H | -5.34853300 | 0.64815000  | 2.83667400  |
| H | -5.64280100 | -0.97696300 | 3.46042100  |
| H | -4.65935900 | 0.16362700  | 4.39664700  |
| O | 0.42647400  | -1.96133900 | -1.31208400 |
| O | -0.86530800 | -1.71740900 | 0.97745900  |
| H | -1.74311900 | -2.05789100 | 0.73310700  |
| C | -4.70896300 | -1.89306100 | -1.33925400 |
| H | -5.00296700 | -2.19504600 | -2.33994600 |

**R-Chain**

|   |             |             |            |
|---|-------------|-------------|------------|
| C | -0.23659200 | 2.49021000  | 4.02843300 |
| C | -0.13963000 | 1.00779100  | 3.79272700 |
| O | 0.07951900  | 0.30981400  | 4.90984200 |
| C | 0.27442200  | -1.15107400 | 4.82799000 |
| O | -0.22152900 | 0.47747500  | 2.67181000 |
| H | -0.14560800 | 2.70123500  | 5.11184600 |
| H | -1.23546500 | 2.83455600  | 3.67875800 |
| H | -0.24378800 | -1.49908500 | 3.91088600 |
| C | -0.37641600 | -1.73119800 | 6.07847800 |
| H | -1.45304500 | -1.47136800 | 6.12911600 |
| H | -0.28709200 | -2.83638900 | 6.06967800 |
| H | 0.11654700  | -1.35099100 | 6.99720300 |

|   |            |             |            |
|---|------------|-------------|------------|
| C | 1.76894400 | -1.43198300 | 4.71943800 |
| H | 2.18911400 | -0.97385900 | 3.80307600 |
| H | 2.31258700 | -1.04083600 | 5.60455900 |
| H | 1.94326300 | -2.52446300 | 4.65058900 |
| O | 0.70874357 | 2.96941712  | 1.79647414 |
| H | 1.22774652 | 3.59502050  | 1.28573316 |
| C | 2.21775355 | 2.79490366  | 3.70542048 |
| H | 2.16998160 | 2.64758509  | 4.76415325 |
| H | 2.48344920 | 1.87446558  | 3.22887084 |
| H | 2.95434212 | 3.53803267  | 3.48159789 |
| C | 0.84396900 | 3.26212500  | 3.18964900 |
| H | 0.73422307 | 4.32614391  | 3.21647403 |

**S-Chain**

|   |             |             |             |
|---|-------------|-------------|-------------|
| C | -1.96732400 | -0.51849500 | -0.05762200 |
| C | -1.39696500 | 0.75309800  | -0.68982800 |
| C | 0.04806400  | 0.99706900  | -0.29929600 |
| O | 0.80174600  | -0.10027900 | -0.54081700 |
| C | 2.19491100  | -0.05218600 | -0.11734500 |
| C | -3.43547100 | -0.73157100 | -0.42380200 |
| O | 0.47988200  | 2.03453000  | 0.15292900  |
| H | -1.36955900 | -1.37146700 | -0.41137800 |
| H | -3.82421400 | -1.63762300 | 0.05480100  |
| H | -3.56377300 | -0.84430600 | -1.50554800 |
| H | -4.03659200 | 0.11742200  | -0.08388500 |
| H | -1.45749100 | 0.67217100  | -1.78120400 |
| H | -1.97282700 | 1.62489000  | -0.37087700 |
| H | 2.57735800  | 0.94782100  | -0.34510300 |
| C | 2.91435000  | -1.10609400 | -0.94426900 |
| H | 2.80877000  | -0.89962800 | -2.01287900 |
| H | 3.97977700  | -1.11672500 | -0.69510300 |
| H | 2.50219100  | -2.09981100 | -0.74175900 |
| C | 2.26425400  | -0.30090100 | 1.38502400  |
| H | 1.71383200  | 0.47439100  | 1.92145600  |
| H | 1.82797900  | -1.27542500 | 1.62646400  |
| H | 3.30522100  | -0.29021500 | 1.72353100  |
| O | -1.80299600 | -0.35458600 | 1.35331900  |
| H | -2.05065700 | -1.18433900 | 1.78087000  |

**(R, R)-DL**

|   |             |             |             |
|---|-------------|-------------|-------------|
| O | -0.87648500 | 2.51847100  | -0.15953600 |
| C | -0.33602500 | 1.51085800  | 0.23066100  |
| C | 1.79310300  | 0.17209000  | 0.19584400  |
| H | 1.63846500  | -0.06107500 | 1.25631800  |
| C | -1.81149300 | -0.52337800 | 0.22806700  |
| H | -2.13947700 | -1.36394200 | 0.84678300  |
| C | 0.21353600  | -1.68100600 | -0.17895400 |
| O | 0.09290200  | -2.50266400 | 0.70016900  |
| C | -2.96446200 | 0.05592200  | -0.56932700 |
| C | 3.21178800  | 0.68670000  | -0.01015900 |
| H | -3.37663500 | -0.70790900 | -1.23342800 |
| H | -3.75250000 | 0.39276400  | 0.11038700  |
| H | -2.63506800 | 0.91031500  | -1.16447200 |
| H | 3.94067700  | -0.06526900 | 0.30510400  |
| H | 3.37802400  | 0.92101800  | -1.06536600 |
| H | 3.36715900  | 1.59737900  | 0.57306800  |
| C | 1.52343200  | -1.10381300 | -0.64745800 |
| H | 2.32471600  | -1.82392300 | -0.46947400 |
| H | 1.48830400  | -0.82361400 | -1.70292200 |
| C | -1.06748100 | 0.50568100  | 1.11568300  |
| H | -1.78428400 | 1.06944300  | 1.71552600  |
| H | -0.39689300 | -0.02810600 | 1.79326800  |
| O | 0.93391400  | 1.26365500  | -0.20106900 |



|                  |             |             |             |
|------------------|-------------|-------------|-------------|
| O                | -0.82868900 | -0.99888900 | -0.73343100 |
| <b>(S, S)-DL</b> |             |             |             |
| O                | 0.87661600  | 2.51835900  | -0.15976300 |
| C                | 0.33608700  | 1.51087300  | 0.23062200  |
| C                | -1.79307400 | 0.17215100  | 0.19587400  |
| H                | -1.63840200 | -0.06105700 | 1.25633400  |
| C                | 1.81146700  | -0.52339900 | 0.22817400  |
| H                | 2.13938400  | -1.36398200 | 0.84690600  |
| C                | -0.21361800 | -1.68103300 | -0.17899800 |
| O                | -0.09303100 | -2.50287800 | 0.69995600  |
| C                | 2.96447100  | 0.05578700  | -0.56924300 |
| C                | -3.21176600 | 0.68678900  | -0.01004500 |
| H                | 3.37644900  | -0.70804700 | -1.23346700 |
| H                | 3.75262200  | 0.39240900  | 0.11045500  |
| H                | 2.63518300  | 0.91033000  | -1.16424700 |
| H                | -3.94065200 | -0.06519100 | 0.30521600  |
| H                | -3.37805100 | 0.92115600  | -1.06523800 |
| H                | -3.36710500 | 1.59744600  | 0.57323300  |
| C                | -1.52346800 | -1.10372400 | -0.64749100 |
| H                | -2.32480700 | -1.82379900 | -0.46958100 |
| H                | -1.48829300 | -0.82346000 | -1.70294200 |
| C                | 1.06753500  | 0.50577200  | 1.11572800  |
| H                | 1.78439600  | 1.06958300  | 1.71545900  |
| H                | 0.39694600  | -0.02790700 | 1.79340400  |
| O                | -0.93388300 | 1.26373000  | -0.20102300 |
| O                | 0.82861400  | -0.99880900 | -0.73332700 |

**R-Chain- (R, R)-DL**

|                         |             |             |             |
|-------------------------|-------------|-------------|-------------|
| <b><sup>1</sup>INT1</b> |             |             |             |
| C                       | -7.71203000 | 1.78167900  | -1.46121700 |
| C                       | -6.66573400 | 2.63249300  | -1.19341600 |
| C                       | -5.41349000 | 2.13103700  | -0.74557400 |
| C                       | -6.34843100 | -0.12916900 | -0.84843400 |
| C                       | -7.54251200 | 0.38604300  | -1.30005500 |
| H                       | -4.44681800 | 4.06394000  | -0.67928100 |
| H                       | -8.66191200 | 2.17456800  | -1.81082700 |
| H                       | -6.77311800 | 3.70430300  | -1.33657100 |
| C                       | -4.31282500 | 2.99641900  | -0.53280700 |
| H                       | -6.23171900 | -1.20032500 | -0.73850400 |
| H                       | -8.36035400 | -0.28637500 | -1.54097800 |
| C                       | -2.93198200 | 1.12417500  | 0.01494500  |
| C                       | -3.06045000 | 2.52127400  | -0.20161700 |
| C                       | -3.81138300 | -1.19200100 | 0.35964900  |
| C                       | -4.67099200 | -1.82659800 | 1.32549800  |
| C                       | -2.75570800 | -1.93085600 | -0.14286100 |
| C                       | -5.67758300 | -1.13006200 | 2.04844300  |
| C                       | -4.49051300 | -3.22274000 | 1.59780800  |
| C                       | -2.48182700 | -3.28231100 | 0.20691100  |
| C                       | -6.49452000 | -1.78640900 | 2.94213100  |
| H                       | -5.79707000 | -0.06482300 | 1.89600700  |
| C                       | -5.36361000 | -3.87356400 | 2.51061500  |
| C                       | -3.39889700 | -3.91745300 | 1.01562600  |
| C                       | -6.35131900 | -3.17555600 | 3.16533100  |
| H                       | -7.25231200 | -1.22943800 | 3.48488200  |
| H                       | -5.22082000 | -4.93477700 | 2.69620000  |
| H                       | -3.24094000 | -4.95947300 | 1.27867100  |
| H                       | -7.00793200 | -3.68228700 | 3.86600900  |
| O                       | -1.91945300 | -1.34859500 | -1.09432300 |
| O                       | -1.66180400 | 0.67041700  | 0.38668400  |
| P                       | -0.82420600 | -0.24159500 | -0.65856500 |
| C                       | -1.17215700 | -3.88861100 | -0.18097800 |
| C                       | -0.84666100 | -4.10496000 | -1.53859300 |

|   |             |             |             |
|---|-------------|-------------|-------------|
| C | 1.07249600  | -4.55097800 | 0.43844700  |
| C | 1.42591000  | -4.73369000 | -0.89917500 |
| H | 1.82266800  | -4.73179900 | 1.20496800  |
| C | -1.90291500 | 3.46329900  | -0.08499500 |
| C | -1.32925100 | 3.74421500  | 1.17792300  |
| C | -1.44084800 | 4.14229200  | -1.23630300 |
| C | -0.35897500 | 4.74478600  | 1.26943400  |
| C | -0.45609200 | 5.12859100  | -1.08689700 |
| C | 0.08543200  | 5.46131400  | 0.15436300  |
| H | 0.06904700  | 4.96790900  | 2.24204000  |
| H | -0.10473500 | 5.65772200  | -1.96875100 |
| C | 2.83122600  | -5.17894100 | -1.27406100 |
| C | 3.36720500  | -4.46637600 | -2.52751200 |
| C | 2.89216800  | -6.70907000 | -1.44103200 |
| H | 3.48785700  | -4.91491100 | -0.43242800 |
| H | 3.21639900  | -3.38630400 | -2.45404800 |
| H | 4.43476600  | -4.67465800 | -2.66043500 |
| H | 2.85802700  | -4.81431100 | -3.43223300 |
| H | 2.56328000  | -7.21929500 | -0.53054800 |
| H | 2.23633700  | -7.02830700 | -2.25853800 |
| H | 3.91070400  | -7.03938700 | -1.67358600 |
| C | -1.87131200 | -3.93748300 | -2.65643100 |
| C | -2.27987900 | -5.31535300 | -3.21259500 |
| C | -1.37648800 | -3.00964000 | -3.77984200 |
| H | -2.77096000 | -3.48435300 | -2.23175800 |
| H | -2.67828500 | -5.95849900 | -2.42124300 |
| H | -3.04767000 | -5.20708000 | -3.98646900 |
| H | -1.42156500 | -5.82882100 | -3.65980500 |
| H | -1.07275800 | -2.03773700 | -3.38536600 |
| H | -0.52552900 | -3.44467000 | -4.31517100 |
| H | -2.17440800 | -2.84866100 | -4.51273500 |
| C | -1.97575700 | 3.84991300  | -2.63846900 |
| C | -0.86749100 | 3.38171700  | -3.59982500 |
| C | -2.72695400 | 5.06736500  | -3.20871800 |
| H | -2.69233700 | 3.02845900  | -2.56650900 |
| H | -0.42996400 | 2.44171400  | -3.25681300 |
| H | -1.28568700 | 3.21481000  | -4.59866000 |
| H | -0.06936600 | 4.12543800  | -3.69525400 |
| H | -3.53999300 | 5.38206400  | -2.54630600 |
| H | -2.05606200 | 5.92362200  | -3.33743800 |
| H | -3.15733400 | 4.82971600  | -4.18746500 |
| C | -1.72764900 | 3.00752300  | 2.45402700  |
| C | -2.29036100 | 3.97181600  | 3.51446100  |
| C | -0.54437100 | 2.18996100  | 3.00972000  |
| H | -2.52705700 | 2.30178200  | 2.21424300  |
| H | -3.13833400 | 4.54042900  | 3.11939300  |
| H | -2.63080700 | 3.41488000  | 4.39404100  |
| H | -1.53399600 | 4.68902300  | 3.84991400  |
| H | -0.21432900 | 1.44511800  | 2.28230800  |
| H | 0.31044800  | 2.83121600  | 3.24987800  |
| H | -0.84034700 | 1.66539600  | 3.92496900  |
| C | 1.11081300  | 6.57714800  | 0.30108200  |
| C | 2.44397700  | 6.08299100  | 0.89391900  |
| C | 0.53582900  | 7.73540500  | 1.13852600  |
| H | 1.31739600  | 6.96587500  | -0.70511200 |
| H | 2.92861300  | 5.35644800  | 0.23786800  |
| H | 3.13420900  | 6.92217200  | 1.03210600  |
| H | 2.30490800  | 5.59941300  | 1.86546500  |
| H | -0.40195800 | 8.10420700  | 0.71153300  |
| H | 0.33100600  | 7.41106100  | 2.16454400  |
| H | 1.24474400  | 8.56901800  | 1.18659500  |
| H | 1.63282900  | 0.68175700  | -2.09329200 |
| C | -3.99239800 | 0.22893900  | -0.05332200 |

|   |             |             |             |
|---|-------------|-------------|-------------|
| C | -5.25401500 | 0.72343500  | -0.53519100 |
| C | -0.20714300 | -4.13844600 | 0.82692800  |
| C | -0.50555000 | -4.00477400 | 2.32109700  |
| C | 0.45907100  | -3.06106100 | 3.05666300  |
| C | -0.53263000 | -5.39527400 | 2.98364400  |
| H | -1.49946000 | -3.57083600 | 2.43792300  |
| H | 0.40495600  | -2.05571200 | 2.63252700  |
| H | 0.18977200  | -2.99829000 | 4.11645500  |
| H | 1.49593000  | -3.41143500 | 3.00514800  |
| H | -1.25558000 | -6.05439300 | 2.49200800  |
| H | 0.44790800  | -5.88027300 | 2.92382300  |
| H | -0.80543700 | -5.31536700 | 4.04158300  |
| O | -0.26425100 | 0.39476100  | -1.87519400 |
| O | 0.20261200  | -0.88649900 | 0.35235500  |
| H | 1.02751300  | -1.23886100 | -0.11004200 |
| C | 0.44173800  | -4.53175600 | -1.86751900 |
| H | 0.68306600  | -4.69530100 | -2.91237200 |
| O | 6.31854600  | -1.63733900 | 2.50124000  |
| C | 5.63390100  | -1.88167200 | 1.53631600  |
| C | 5.55408200  | -1.90474100 | -0.98019900 |
| H | 5.00933900  | -2.85299500 | -0.92287700 |
| C | 3.22732200  | -1.19159600 | 1.76894800  |
| H | 2.20853100  | -1.55348200 | 1.65287400  |
| C | 3.36633500  | -0.86976700 | -0.58142100 |
| O | 2.39170600  | -1.56375700 | -0.86096200 |
| C | 3.35439600  | -0.35138600 | 3.02322700  |
| C | 6.72140100  | -2.05038700 | -1.94607600 |
| H | 2.78515700  | 0.57454300  | 2.91752500  |
| H | 2.96292700  | -0.91822600 | 3.87303100  |
| H | 4.39659300  | -0.10024900 | 3.22608900  |
| H | 6.35751700  | -2.32518500 | -2.94003300 |
| H | 7.27050300  | -1.10734000 | -2.01905600 |
| H | 7.40716500  | -2.82372900 | -1.59206300 |
| C | 4.58971800  | -0.77729000 | -1.43147600 |
| H | 4.31569900  | -0.92200000 | -2.47671700 |
| H | 5.05774300  | 0.19895700  | -1.29998400 |
| C | 4.20247100  | -2.38892900 | 1.68066000  |
| H | 4.15809200  | -2.96585800 | 2.60612100  |
| H | 3.89340100  | -3.03607700 | 0.85674600  |
| O | 6.15569000  | -1.61468500 | 0.30460400  |
| O | 3.55904800  | -0.32956500 | 0.63477500  |
| C | 2.15107700  | 2.45087800  | 0.16054300  |
| C | 3.49586500  | 2.63093000  | 0.83008900  |
| O | 4.55575100  | 2.49021200  | 0.00885200  |
| C | 5.87203900  | 2.81704000  | 0.55394400  |
| O | 3.59642600  | 2.90315600  | 2.01298900  |
| H | 1.52528500  | 3.24625400  | 0.56832500  |
| H | 1.73254900  | 1.51847700  | 0.55302100  |
| H | 5.74654700  | 3.70502500  | 1.18239600  |
| C | 6.73660400  | 3.13438500  | -0.65697400 |
| H | 6.30597700  | 3.95160200  | -1.24220900 |
| H | 7.74105300  | 3.42555300  | -0.33510200 |
| H | 6.82604600  | 2.25610700  | -1.30495600 |
| C | 6.40826200  | 1.66788600  | 1.39477400  |
| H | 5.74037700  | 1.47149200  | 2.23278900  |
| H | 6.51246300  | 0.75718700  | 0.80190700  |
| H | 7.39322700  | 1.93048300  | 1.79412900  |
| O | 2.44842100  | 1.18252600  | -1.91842100 |
| C | 2.69695100  | 3.57034400  | -2.11634700 |
| H | 2.35643600  | 4.53967200  | -1.74116600 |
| H | 3.78096400  | 3.50736400  | -2.01508800 |
| H | 2.43952900  | 3.50454200  | -3.17718700 |
| C | 2.00959300  | 2.43346500  | -1.36785400 |

|                  |             |             |             |
|------------------|-------------|-------------|-------------|
| H                | 0.93392800  | 2.52228600  | -1.54082300 |
| <sup>1</sup> TS1 |             |             |             |
| C                | -7.28435600 | 2.89723000  | -1.56406500 |
| C                | -6.11236300 | 3.56883700  | -1.30754000 |
| C                | -4.96791400 | 2.88073700  | -0.82113200 |
| C                | -6.26806700 | 0.80815400  | -0.86391300 |
| C                | -7.35339700 | 1.49970100  | -1.35297400 |
| H                | -3.68703400 | 4.62188400  | -0.81867000 |
| H                | -8.15059400 | 3.43115800  | -1.94294300 |
| H                | -6.03560300 | 4.63756200  | -1.48933200 |
| C                | -3.73773200 | 3.55445500  | -0.62581600 |
| H                | -6.33481900 | -0.26272100 | -0.71689400 |
| H                | -8.26986200 | 0.96542600  | -1.58505900 |
| C                | -2.69821800 | 1.49900700  | 0.03343500  |
| C                | -2.58995700 | 2.88742200  | -0.25083800 |
| C                | -3.95515700 | -0.63201900 | 0.39659500  |
| C                | -4.91393600 | -1.11552500 | 1.35485900  |
| C                | -3.02559300 | -1.53146100 | -0.09436200 |
| C                | -5.80908600 | -0.26363700 | 2.05766800  |
| C                | -4.95410000 | -2.52013500 | 1.64238500  |
| C                | -2.97366800 | -2.90820800 | 0.26418400  |
| C                | -6.72678800 | -0.77500600 | 2.94835300  |
| H                | -5.76121200 | 0.80525400  | 1.89047600  |
| C                | -5.92578600 | -3.01652500 | 2.55249600  |
| C                | -3.98145500 | -3.38394500 | 1.07403100  |
| C                | -6.80051800 | -2.16675200 | 3.18867700  |
| H                | -7.39626200 | -0.10159200 | 3.47519700  |
| H                | -5.95097500 | -4.08484500 | 2.75063300  |
| H                | -3.99203900 | -4.43567600 | 1.34616900  |
| H                | -7.53409300 | -2.55793200 | 3.88715600  |
| O                | -2.09689300 | -1.08481400 | -1.02583500 |
| O                | -1.53954400 | 0.86363100  | 0.46595900  |
| P                | -0.80787400 | -0.24380400 | -0.49548900 |
| C                | -1.77676300 | -3.71299300 | -0.12840500 |
| C                | -1.49313700 | -3.96635000 | -1.48885900 |
| C                | 0.35403900  | -4.69207400 | 0.47147100  |
| C                | 0.67154300  | -4.91333700 | -0.86933200 |
| H                | 1.07738600  | -4.97782500 | 1.23190300  |
| C                | -1.29254400 | 3.63172300  | -0.16301100 |
| C                | -0.70512800 | 3.91235800  | 1.09337700  |
| C                | -0.70684300 | 4.14533800  | -1.34350900 |
| C                | 0.40328000  | 4.76249000  | 1.14620500  |
| C                | 0.41008700  | 4.98617300  | -1.23313900 |
| C                | 0.96746800  | 5.32975700  | -0.00126300 |
| H                | 0.84003800  | 4.98907800  | 2.11455100  |
| H                | 0.84838200  | 5.39872300  | -2.13832100 |
| C                | 2.00226400  | -5.54407900 | -1.25147700 |
| C                | 2.60082000  | -4.94680000 | -2.53624500 |
| C                | 1.86815700  | -7.07435300 | -1.36695100 |
| H                | 2.70315400  | -5.33767500 | -0.42973800 |
| H                | 2.58086500  | -3.85416400 | -2.50370800 |
| H                | 3.63464100  | -5.28383800 | -2.67099800 |
| H                | 2.04144400  | -5.26446800 | -3.42240400 |
| H                | 1.49541900  | -7.50890700 | -0.43442000 |
| H                | 1.16137600  | -7.33444900 | -2.16271600 |
| H                | 2.83253800  | -7.53810000 | -1.60308600 |
| C                | -2.48622100 | -3.64059900 | -2.60021900 |
| C                | -3.09322600 | -4.93787500 | -3.16853100 |
| C                | -1.86503400 | -2.78209500 | -3.71618400 |
| H                | -3.30840200 | -3.06518600 | -2.16676200 |
| H                | -3.57874800 | -5.52437300 | -2.38183000 |
| H                | -3.83945400 | -4.71094600 | -3.93794600 |

|   |             |             |             |
|---|-------------|-------------|-------------|
| H | -2.32029100 | -5.56649300 | -3.62454800 |
| H | -1.41947200 | -1.87186500 | -3.30967500 |
| H | -1.09092000 | -3.33199800 | -4.26281700 |
| H | -2.63405400 | -2.49518100 | -4.44168000 |
| C | -1.25025600 | 3.82845200  | -2.73661000 |
| C | -0.18789700 | 3.17719700  | -3.64115900 |
| C | -1.84345900 | 5.08560600  | -3.39909900 |
| H | -2.05637600 | 3.09917500  | -2.62871700 |
| H | 0.14004700  | 2.22469000  | -3.22035200 |
| H | -0.61220400 | 2.97781600  | -4.63122000 |
| H | 0.68338800  | 3.82616600  | -3.78121000 |
| H | -2.63128800 | 5.52901700  | -2.78219800 |
| H | -1.07510200 | 5.85085300  | -3.55536800 |
| H | -2.27447600 | 4.83901100  | -4.37531200 |
| C | -1.24110400 | 3.33356900  | 2.39996100  |
| C | -1.63892700 | 4.44048800  | 3.39346800  |
| C | -0.22850800 | 2.35419000  | 3.02631500  |
| H | -2.14768800 | 2.76492800  | 2.17880400  |
| H | -2.36322600 | 5.12916800  | 2.94688200  |
| H | -2.09021600 | 4.00237000  | 4.29001400  |
| H | -0.77216000 | 5.02787200  | 3.71436100  |
| H | -0.04649600 | 1.50982400  | 2.35755900  |
| H | 0.72856200  | 2.84488600  | 3.23577500  |
| H | -0.61653700 | 1.95848200  | 3.97126300  |
| C | 2.13449100  | 6.30461500  | 0.09505400  |
| C | 3.40334500  | 5.66321300  | 0.68975800  |
| C | 1.73408400  | 7.55900600  | 0.89429400  |
| H | 2.37456600  | 6.62654800  | -0.92708900 |
| H | 3.78575800  | 4.86040800  | 0.05291600  |
| H | 4.19722600  | 6.41060800  | 0.79260900  |
| H | 3.21713400  | 5.23688200  | 1.68092600  |
| H | 0.84275000  | 8.02960700  | 0.46837900  |
| H | 1.51243400  | 7.30601700  | 1.93658400  |
| H | 2.54597100  | 8.29418900  | 0.89472300  |
| H | 1.30968500  | 0.29472900  | -1.61598600 |
| C | -3.89564700 | 0.79412200  | -0.03569700 |
| C | -5.04916500 | 1.47513200  | -0.55849300 |
| C | -0.85080400 | -4.10283300 | 0.87045000  |
| C | -1.10813300 | -3.92185700 | 2.36655600  |
| C | -0.01145600 | -3.11238000 | 3.07779400  |
| C | -1.31714700 | -5.29126100 | 3.04020400  |
| H | -2.03150200 | -3.35459500 | 2.49203900  |
| H | 0.05837300  | -2.11424800 | 2.64120400  |
| H | -0.24837600 | -3.01110300 | 4.14255300  |
| H | 0.96827500  | -3.59871100 | 3.00710900  |
| H | -2.13255600 | -5.84651500 | 2.56479200  |
| H | -0.41446900 | -5.90830800 | 2.97035200  |
| H | -1.55942300 | -5.16801100 | 4.10149700  |
| O | -0.16522200 | 0.34772500  | -1.73056300 |
| O | 0.08989000  | -1.04275000 | 0.42814900  |
| H | 1.22164800  | -1.64211500 | -0.31448200 |
| C | -0.28033800 | -4.56930400 | -1.82999100 |
| H | -0.07095400 | -4.75678200 | -2.87770600 |
| O | 5.95238800  | -2.37519500 | 2.30142200  |
| C | 5.20565900  | -2.49258200 | 1.35825000  |
| C | 4.99408300  | -2.41896700 | -1.13418400 |
| H | 4.28736700  | -3.24893300 | -1.05394000 |
| C | 2.92154700  | -1.49603800 | 1.69736200  |
| H | 1.86027600  | -1.71690500 | 1.62856800  |
| C | 3.00679100  | -0.95577800 | -0.66754700 |
| O | 2.07175700  | -1.85247000 | -0.88062500 |
| C | 3.21174100  | -0.74816400 | 2.98446400  |
| C | 6.05820000  | -2.76170600 | -2.16804900 |

|   |            |             |             |
|---|------------|-------------|-------------|
| H | 2.70078200 | 0.21597000  | 2.99240700  |
| H | 2.84983200 | -1.34571700 | 3.82610400  |
| H | 4.28096500 | -0.57803900 | 3.11589000  |
| H | 5.59424500 | -2.95941400 | -3.13848200 |
| H | 6.76530700 | -1.93396000 | -2.27623300 |
| H | 6.61242200 | -3.64916200 | -1.85384000 |
| C | 4.24151600 | -1.12991000 | -1.51332200 |
| H | 3.93557400 | -1.18235200 | -2.55954400 |
| H | 4.89010100 | -0.26481700 | -1.36430900 |
| C | 3.72697900 | -2.80257100 | 1.53164200  |
| H | 3.62970200 | -3.39105300 | 2.44591600  |
| H | 3.30803500 | -3.37829500 | 0.70599400  |
| O | 5.71044500 | -2.26138900 | 0.11420900  |
| O | 3.28644500 | -0.58882700 | 0.60406500  |
| C | 2.60173300 | 2.14545600  | 0.44146000  |
| C | 3.98223100 | 2.11781700  | 1.05842700  |
| O | 4.98240500 | 1.88901600  | 0.18508100  |
| C | 6.35385700 | 2.01548600  | 0.68367300  |
| O | 4.15393000 | 2.34607300  | 2.23932700  |
| H | 2.21929500 | 3.14394800  | 0.65851400  |
| H | 1.97357000 | 1.46977800  | 1.02343600  |
| H | 6.36568400 | 2.87043900  | 1.36719400  |
| C | 7.19935500 | 2.29945000  | -0.54837100 |
| H | 6.84746800 | 3.19575100  | -1.06694300 |
| H | 8.24348800 | 2.45068400  | -0.25894600 |
| H | 7.15804800 | 1.45543500  | -1.24509700 |
| C | 6.76454800 | 0.75301700  | 1.42477100  |
| H | 6.11818600 | 0.58951300  | 2.28675200  |
| H | 6.71140000 | -0.12260500 | 0.77487200  |
| H | 7.79373200 | 0.85361100  | 1.78409400  |
| O | 2.31333800 | 0.48529300  | -1.42517800 |
| C | 3.22392000 | 2.64881800  | -2.04448000 |
| H | 3.18667000 | 3.72155300  | -1.83345200 |
| H | 4.26050000 | 2.31917500  | -2.00035500 |
| H | 2.83109500 | 2.48855100  | -3.05151900 |
| C | 2.35030900 | 1.90760500  | -1.04428400 |
| H | 1.31536600 | 2.22287600  | -1.19759800 |

**INT2**

|   |             |             |             |
|---|-------------|-------------|-------------|
| C | -7.11816400 | 3.15509500  | -1.83662200 |
| C | -5.91995800 | 3.77719900  | -1.57624400 |
| C | -4.82694600 | 3.05436800  | -1.02622500 |
| C | -6.23398300 | 1.05078800  | -1.01389600 |
| C | -7.26765500 | 1.77451200  | -1.56437600 |
| H | -3.46290800 | 4.73135600  | -1.04102500 |
| H | -7.94451000 | 3.71483300  | -2.26400000 |
| H | -5.78290200 | 4.83121200  | -1.80234500 |
| C | -3.57106000 | 3.67488300  | -0.81614100 |
| H | -6.36127400 | -0.00694400 | -0.81882600 |
| H | -8.20528800 | 1.27901200  | -1.79746600 |
| C | -2.66188600 | 1.60129200  | -0.04641000 |
| C | -2.47074700 | 2.97010100  | -0.37412700 |
| C | -4.03019200 | -0.44881100 | 0.36888500  |
| C | -5.02101600 | -0.84094900 | 1.33577000  |
| C | -3.13949200 | -1.41411500 | -0.06045800 |
| C | -5.89363400 | 0.08225700  | 1.97344400  |
| C | -5.11366200 | -2.22446000 | 1.70366900  |
| C | -3.13878900 | -2.76836000 | 0.36974500  |
| C | -6.83929800 | -0.34378700 | 2.87946200  |
| H | -5.80640000 | 1.13704100  | 1.74436300  |
| C | -6.11250100 | -2.63158200 | 2.62871000  |
| C | -4.16837700 | -3.15577800 | 1.19916300  |
| C | -6.96385700 | -1.71542500 | 3.20094900  |

|   |             |             |             |
|---|-------------|-------------|-------------|
| H | -7.49143900 | 0.38198300  | 3.35592900  |
| H | -6.17771000 | -3.68442100 | 2.88968000  |
| H | -4.21931900 | -4.18736800 | 1.53408300  |
| H | -7.71861400 | -2.03862800 | 3.91137900  |
| O | -2.16659600 | -1.04568100 | -0.99616700 |
| O | -1.54051300 | 0.92285500  | 0.44206800  |
| P | -0.87041800 | -0.27760700 | -0.42107100 |
| C | -1.97491600 | -3.64184500 | 0.02480100  |
| C | -1.73314900 | -4.02260200 | -1.31377800 |
| C | 0.11282800  | -4.67630300 | 0.67447800  |
| C | 0.38313300  | -5.04348800 | -0.64418400 |
| H | 0.83601000  | -4.93354800 | 1.44395400  |
| C | -1.14297800 | 3.65093900  | -0.23913700 |
| C | -0.61584200 | 3.93844900  | 1.04187900  |
| C | -0.45891200 | 4.08804800  | -1.39710500 |
| C | 0.54982000  | 4.70441200  | 1.13620400  |
| C | 0.70539700  | 4.85294000  | -1.24395400 |
| C | 1.22224600  | 5.18561200  | 0.00867900  |
| H | 0.94046600  | 4.93726400  | 2.12245900  |
| H | 1.22364600  | 5.20508300  | -2.13173000 |
| C | 1.65585100  | -5.80000200 | -0.99203100 |
| C | 2.36118000  | -5.22722300 | -2.23399400 |
| C | 1.36782100  | -7.30308900 | -1.16518800 |
| H | 2.33945000  | -5.68901800 | -0.13960800 |
| H | 2.46683800  | -4.14184000 | -2.15924700 |
| H | 3.35248900  | -5.67829800 | -2.35337200 |
| H | 1.79589700  | -5.44288900 | -3.14721500 |
| H | 0.91458400  | -7.72521700 | -0.26293600 |
| H | 0.67249900  | -7.46598600 | -1.99626300 |
| H | 2.28873400  | -7.85642200 | -1.38013700 |
| C | -2.72513500 | -3.72392900 | -2.43363800 |
| C | -3.39562500 | -5.02294900 | -2.91982900 |
| C | -2.07697500 | -2.96126600 | -3.60271700 |
| H | -3.51711100 | -3.08719200 | -2.02904300 |
| H | -3.89590700 | -5.54089200 | -2.09529700 |
| H | -4.14109200 | -4.80768600 | -3.69327900 |
| H | -2.65732800 | -5.71063500 | -3.34658600 |
| H | -1.60029100 | -2.04231700 | -3.25451700 |
| H | -1.32029100 | -3.57024200 | -4.10887400 |
| H | -2.83517300 | -2.69512300 | -4.34727200 |
| C | -0.94452000 | 3.76378100  | -2.80916400 |
| C | 0.14979900  | 3.10486300  | -3.66838200 |
| C | -1.49492000 | 5.02140000  | -3.50746200 |
| H | -1.76065700 | 3.04106600  | -2.72927200 |
| H | 0.51089400  | 2.18602700  | -3.20330600 |
| H | -0.25307400 | 2.84585800  | -4.65315400 |
| H | 1.00335100  | 3.77201900  | -3.82719200 |
| H | -2.31307600 | 5.47171800  | -2.93764700 |
| H | -0.71263700 | 5.78018000  | -3.61996800 |
| H | -1.87171100 | 4.77520800  | -4.50598100 |
| C | -1.28071000 | 3.46130400  | 2.33010900  |
| C | -1.68349300 | 4.64348700  | 3.23074600  |
| C | -0.38262400 | 2.46134600  | 3.08303000  |
| H | -2.20261500 | 2.93586200  | 2.06824800  |
| H | -2.33462800 | 5.34267800  | 2.69635100  |
| H | -2.21975600 | 4.28275500  | 4.11484100  |
| H | -0.80840700 | 5.20134400  | 3.58034800  |
| H | -0.17040200 | 1.58758400  | 2.46296300  |
| H | 0.57079400  | 2.91605300  | 3.37272100  |
| H | -0.87923400 | 2.11709900  | 3.99656900  |
| C | 2.44691900  | 6.08227500  | 0.13999300  |
| C | 3.58087400  | 5.45267600  | 0.97095400  |
| C | 2.04453100  | 7.45131800  | 0.72191400  |

|   |             |             |             |
|---|-------------|-------------|-------------|
| H | 2.83501900  | 6.25294600  | -0.87312300 |
| H | 3.95659200  | 4.53006800  | 0.52087300  |
| H | 4.42178300  | 6.14950600  | 1.05217700  |
| H | 3.25137400  | 5.21727700  | 1.98847400  |
| H | 1.26025600  | 7.92040300  | 0.11998700  |
| H | 1.66137000  | 7.34104900  | 1.74224800  |
| H | 2.90483500  | 8.12834100  | 0.75681200  |
| H | 0.75252600  | 0.25173100  | -1.67875000 |
| C | -3.88827400 | 0.95204600  | -0.12295900 |
| C | -4.99016900 | 1.66797400  | -0.70590100 |
| C | -1.04463300 | -3.97860900 | 1.03765300  |
| C | -1.25645800 | -3.62875200 | 2.51018400  |
| C | -0.04061300 | -2.94601400 | 3.15870000  |
| C | -1.66269700 | -4.88866900 | 3.29904100  |
| H | -2.08247400 | -2.91751100 | 2.57859100  |
| H | 0.22026700  | -2.03436400 | 2.61938600  |
| H | -0.27082200 | -2.68327300 | 4.19688700  |
| H | 0.83643600  | -3.60172000 | 3.17970500  |
| H | -2.55821200 | -5.35583000 | 2.87654200  |
| H | -0.86111200 | -5.63537000 | 3.27768400  |
| H | -1.86682100 | -4.64173400 | 4.34663800  |
| O | -0.26000200 | 0.29558500  | -1.75500700 |
| O | 0.06854600  | -1.05011400 | 0.43345900  |
| H | 1.36755900  | -1.82351000 | -0.66939600 |
| C | -0.56397700 | -4.72271700 | -1.61924000 |
| H | -0.38524700 | -5.01659600 | -2.64867300 |
| O | 6.16663200  | -2.69743100 | 1.70389200  |
| C | 5.39830300  | -2.68974300 | 0.76878600  |
| C | 5.06967900  | -2.14827200 | -1.64428400 |
| H | 4.40421000  | -3.01303400 | -1.70378300 |
| C | 3.06060500  | -1.94824900 | 1.31971200  |
| H | 2.01813000  | -2.25028100 | 1.20742300  |
| C | 2.99053300  | -0.82079800 | -0.87547500 |
| O | 2.17114900  | -1.87131200 | -1.23321700 |
| C | 3.29865400  | -1.50113300 | 2.75286000  |
| C | 6.10236400  | -2.23134000 | -2.76227000 |
| H | 2.70115700  | -0.61635400 | 2.97716900  |
| H | 3.01229200  | -2.30667700 | 3.43502500  |
| H | 4.34818800  | -1.25866700 | 2.92327000  |
| H | 5.60746600  | -2.25708900 | -3.73749400 |
| H | 6.76948500  | -1.36452800 | -2.72963200 |
| H | 6.70733900  | -3.13419600 | -2.64933000 |
| C | 4.25664600  | -0.85305900 | -1.72862500 |
| H | 3.94977700  | -0.69292400 | -2.76584700 |
| H | 4.89037700  | -0.02060600 | -1.41641500 |
| C | 3.95527700  | -3.13736400 | 0.89762000  |
| H | 3.92564700  | -3.89745800 | 1.68125000  |
| H | 3.56352800  | -3.56968100 | -0.02166800 |
| O | 5.84366400  | -2.20265700 | -0.41961500 |
| O | 3.32624800  | -0.79480800 | 0.48981100  |
| C | 2.65696600  | 1.87443400  | 0.77737700  |
| C | 4.00796400  | 1.72156800  | 1.44134700  |
| O | 5.04824400  | 1.85604000  | 0.59312800  |
| C | 6.39235900  | 1.88778300  | 1.17070900  |
| O | 4.12696500  | 1.59590500  | 2.64222500  |
| H | 2.33266000  | 2.88702900  | 1.03404900  |
| H | 1.97205000  | 1.19967000  | 1.29077100  |
| H | 6.32582100  | 2.44943700  | 2.10787800  |
| C | 7.24280400  | 2.63541700  | 0.15491800  |
| H | 6.83702700  | 3.63308900  | -0.03622300 |
| H | 8.26614500  | 2.73977900  | 0.52766600  |
| H | 7.27857000  | 2.08736400  | -0.79240400 |
| C | 6.87272200  | 0.47207700  | 1.44517000  |



|   |            |             |             |
|---|------------|-------------|-------------|
| H | 6.22781600 | -0.02119900 | 2.17125900  |
| H | 6.87882100 | -0.12798600 | 0.53250200  |
| H | 7.88896600 | 0.49534800  | 1.85166000  |
| O | 2.22295300 | 0.36587400  | -1.19502900 |
| C | 3.38066700 | 2.47539500  | -1.68001100 |
| H | 3.37350700 | 3.54022900  | -1.43309900 |
| H | 4.40646600 | 2.12118800  | -1.62224400 |
| H | 3.00997200 | 2.36345600  | -2.70229700 |
| C | 2.44209300 | 1.73338200  | -0.73304000 |
| H | 1.44609100 | 2.15774900  | -0.89097900 |

### **<sup>1</sup>INT3**

|   |             |             |             |
|---|-------------|-------------|-------------|
| C | -0.92544900 | 7.44554400  | 1.63855000  |
| C | -1.87385800 | 6.45523900  | 1.74719700  |
| C | -1.64312700 | 5.15921600  | 1.21221300  |
| C | 0.55363500  | 5.93576900  | 0.44910800  |
| C | 0.30456000  | 7.17568600  | 0.99371900  |
| H | -3.52575600 | 4.34032500  | 1.89375600  |
| H | -1.11160400 | 8.42957500  | 2.05804000  |
| H | -2.81310800 | 6.64393500  | 2.26012300  |
| C | -2.59545400 | 4.11986300  | 1.38067600  |
| H | 1.50147400  | 5.73921300  | -0.03747200 |
| H | 1.06135200  | 7.95194500  | 0.93202200  |
| C | -1.14375800 | 2.61779400  | 0.23567800  |
| C | -2.35342300 | 2.83527300  | 0.94514800  |
| C | 0.98211200  | 3.24517300  | -0.87912300 |
| C | 1.30766700  | 3.97786800  | -2.07247800 |
| C | 1.76324400  | 2.14385100  | -0.55952000 |
| C | 0.48849000  | 5.01823500  | -2.59192100 |
| C | 2.49455900  | 3.62980700  | -2.79590500 |
| C | 2.90144700  | 1.73536700  | -1.30446500 |
| C | 0.85081800  | 5.70663500  | -3.72783500 |
| H | -0.43756000 | 5.26450700  | -2.08764900 |
| C | 2.84910900  | 4.37257200  | -3.95423200 |
| C | 3.27163000  | 2.52212500  | -2.37364800 |
| C | 2.05015700  | 5.39442900  | -4.41035600 |
| H | 0.20542800  | 6.49323700  | -4.10711500 |
| H | 3.75858400  | 4.10263400  | -4.48423600 |
| H | 4.17018200  | 2.27003100  | -2.92790700 |
| H | 2.32661400  | 5.95031700  | -5.30109500 |
| O | 1.46238300  | 1.40562700  | 0.58967800  |
| O | -0.92289000 | 1.32098800  | -0.24146200 |
| P | 0.14184400  | 0.44960600  | 0.59751000  |
| C | 3.67470400  | 0.50674600  | -0.93154700 |
| C | 4.62667400  | 0.57190800  | 0.10803300  |
| C | 4.22775600  | -1.82073900 | -1.27378400 |
| C | 5.18360100  | -1.78035200 | -0.25612300 |
| H | 4.07282600  | -2.75652300 | -1.80185100 |
| C | -3.28399800 | 1.68861900  | 1.18734800  |
| C | -3.97966400 | 1.11340400  | 0.09986300  |
| C | -3.42275600 | 1.14650000  | 2.48619800  |
| C | -4.81452300 | 0.01946300  | 0.33700100  |
| C | -4.29145800 | 0.06411500  | 2.66948100  |
| C | -4.99420700 | -0.51640700 | 1.61389900  |
| H | -5.34391000 | -0.42437900 | -0.49962900 |
| H | -4.41306800 | -0.35143500 | 3.66544400  |
| C | 6.04359800  | -3.00098000 | 0.04303900  |
| C | 6.09287900  | -3.36214400 | 1.53712300  |
| C | 7.46498300  | -2.79947700 | -0.51695300 |
| H | 5.59371400  | -3.85141000 | -0.48651900 |
| H | 5.09464200  | -3.56116400 | 1.93462500  |
| H | 6.70344600  | -4.25850500 | 1.69147900  |
| H | 6.54353400  | -2.55797800 | 2.12902500  |

|   |             |             |             |
|---|-------------|-------------|-------------|
| H | 7.43876000  | -2.58214700 | -1.58907900 |
| H | 7.95907500  | -1.95826700 | -0.01801900 |
| H | 8.07848600  | -3.69360900 | -0.36043800 |
| C | 4.87939600  | 1.85882000  | 0.88904600  |
| C | 6.35005600  | 2.30259800  | 0.79201800  |
| C | 4.42970600  | 1.72612500  | 2.35523200  |
| H | 4.27703300  | 2.65224700  | 0.43735700  |
| H | 6.66031100  | 2.41095200  | -0.25205500 |
| H | 6.49292400  | 3.26547200  | 1.29419100  |
| H | 7.02222500  | 1.57965200  | 1.26638700  |
| H | 3.36198100  | 1.50378400  | 2.41526300  |
| H | 4.97685000  | 0.92569800  | 2.86632200  |
| H | 4.61497800  | 2.65770900  | 2.90101100  |
| C | -2.67192500 | 1.70976900  | 3.69125800  |
| C | -2.09621100 | 0.62166800  | 4.61509300  |
| C | -3.57876000 | 2.65743600  | 4.50132200  |
| H | -1.82387800 | 2.28872300  | 3.31478400  |
| H | -1.49644500 | -0.09917800 | 4.06044500  |
| H | -1.45571700 | 1.08516600  | 5.37345100  |
| H | -2.88470800 | 0.08032600  | 5.14925100  |
| H | -3.95725900 | 3.48256400  | 3.89173200  |
| H | -4.44483200 | 2.11355700  | 4.89517700  |
| H | -3.03305500 | 3.08452700  | 5.35003100  |
| C | -3.87053600 | 1.65228700  | -1.32482600 |
| C | -5.23559300 | 2.15477100  | -1.83207000 |
| C | -3.27704600 | 0.60563400  | -2.28399100 |
| H | -3.19816600 | 2.51474800  | -1.31963000 |
| H | -5.65407000 | 2.91055100  | -1.15983100 |
| H | -5.13501500 | 2.59828900  | -2.82867400 |
| H | -5.96016900 | 1.33619200  | -1.90438300 |
| H | -2.27674700 | 0.30284000  | -1.97047600 |
| H | -3.90242600 | -0.28872500 | -2.31561500 |
| H | -3.20874700 | 1.00475400  | -3.30153900 |
| C | -5.91463500 | -1.70642700 | 1.84260900  |
| C | -5.34066900 | -2.98604900 | 1.20665500  |
| C | -7.34276000 | -1.43656400 | 1.33630100  |
| H | -5.97273600 | -1.87131100 | 2.92653600  |
| H | -4.35614100 | -3.22110200 | 1.62231100  |
| H | -6.00032600 | -3.84237900 | 1.38642100  |
| H | -5.22944500 | -2.86893200 | 0.12303500  |
| H | -7.75648200 | -0.52788000 | 1.78407800  |
| H | -7.36054800 | -1.31076400 | 0.24820300  |
| H | -8.00441500 | -2.27423700 | 1.58216900  |
| C | 2.67277400  | -1.57307500 | 2.44415400  |
| C | 0.53963900  | -5.10881700 | 1.68581900  |
| C | 1.86559700  | -1.62080400 | 3.77291500  |
| H | 2.47130300  | -0.66359000 | 1.87981100  |
| H | 2.30936400  | -2.40707400 | 4.39354200  |
| H | 0.22608700  | -4.39574800 | 2.45230000  |
| H | 3.74567500  | -1.60743200 | 2.64765100  |
| H | 0.18844900  | -6.10191300 | 1.99198200  |
| C | 2.27505100  | -2.75678700 | 1.61435700  |
| O | 1.60621700  | -2.71281000 | 0.58188900  |
| C | -0.18046400 | -4.83411000 | 0.37641500  |
| O | 0.05765700  | -5.42798600 | -0.65753200 |
| O | 2.65150000  | -3.90385200 | 2.15993400  |
| O | 0.52983200  | -2.04773100 | 3.53885100  |
| C | 2.76634000  | -5.55727800 | 0.34840300  |
| H | 3.84692400  | -5.60475200 | 0.51126300  |
| H | 2.40522200  | -6.53491400 | 0.02281200  |
| H | 2.54647400  | -4.84336000 | -0.44363700 |
| C | 1.92537700  | -0.28146200 | 4.50414000  |
| H | 2.96002500  | 0.01065100  | 4.71357100  |

|   |             |             |             |
|---|-------------|-------------|-------------|
| H | 1.45642500  | 0.49711200  | 3.89609300  |
| H | 1.38097300  | -0.35488600 | 5.44956800  |
| O | -1.16940000 | -3.93688000 | 0.54286100  |
| H | 0.10491900  | -1.36837600 | 2.97863300  |
| O | -3.73676000 | -2.85024300 | -2.62549800 |
| C | -4.67285000 | -2.54139700 | -3.70294400 |
| H | -4.32766000 | -1.62364900 | -4.18763600 |
| C | -6.01959600 | -2.32626400 | -3.03065700 |
| H | -5.97756400 | -1.49370200 | -2.32426000 |
| H | -6.78144800 | -2.10059800 | -3.78271300 |
| H | -6.32587300 | -3.22495600 | -2.48605500 |
| C | -2.41623400 | -2.70018100 | -2.88883300 |
| O | -1.98806300 | -2.23872200 | -3.92654200 |
| C | -4.67628500 | -3.68691300 | -4.70867000 |
| H | -3.68449600 | -3.80797400 | -5.14827500 |
| H | -4.96985900 | -4.62192800 | -4.22053300 |
| H | -5.38864000 | -3.47801200 | -5.51299500 |
| C | -2.16953300 | -3.75697500 | -0.51774000 |
| H | -2.82416800 | -3.00029400 | -0.08320500 |
| C | -0.20096600 | 3.59206300  | -0.03966400 |
| C | -0.41439500 | 4.89756200  | 0.52067800  |
| C | 3.46354800  | -0.70470600 | -1.63256400 |
| C | 2.45567200  | -0.81440400 | -2.77727600 |
| C | 1.78176800  | -2.19631600 | -2.88095300 |
| C | 3.11592400  | -0.47601600 | -4.12929400 |
| H | 1.66648200  | -0.08011900 | -2.59138200 |
| H | 1.49007900  | -2.58898800 | -1.90679900 |
| H | 0.88325100  | -2.12796300 | -3.50181000 |
| H | 2.44769400  | -2.93264400 | -3.34564700 |
| H | 3.50784900  | 0.54271700  | -4.15274200 |
| H | 3.94631500  | -1.16246900 | -4.32991000 |
| H | 2.38832000  | -0.57688500 | -4.94172000 |
| C | -1.51259100 | -3.17119500 | -1.77011700 |
| H | -0.91179800 | -2.30488200 | -1.48367600 |
| H | -0.82414800 | -3.89473300 | -2.21083000 |
| C | -2.94796200 | -5.05439800 | -0.71563300 |
| H | -3.81786000 | -4.86519100 | -1.34455800 |
| H | -2.32331000 | -5.81644400 | -1.18442600 |
| H | -3.29320500 | -5.42455600 | 0.25418600  |
| C | 2.08365300  | -5.16312600 | 1.65144500  |
| H | 2.39712700  | -5.85066000 | 2.44029400  |
| O | -0.19926300 | 0.11532900  | 2.00141400  |
| O | 0.37829500  | -0.72838000 | -0.40977600 |
| H | 0.89341500  | -1.50426500 | 0.00354500  |
| C | 5.36479200  | -0.57348000 | 0.42390500  |
| H | 6.10447200  | -0.51645600 | 1.21738800  |

**R-Chain- (S, S)-DL  
2INT1**

|   |             |            |             |
|---|-------------|------------|-------------|
| C | -0.43140400 | 6.34718000 | 3.54804000  |
| C | -1.49012400 | 5.69244600 | 2.96266300  |
| C | -1.27532000 | 4.69268800 | 1.97604800  |
| C | 1.13607500  | 5.06990300 | 2.20834300  |
| C | 0.89375500  | 6.02302800 | 3.17214300  |
| H | -3.37373300 | 4.25514900 | 1.67959300  |
| H | -0.60823500 | 7.10503800 | 4.30527700  |
| H | -2.51150000 | 5.92157700 | 3.25469000  |
| C | -2.36056400 | 3.99065000 | 1.39152400  |
| H | 2.15482000  | 4.82660300 | 1.93024900  |
| H | 1.72730000  | 6.52800700 | 3.65108500  |
| C | -0.82773400 | 2.66791900 | 0.12910600  |
| C | -2.16743500 | 2.95834100 | 0.49725500  |
| C | 1.59879200  | 3.13931700 | -0.05664100 |

|   |             |             |             |
|---|-------------|-------------|-------------|
| C | 2.30269900  | 4.21438400  | -0.70210300 |
| C | 2.16482900  | 1.87020100  | -0.06697600 |
| C | 1.72896800  | 5.49942300  | -0.91459900 |
| C | 3.62433600  | 3.97957700  | -1.19474000 |
| C | 3.49773400  | 1.63254900  | -0.49879100 |
| C | 2.43804400  | 6.49640700  | -1.54572900 |
| H | 0.71459200  | 5.68913500  | -0.58692100 |
| C | 4.33661500  | 5.03377900  | -1.82742400 |
| C | 4.19506400  | 2.69512800  | -1.03875000 |
| C | 3.76005500  | 6.27011800  | -1.99735000 |
| H | 1.97453500  | 7.46551100  | -1.70438300 |
| H | 5.34374200  | 4.83734900  | -2.18521100 |
| H | 5.22151200  | 2.53364900  | -1.35466000 |
| H | 4.30870000  | 7.06849500  | -2.48778200 |
| O | 1.44558900  | 0.78362700  | 0.44171200  |
| O | -0.61914400 | 1.64176400  | -0.79197000 |
| P | 0.04765400  | 0.27173300  | -0.24130000 |
| C | 4.25430400  | 0.34827100  | -0.32490400 |
| C | 5.03002700  | 0.16953700  | 0.84616600  |
| C | 5.32871800  | -1.57346100 | -1.32141700 |
| C | 6.15131700  | -1.73325100 | -0.20778800 |
| H | 5.43218900  | -2.26661700 | -2.14912900 |
| C | -3.30282000 | 2.18237300  | -0.08305100 |
| C | -3.57775200 | 2.26714400  | -1.46885400 |
| C | -4.10842600 | 1.37306700  | 0.74907500  |
| C | -4.65770300 | 1.55083200  | -1.98873700 |
| C | -5.17465200 | 0.67187200  | 0.17296300  |
| C | -5.47031900 | 0.74508800  | -1.18874800 |
| H | -4.87378500 | 1.63202000  | -3.04929200 |
| H | -5.78363600 | 0.03370600  | 0.80393600  |
| C | 7.22299400  | -2.81300600 | -0.17858000 |
| C | 6.99790400  | -3.83182400 | 0.95225500  |
| C | 8.62890000  | -2.19146600 | -0.08685900 |
| H | 7.15828300  | -3.35948100 | -1.12759000 |
| H | 6.04087900  | -4.34306500 | 0.82650100  |
| H | 7.78911100  | -4.58937700 | 0.95225800  |
| H | 7.00413400  | -3.34547100 | 1.93410700  |
| H | 8.80201100  | -1.48615100 | -0.90553700 |
| H | 8.75696500  | -1.64632700 | 0.85491100  |
| H | 9.40115600  | -2.96721000 | -0.13169300 |
| C | 4.83210700  | 1.06812600  | 2.06438500  |
| C | 6.12326200  | 1.34458300  | 2.84985300  |
| C | 3.74737900  | 0.47501800  | 2.98727000  |
| H | 4.46144200  | 2.03470200  | 1.70768900  |
| H | 6.92090400  | 1.70574600  | 2.19333100  |
| H | 5.93957900  | 2.10379000  | 3.61697700  |
| H | 6.48954500  | 0.44978600  | 3.36460900  |
| H | 2.79681900  | 0.36724600  | 2.45889900  |
| H | 4.05579300  | -0.51292200 | 3.35028800  |
| H | 3.58207100  | 1.11830900  | 3.85871800  |
| C | -3.88145000 | 1.24163500  | 2.25416500  |
| C | -3.65651300 | -0.21702800 | 2.68684800  |
| C | -5.04727100 | 1.87553500  | 3.03630400  |
| H | -2.97346200 | 1.78930000  | 2.51581400  |
| H | -2.75848700 | -0.61631400 | 2.21190900  |
| H | -3.51751700 | -0.27147200 | 3.77248700  |
| H | -4.50610000 | -0.85545200 | 2.42552600  |
| H | -5.19653900 | 2.92296800  | 2.75374300  |
| H | -5.98610300 | 1.34519000  | 2.84212800  |
| H | -4.85633000 | 1.83584900  | 4.11436300  |
| C | -2.77077100 | 3.14877500  | -2.41937800 |
| C | -3.63692700 | 4.29576100  | -2.97369100 |
| C | -2.13077800 | 2.33064900  | -3.55547900 |

|   |             |             |             |
|---|-------------|-------------|-------------|
| H | -1.95674000 | 3.61433600  | -1.85859600 |
| H | -4.05921600 | 4.89779700  | -2.16258600 |
| H | -3.03887700 | 4.95355900  | -3.61395400 |
| H | -4.46960200 | 3.91295900  | -3.57344700 |
| H | -1.50382700 | 1.53144100  | -3.15419200 |
| H | -2.89255900 | 1.88030000  | -4.20109600 |
| H | -1.50609100 | 2.97665700  | -4.18216700 |
| C | -6.68237900 | 0.02310200  | -1.75798400 |
| C | -6.39233300 | -0.71445100 | -3.07471500 |
| C | -7.85574000 | 1.00821100  | -1.92490900 |
| H | -6.98479300 | -0.72883600 | -1.01989400 |
| H | -5.56847100 | -1.42200500 | -2.96219200 |
| H | -7.27465700 | -1.27999800 | -3.39177900 |
| H | -6.14520200 | -0.01385700 | -3.87958500 |
| H | -8.09787600 | 1.49945300  | -0.97698400 |
| H | -7.60054100 | 1.78967100  | -2.64938700 |
| H | -8.75206300 | 0.49136200  | -2.28570400 |
| C | 3.35188300  | -3.34057300 | 1.24568900  |
| C | 0.28881400  | -4.97144700 | -0.30314700 |
| C | 1.91050200  | -2.83792500 | 1.48834400  |
| H | 3.98963300  | -2.53389000 | 0.89452600  |
| H | -0.11393000 | -5.08508500 | 0.70271400  |
| H | 3.75716800  | -3.72999000 | 2.18528100  |
| H | -0.47613900 | -5.28748200 | -1.01453600 |
| C | 3.33727800  | -4.41993900 | 0.19055100  |
| O | 3.90950500  | -4.38657500 | -0.87225300 |
| C | 0.50897200  | -3.49796200 | -0.58233800 |
| O | 0.03833400  | -2.98857300 | -1.59924500 |
| O | 2.47896100  | -5.42257700 | 0.54906300  |
| O | 1.25147300  | -2.68898400 | 0.17763500  |
| O | -1.60279800 | -3.05321200 | 1.08087000  |
| H | -1.40902800 | -2.09793300 | 0.97783600  |
| O | -5.77435900 | -2.57938800 | 0.71092800  |
| C | -7.18244200 | -2.95519000 | 0.73852400  |
| H | -7.59083000 | -2.79092500 | -0.26320700 |
| C | -7.84192900 | -2.03033700 | 1.74938400  |
| H | -7.75569400 | -0.98541300 | 1.43951800  |
| H | -8.90443200 | -2.27415300 | 1.84317500  |
| H | -7.37276200 | -2.14006700 | 2.73205000  |
| C | -5.06505000 | -2.90338900 | -0.40154900 |
| O | -5.56069700 | -3.41598900 | -1.38348100 |
| C | -7.29472400 | -4.43194100 | 1.09903100  |
| H | -6.79538000 | -5.04279700 | 0.34363900  |
| H | -6.83576200 | -4.62029700 | 2.07504100  |
| H | -8.34607300 | -4.73257600 | 1.14611100  |
| C | -2.99800500 | -3.30302900 | 1.00165800  |
| H | -3.50122500 | -2.92935900 | 1.90298800  |
| C | 0.26774900  | 3.38840100  | 0.55996500  |
| C | 0.06486100  | 4.38611900  | 1.57242500  |
| C | 4.37500900  | -0.55087300 | -1.40110800 |
| C | 3.53056000  | -0.39840000 | -2.66051500 |
| C | 2.93563600  | -1.73726600 | -3.12654000 |
| C | 4.34001300  | 0.26791300  | -3.78809200 |
| H | 2.68830600  | 0.25660700  | -2.42194100 |
| H | 2.43793300  | -2.25250200 | -2.30435300 |
| H | 2.20023900  | -1.56493100 | -3.91864300 |
| H | 3.70286600  | -2.40957100 | -3.52408300 |
| H | 4.69167400  | 1.26064700  | -3.49106300 |
| H | 5.21592000  | -0.33792500 | -4.04650800 |
| H | 3.72673800  | 0.38017200  | -4.68882800 |
| C | -3.60248100 | -2.58085500 | -0.22108400 |
| H | -3.49076400 | -1.49890800 | -0.09232400 |
| H | -3.06864600 | -2.88286600 | -1.12489200 |

|   |             |             |             |
|---|-------------|-------------|-------------|
| C | -3.17952300 | -4.81555200 | 0.93269900  |
| H | -4.23651600 | -5.08826400 | 0.99851700  |
| H | -2.77890600 | -5.20919900 | -0.00662700 |
| H | -2.64982700 | -5.28946400 | 1.76429900  |
| C | 1.53952800  | -5.85247700 | -0.46655300 |
| O | -0.74064500 | -0.47212600 | 0.77438100  |
| O | 0.36519300  | -0.41906400 | -1.61078700 |
| H | 0.25153400  | -1.42986600 | -1.61997800 |
| C | 5.96441300  | -0.86937700 | 0.87838500  |
| H | 6.57594300  | -1.00188300 | 1.76494400  |
| C | 1.24167400  | -7.32272800 | -0.23116300 |
| H | 0.52118800  | -7.68804900 | -0.96867000 |
| H | 2.15977100  | -7.90881900 | -0.31743100 |
| H | 0.82395500  | -7.47393200 | 0.76894100  |
| H | 1.99640900  | -5.70402900 | -1.44973200 |
| C | 1.12278700  | -3.59214900 | 2.54959700  |
| H | 1.55308000  | -3.32596400 | 3.52087500  |
| H | 0.07410100  | -3.29389300 | 2.53265300  |
| H | 1.20123600  | -4.67259200 | 2.43320700  |
| H | 1.96601800  | -1.78901600 | 1.78358500  |

**<sup>2</sup>TS1**

|   |             |             |             |
|---|-------------|-------------|-------------|
| C | -0.75433100 | 6.12198700  | 3.52409800  |
| C | -1.79015500 | 5.32185600  | 3.10099800  |
| C | -1.58802500 | 4.33615600  | 2.09779000  |
| C | 0.75994100  | 5.02858100  | 1.97578500  |
| C | 0.53419300  | 5.96445500  | 2.96027700  |
| H | -3.63900400 | 3.64908500  | 2.07297400  |
| H | -0.91918700 | 6.86815900  | 4.29558900  |
| H | -2.78110300 | 5.42408500  | 3.53549700  |
| C | -2.64415200 | 3.49593300  | 1.66467700  |
| H | 1.75174200  | 4.91339200  | 1.55465100  |
| H | 1.35358800  | 6.58528400  | 3.31027100  |
| C | -1.14051800 | 2.33008800  | 0.21749800  |
| C | -2.44729000 | 2.48044600  | 0.75062800  |
| C | 1.16108900  | 3.10916600  | -0.28950200 |
| C | 1.63551800  | 4.23268400  | -1.04899200 |
| C | 1.89643900  | 1.93318200  | -0.30751400 |
| C | 0.86799400  | 5.41500900  | -1.24068900 |
| C | 2.91893700  | 4.15178700  | -1.67570200 |
| C | 3.21337000  | 1.86894200  | -0.83734100 |
| C | 1.35569000  | 6.46174700  | -1.99051300 |
| H | -0.11922200 | 5.48268600  | -0.80002500 |
| C | 3.39948600  | 5.25451100  | -2.43132500 |
| C | 3.69108000  | 2.97703200  | -1.50723400 |
| C | 2.63757800  | 6.38899800  | -2.58560300 |
| H | 0.74741300  | 7.35027600  | -2.13135100 |
| H | 4.38027200  | 5.17860600  | -2.89323600 |
| H | 4.70265000  | 2.94999300  | -1.90194700 |
| H | 3.01091100  | 7.22448400  | -3.17013900 |
| O | 1.38113800  | 0.79161500  | 0.30196200  |
| O | -0.92855900 | 1.30857700  | -0.69911400 |
| P | 0.02768500  | 0.05140400  | -0.28274300 |
| C | 4.16420200  | 0.74034700  | -0.57885300 |
| C | 5.01705300  | 0.82890900  | 0.54740700  |
| C | 5.38289200  | -1.19698300 | -1.34479500 |
| C | 6.26753900  | -1.10679800 | -0.27036000 |
| H | 5.51402500  | -2.00402700 | -2.05672600 |
| C | -3.59687000 | 1.64640200  | 0.28823400  |
| C | -4.06382800 | 1.77397000  | -1.04221100 |
| C | -4.29456400 | 0.82490500  | 1.20293000  |
| C | -5.25374400 | 1.13717400  | -1.40389500 |
| C | -5.48422000 | 0.21545400  | 0.78690300  |

|   |             |             |             |
|---|-------------|-------------|-------------|
| C | -6.00269900 | 0.38544300  | -0.49778100 |
| H | -5.61727300 | 1.25778000  | -2.41851900 |
| H | -6.03821900 | -0.39098500 | 1.49793100  |
| C | 7.43457100  | -2.07395300 | -0.14284800 |
| C | 7.46664400  | -2.79047400 | 1.21761500  |
| C | 8.76803000  | -1.35198700 | -0.41351800 |
| H | 7.30130800  | -2.84366100 | -0.91234800 |
| H | 6.54014800  | -3.34457600 | 1.38356900  |
| H | 8.29973800  | -3.50072700 | 1.25705700  |
| H | 7.59956900  | -2.08232700 | 2.04290900  |
| H | 8.76454600  | -0.87362400 | -1.39791800 |
| H | 8.94585900  | -0.57150400 | 0.33504300  |
| H | 9.60875200  | -2.05371300 | -0.37462800 |
| C | 4.77918100  | 1.87282600  | 1.63643900  |
| C | 6.06783100  | 2.40160400  | 2.28447300  |
| C | 3.82140600  | 1.30762400  | 2.70599700  |
| H | 4.27953900  | 2.73027600  | 1.17490800  |
| H | 6.78063200  | 2.74893500  | 1.53012700  |
| H | 5.83595000  | 3.23999500  | 2.94947400  |
| H | 6.56533600  | 1.63780100  | 2.89178100  |
| H | 2.87211900  | 0.99697600  | 2.26216800  |
| H | 4.27210200  | 0.43608700  | 3.19608800  |
| H | 3.60974900  | 2.05784600  | 3.47618300  |
| C | -3.80932400 | 0.58351700  | 2.63184500  |
| C | -3.45729100 | -0.89746500 | 2.86760600  |
| C | -4.83111900 | 1.08626700  | 3.66777300  |
| H | -2.88724700 | 1.15007600  | 2.78021400  |
| H | -2.58735500 | -1.17025100 | 2.26752200  |
| H | -3.20445300 | -1.06701200 | 3.92030700  |
| H | -4.28691700 | -1.56221800 | 2.60502100  |
| H | -5.06931800 | 2.14317200  | 3.50992800  |
| H | -5.76997300 | 0.52466300  | 3.61233000  |
| H | -4.43595600 | 0.97374100  | 4.68319100  |
| C | -3.35262800 | 2.61522300  | -2.09983800 |
| C | -4.25125700 | 3.75494400  | -2.61517900 |
| C | -2.84087400 | 1.73474300  | -3.25486300 |
| H | -2.48129000 | 3.08996400  | -1.64485700 |
| H | -4.59714800 | 4.38747700  | -1.79112800 |
| H | -3.69886400 | 4.38409500  | -3.32154300 |
| H | -5.13489100 | 3.37072800  | -3.13562300 |
| H | -2.16236500 | 0.96351300  | -2.88373500 |
| H | -3.66964300 | 1.24413800  | -3.77698400 |
| H | -2.29844100 | 2.34472400  | -3.98558400 |
| C | -7.38711300 | -0.14125700 | -0.84657500 |
| C | -7.51490500 | -0.65540200 | -2.28926600 |
| C | -8.44112300 | 0.94788800  | -0.56056700 |
| H | -7.59779200 | -0.97763900 | -0.16759100 |
| H | -6.72316500 | -1.36827600 | -2.53189600 |
| H | -8.48640500 | -1.14109200 | -2.43228700 |
| H | -7.46052500 | 0.16810500  | -3.00938900 |
| H | -8.39311700 | 1.28121000  | 0.48083800  |
| H | -8.26838400 | 1.82116100  | -1.19924800 |
| H | -9.45255600 | 0.57555200  | -0.75887200 |
| C | 3.58464800  | -2.64884100 | 1.56302600  |
| C | 0.79079500  | -5.01638800 | 0.21222600  |
| C | 2.06755200  | -2.39011500 | 1.69882500  |
| H | 4.08355200  | -1.80298500 | 1.09361300  |
| H | 0.47544700  | -5.22528900 | 1.23441700  |
| H | 4.02556200  | -2.80030500 | 2.55450000  |
| H | 0.14490600  | -5.56572100 | -0.46979900 |
| C | 3.82522400  | -3.86280100 | 0.69223300  |
| O | 4.57055800  | -3.93422300 | -0.25332300 |
| C | 0.60970400  | -3.53211600 | -0.10061800 |

|   |             |             |             |
|---|-------------|-------------|-------------|
| O | 0.34877900  | -3.31291700 | -1.38073200 |
| O | 3.00992300  | -4.89465800 | 1.07065600  |
| O | 1.51113800  | -2.63032800 | 0.35316200  |
| O | -0.79786200 | -3.07092800 | 0.77760700  |
| H | -0.68674500 | -1.96534000 | 0.86380800  |
| O | -4.89426300 | -3.08669100 | 0.14782700  |
| C | -6.25745900 | -3.55800400 | -0.06603400 |
| H | -6.74026200 | -2.87209300 | -0.76351900 |
| C | -6.92795500 | -3.50669900 | 1.29695400  |
| H | -6.91558900 | -2.49093900 | 1.69890500  |
| H | -7.96815000 | -3.83616700 | 1.21655300  |
| H | -6.41001700 | -4.16295000 | 2.00342600  |
| C | -4.19716500 | -2.65990400 | -0.93390900 |
| O | -4.66515800 | -2.56129200 | -2.04667600 |
| C | -6.22726600 | -4.95736300 | -0.67066900 |
| H | -5.70264800 | -4.94678000 | -1.62837000 |
| H | -5.73151500 | -5.65988800 | 0.00754800  |
| H | -7.24831400 | -5.31201900 | -0.84242900 |
| C | -2.17695500 | -3.39871500 | 0.39827300  |
| H | -2.72357800 | -3.34149000 | 1.34279500  |
| C | -0.10398700 | 3.20335100  | 0.48571600  |
| C | -0.29140300 | 4.19497100  | 1.50611800  |
| C | 4.32353500  | -0.29870300 | -1.51443100 |
| C | 3.38683200  | -0.42873600 | -2.70928800 |
| C | 3.01240200  | -1.88902000 | -3.00779700 |
| C | 3.98730600  | 0.25055700  | -3.95387600 |
| H | 2.45497600  | 0.08622300  | -2.46016300 |
| H | 2.69154800  | -2.40350600 | -2.10083300 |
| H | 2.18990400  | -1.92166700 | -3.72891400 |
| H | 3.85185200  | -2.44807700 | -3.43558700 |
| H | 4.17055900  | 1.31445300  | -3.77625700 |
| H | 4.94055500  | -0.21653300 | -4.22711800 |
| H | 3.30701700  | 0.16144700  | -4.80800200 |
| C | -2.76070900 | -2.34844400 | -0.56484900 |
| H | -2.74774200 | -1.35881500 | -0.09749700 |
| H | -2.17854700 | -2.29161000 | -1.48541300 |
| C | -2.29519200 | -4.81489100 | -0.14826500 |
| H | -3.35224900 | -5.05249000 | -0.27342900 |
| H | -1.80464400 | -4.90489300 | -1.11987100 |
| H | -1.87708100 | -5.54375700 | 0.54823000  |
| C | 2.22988000  | -5.51412500 | 0.02208500  |
| O | -0.54558700 | -0.65936300 | 0.94447400  |
| O | 0.24741000  | -0.73468600 | -1.54426600 |
| H | 0.36236700  | -2.30559700 | -1.54058500 |
| C | 6.05526000  | -0.09843700 | 0.67548900  |
| H | 6.72042700  | -0.03076800 | 1.52996400  |
| C | 2.34036400  | -7.02342300 | 0.16620100  |
| H | 1.75275400  | -7.52911800 | -0.60592700 |
| H | 3.38500700  | -7.32701900 | 0.06717400  |
| H | 1.97721200  | -7.34321400 | 1.14807900  |
| H | 2.62716900  | -5.19550200 | -0.94656300 |
| C | 1.39822900  | -3.10258400 | 2.86579000  |
| H | 1.80969300  | -2.66957000 | 3.78340900  |
| H | 0.32195200  | -2.93390900 | 2.86548100  |
| H | 1.60810700  | -4.17152000 | 2.87323400  |
| H | 1.90530800  | -1.31721200 | 1.81441600  |

**<sup>2</sup>INT2**

|   |             |            |            |
|---|-------------|------------|------------|
| C | -0.62216400 | 6.10546900 | 3.58949700 |
| C | -1.67098000 | 5.32305000 | 3.16544000 |
| C | -1.49121900 | 4.35472800 | 2.14130100 |
| C | 0.86190100  | 5.02827200 | 2.00117300 |
| C | 0.65740400  | 5.94707400 | 3.00615800 |



|   |             |             |             |
|---|-------------|-------------|-------------|
| H | -3.54919600 | 3.68801000  | 2.13286400  |
| H | -0.76989900 | 6.83816500  | 4.37708900  |
| H | -2.65490600 | 5.42584900  | 3.61520700  |
| C | -2.56182900 | 3.53213500  | 1.70862000  |
| H | 1.84729400  | 4.91201700  | 1.56577900  |
| H | 1.48701100  | 6.55328000  | 3.35742500  |
| C | -1.09003500 | 2.38637400  | 0.22064400  |
| C | -2.38835400 | 2.53324200  | 0.77224000  |
| C | 1.22142700  | 3.13711100  | -0.29511900 |
| C | 1.71713500  | 4.26080100  | -1.04050700 |
| C | 1.93786900  | 1.95187200  | -0.33303200 |
| C | 0.97482300  | 5.46195100  | -1.21043800 |
| C | 2.99506700  | 4.15798900  | -1.67628700 |
| C | 3.25046900  | 1.86039300  | -0.86446400 |
| C | 1.48110000  | 6.50706700  | -1.95009100 |
| H | -0.00737700 | 5.54592500  | -0.76128400 |
| C | 3.49448600  | 5.25969100  | -2.42120700 |
| C | 3.74499900  | 2.96574200  | -1.52669400 |
| C | 2.75675500  | 6.41256000  | -2.55536000 |
| H | 0.89264700  | 7.41110800  | -2.07491300 |
| H | 4.47016200  | 5.16850100  | -2.89080700 |
| H | 4.75335700  | 2.92253200  | -1.92778400 |
| H | 3.14476600  | 7.24689600  | -3.13178900 |
| O | 1.39329300  | 0.80595100  | 0.26150600  |
| O | -0.90455900 | 1.37142000  | -0.71931600 |
| P | 0.05427000  | 0.11611900  | -0.36506800 |
| C | 4.17240100  | 0.70851400  | -0.60625300 |
| C | 5.02375900  | 0.77706800  | 0.52228500  |
| C | 5.32149500  | -1.27729400 | -1.35079800 |
| C | 6.20402700  | -1.21072000 | -0.27305900 |
| H | 5.42277300  | -2.09735200 | -2.05225700 |
| C | -3.54825800 | 1.71805300  | 0.30041500  |
| C | -4.03606700 | 1.89989000  | -1.01615300 |
| C | -4.22875900 | 0.85837800  | 1.19172400  |
| C | -5.22808300 | 1.27285500  | -1.38631500 |
| C | -5.42242000 | 0.26149400  | 0.76858800  |
| C | -5.95868500 | 0.47832500  | -0.50144400 |
| H | -5.60903100 | 1.43471400  | -2.38896100 |
| H | -5.96510900 | -0.37277700 | 1.46330300  |
| C | 7.33054100  | -2.22270800 | -0.13232900 |
| C | 7.35172200  | -2.90310600 | 1.24641700  |
| C | 8.68876900  | -1.56449600 | -0.44017900 |
| H | 7.15313900  | -3.00667700 | -0.87777300 |
| H | 6.40225900  | -3.40571700 | 1.44255100  |
| H | 8.14950000  | -3.65250500 | 1.29030900  |
| H | 7.53501000  | -2.18180400 | 2.05043700  |
| H | 8.69224900  | -1.11487200 | -1.43811300 |
| H | 8.90797600  | -0.77084200 | 0.28327800  |
| H | 9.50046300  | -2.29898300 | -0.39082800 |
| C | 4.81559500  | 1.83200000  | 1.60683900  |
| C | 6.11982800  | 2.33567500  | 2.24380000  |
| C | 3.85307800  | 1.29167900  | 2.68500300  |
| H | 4.33233100  | 2.69892400  | 1.14539400  |
| H | 6.83328700  | 2.66683700  | 1.48285600  |
| H | 5.91074900  | 3.17982800  | 2.90918500  |
| H | 6.60654900  | 1.56281400  | 2.84807100  |
| H | 2.89720700  | 0.99078500  | 2.24810900  |
| H | 4.29013900  | 0.41595600  | 3.17915500  |
| H | 3.65669700  | 2.05134300  | 3.45007200  |
| C | -3.72855600 | 0.57465100  | 2.60744600  |
| C | -3.45804900 | -0.92444700 | 2.83304000  |
| C | -4.70609600 | 1.12162300  | 3.66428700  |
| H | -2.77436800 | 1.09021300  | 2.74243100  |

|   |             |             |             |
|---|-------------|-------------|-------------|
| H | -2.64123000 | -1.26193300 | 2.19340800  |
| H | -3.16456900 | -1.10579000 | 3.87286300  |
| H | -4.33684000 | -1.53952600 | 2.61593800  |
| H | -4.88480300 | 2.19258100  | 3.52548300  |
| H | -5.67610400 | 0.61573100  | 3.60846500  |
| H | -4.30775200 | 0.97059200  | 4.67343400  |
| C | -3.34289900 | 2.78885500  | -2.04637100 |
| C | -4.24802700 | 3.95399700  | -2.48796000 |
| C | -2.85636300 | 1.96477600  | -3.25263400 |
| H | -2.46105000 | 3.23946100  | -1.58631100 |
| H | -4.57262800 | 4.54857600  | -1.62783900 |
| H | -3.70993200 | 4.61359400  | -3.17736000 |
| H | -5.14469700 | 3.59575500  | -3.00444800 |
| H | -2.18176500 | 1.16754300  | -2.93220000 |
| H | -3.69686600 | 1.50918200  | -3.78726500 |
| H | -2.31843300 | 2.60625100  | -3.95922700 |
| C | -7.34178800 | -0.04648600 | -0.85734900 |
| C | -7.45775500 | -0.56735100 | -2.29881600 |
| C | -8.39569900 | 1.04587200  | -0.58432800 |
| H | -7.55807500 | -0.87999900 | -0.17671200 |
| H | -6.67433000 | -1.29411500 | -2.52611500 |
| H | -8.43432500 | -1.03983400 | -2.45149400 |
| H | -7.38194300 | 0.25071400  | -3.02319700 |
| H | -8.35453100 | 1.38490200  | 0.45557700  |
| H | -8.21811500 | 1.91551400  | -1.22665800 |
| H | -9.40613300 | 0.67371000  | -0.78744500 |
| C | 3.46281700  | -2.68208100 | 1.56975000  |
| C | 0.66565800  | -5.10465800 | 0.29170600  |
| C | 1.93989000  | -2.43406300 | 1.69112300  |
| H | 3.96037400  | -1.83602600 | 1.09835100  |
| H | 0.38795800  | -5.33063000 | 1.32290100  |
| H | 3.90319900  | -2.82994900 | 2.56234700  |
| H | 0.02613000  | -5.68935500 | -0.36697100 |
| C | 3.70558900  | -3.89750400 | 0.70163600  |
| O | 4.44835900  | -3.96543800 | -0.24789300 |
| C | 0.38605600  | -3.61836000 | -0.00992100 |
| O | 0.23142000  | -3.48071700 | -1.36508900 |
| O | 2.90678100  | -4.93361800 | 1.09076100  |
| O | 1.39652500  | -2.71659100 | 0.36118900  |
| O | -0.80647100 | -3.14578900 | 0.71487300  |
| H | -0.62453500 | -1.56259200 | 0.85482500  |
| O | -4.90150900 | -3.07760500 | 0.14232200  |
| C | -6.28237200 | -3.50769100 | -0.04356700 |
| H | -6.75643100 | -2.81240200 | -0.73829900 |
| C | -6.92702300 | -3.42593600 | 1.33046700  |
| H | -6.88171400 | -2.40756900 | 1.72349300  |
| H | -7.97681400 | -3.72834400 | 1.27129100  |
| H | -6.41420000 | -4.08957900 | 2.03368400  |
| C | -4.20903200 | -2.69206900 | -0.95770100 |
| O | -4.69568100 | -2.58966900 | -2.06254700 |
| C | -6.30716200 | -4.91237500 | -0.63617300 |
| H | -5.80224500 | -4.92611500 | -1.60426900 |
| H | -5.81832200 | -5.62326100 | 0.03814900  |
| H | -7.34185800 | -5.23718800 | -0.78373700 |
| C | -2.17435900 | -3.49494500 | 0.33129000  |
| H | -2.71096100 | -3.42470600 | 1.28002600  |
| C | -0.03812700 | 3.23929900  | 0.48891900  |
| C | -0.20356500 | 4.21416000  | 1.52975600  |
| C | 4.29651300  | -0.34313100 | -1.53257100 |
| C | 3.35947500  | -0.45382000 | -2.72872600 |
| C | 2.91447100  | -1.90055200 | -2.99584800 |
| C | 3.99806200  | 0.17243100  | -3.98205200 |
| H | 2.45337900  | 0.11317600  | -2.49726700 |

|   |             |             |             |
|---|-------------|-------------|-------------|
| H | 2.55569200  | -2.37573000 | -2.08170600 |
| H | 2.10177800  | -1.90911900 | -3.72880300 |
| H | 3.73047500  | -2.51065800 | -3.39808200 |
| H | 4.23491800  | 1.22899000  | -3.82147500 |
| H | 4.92779700  | -0.34639000 | -4.24205500 |
| H | 3.31824100  | 0.10256600  | -4.83831900 |
| C | -2.75461000 | -2.43055800 | -0.62168000 |
| H | -2.70542100 | -1.44099100 | -0.15588500 |
| H | -2.19338800 | -2.39380300 | -1.55556300 |
| C | -2.35590600 | -4.90734800 | -0.21606800 |
| H | -3.42361500 | -5.09086200 | -0.34689200 |
| H | -1.86383300 | -5.02433200 | -1.18341700 |
| H | -1.98259500 | -5.65641500 | 0.48402300  |
| C | 2.10859400  | -5.54959400 | 0.04913100  |
| O | -0.55173300 | -0.55786600 | 0.92745700  |
| O | 0.21111900  | -0.72741100 | -1.57623100 |
| H | 0.27617500  | -2.51592100 | -1.56833100 |
| C | 6.02696100  | -0.18603400 | 0.66195600  |
| H | 6.68916800  | -0.13671500 | 1.51988800  |
| C | 2.28124900  | -7.05734800 | 0.14544000  |
| H | 1.69041900  | -7.56361500 | -0.62413300 |
| H | 3.33324600  | -7.31843800 | 0.00844000  |
| H | 1.95887600  | -7.41945400 | 1.12713700  |
| H | 2.46156600  | -5.18830000 | -0.92115900 |
| C | 1.28599900  | -3.13129700 | 2.87994200  |
| H | 1.68760200  | -2.67579200 | 3.79113000  |
| H | 0.20514200  | -2.98886800 | 2.87445800  |
| H | 1.51503000  | -4.19619600 | 2.90415500  |
| H | 1.78236200  | -1.35849100 | 1.80669800  |

### <sup>2</sup>INT3

|   |             |             |             |
|---|-------------|-------------|-------------|
| C | -2.45960100 | 7.10836900  | -1.90316700 |
| C | -1.16853900 | 6.63564900  | -1.87261200 |
| C | -0.85937600 | 5.39081900  | -1.26104700 |
| C | -3.23338800 | 5.13902600  | -0.71675700 |
| C | -3.50188800 | 6.34104200  | -1.33279100 |
| H | 1.22254400  | 5.41191100  | -1.85123900 |
| H | -2.68417700 | 8.05808100  | -2.37920800 |
| H | -0.36226300 | 7.19967400  | -2.33389200 |
| C | 0.45262000  | 4.85500100  | -1.32534000 |
| H | -4.04503000 | 4.56018600  | -0.29432500 |
| H | -4.52554800 | 6.69931600  | -1.38667800 |
| C | -0.27540800 | 2.93232900  | -0.10931200 |
| C | 0.75531500  | 3.61216800  | -0.81413500 |
| C | -2.58710700 | 2.56640000  | 0.72703000  |
| C | -3.41325000 | 3.08393400  | 1.78322700  |
| C | -2.74050800 | 1.23143400  | 0.38567300  |
| C | -3.22684000 | 4.37601200  | 2.34636300  |
| C | -4.45002100 | 2.25364700  | 2.32134400  |
| C | -3.73060500 | 0.37251300  | 0.93432100  |
| C | -4.04829700 | 4.83783100  | 3.35028300  |
| H | -2.41963900 | 4.99896800  | 1.98049400  |
| C | -5.29146200 | 2.76818300  | 3.34443400  |
| C | -4.59599000 | 0.92192400  | 1.85603100  |
| C | -5.10151900 | 4.03423100  | 3.84695000  |
| H | -3.88202300 | 5.82597100  | 3.76870200  |
| H | -6.08061000 | 2.13110400  | 3.73476100  |
| H | -5.38509000 | 0.30457100  | 2.27370800  |
| H | -5.74648800 | 4.41334300  | 4.63390500  |
| O | -1.91770300 | 0.67514400  | -0.59919900 |
| O | 0.07038600  | 1.72255600  | 0.50574200  |
| P | -0.37294400 | 0.35791800  | -0.24452900 |
| C | -3.77716800 | -1.06772800 | 0.53642800  |

|   |             |             |             |
|---|-------------|-------------|-------------|
| C | -4.10027300 | -1.42619000 | -0.78991500 |
| C | -3.45340600 | -3.40643200 | 1.06415400  |
| C | -3.77294500 | -3.78307600 | -0.24263000 |
| H | -3.19282900 | -4.18256900 | 1.77946400  |
| C | 2.05236500  | 2.91419100  | -1.06516100 |
| C | 2.92950400  | 2.63501400  | 0.00603600  |
| C | 2.34502200  | 2.44198400  | -2.36461500 |
| C | 4.06552500  | 1.85961500  | -0.23319600 |
| C | 3.51087900  | 1.69055500  | -2.55404200 |
| C | 4.37416200  | 1.37174300  | -1.50703600 |
| H | 4.72483600  | 1.62346200  | 0.59475600  |
| H | 3.74863300  | 1.33057300  | -3.55156600 |
| C | -3.77379500 | -5.25785100 | -0.62399200 |
| C | -3.67985400 | -5.49982400 | -2.13639400 |
| C | -5.00781000 | -5.96848000 | -0.03407200 |
| H | -2.88399400 | -5.70728900 | -0.15839500 |
| H | -2.86206700 | -4.92287400 | -2.57720100 |
| H | -3.51692000 | -6.56226300 | -2.34312600 |
| H | -4.60771600 | -5.20956100 | -2.64155400 |
| H | -5.05721700 | -5.84520000 | 1.05209800  |
| H | -5.92604600 | -5.54821200 | -0.45913400 |
| H | -4.98839700 | -7.04108800 | -0.25807800 |
| C | -4.46857200 | -0.40154800 | -1.85885200 |
| C | -5.95241500 | -0.53039900 | -2.25164200 |
| C | -3.55144100 | -0.50643300 | -3.09176400 |
| H | -4.33985500 | 0.59986100  | -1.44085500 |
| H | -6.60424300 | -0.40583100 | -1.38062000 |
| H | -6.22209500 | 0.22953800  | -2.99350000 |
| H | -6.16215200 | -1.51310700 | -2.68796200 |
| H | -2.49961700 | -0.47726400 | -2.80281400 |
| H | -3.71826500 | -1.44253200 | -3.63490000 |
| H | -3.75446000 | 0.31927700  | -3.78300100 |
| C | 1.45857200  | 2.73353500  | -3.57404600 |
| C | 1.06213800  | 1.46464100  | -4.34717300 |
| C | 2.13857500  | 3.75942200  | -4.50042200 |
| H | 0.52808200  | 3.18146100  | -3.21810800 |
| H | 0.54128300  | 0.77302100  | -3.68408500 |
| H | 0.39753600  | 1.72346000  | -5.17877700 |
| H | 1.93277300  | 0.95210600  | -4.77091300 |
| H | 2.37358600  | 4.68570000  | -3.96571000 |
| H | 3.07811600  | 3.36260700  | -4.90079500 |
| H | 1.48902700  | 4.00808400  | -5.34694800 |
| C | 2.69670200  | 3.21404400  | 1.39807500  |
| C | 3.75602700  | 4.28833200  | 1.71126100  |
| C | 2.66858200  | 2.13696900  | 2.49097300  |
| H | 1.72344200  | 3.71282300  | 1.40286400  |
| H | 3.75231000  | 5.07993100  | 0.95521100  |
| H | 3.56809800  | 4.74493600  | 2.68935500  |
| H | 4.76125200  | 3.85195500  | 1.73073500  |
| H | 1.92118500  | 1.37186800  | 2.26995700  |
| H | 3.64296800  | 1.65286100  | 2.58581700  |
| H | 2.42655400  | 2.57705700  | 3.46386000  |
| C | 5.62176600  | 0.53769500  | -1.75348900 |
| C | 5.60490000  | -0.76706000 | -0.93788400 |
| C | 6.90172400  | 1.34821900  | -1.47944000 |
| H | 5.62304700  | 0.26560900  | -2.81763800 |
| H | 4.68431700  | -1.32557500 | -1.12367700 |
| H | 6.46345300  | -1.39587900 | -1.20202500 |
| H | 5.65609100  | -0.56424500 | 0.13516900  |
| H | 6.93241500  | 2.26092000  | -2.08300300 |
| H | 6.95867900  | 1.64229400  | -0.42591300 |
| H | 7.79336600  | 0.75376400  | -1.70799100 |
| C | 1.05360300  | -2.32679500 | -3.51039300 |

|   |             |             |             |
|---|-------------|-------------|-------------|
| C | 1.02264100  | -5.31082500 | -0.14872400 |
| C | 2.46336000  | -2.10779100 | -2.89931400 |
| H | 0.54848500  | -1.37182600 | -3.64643800 |
| H | 1.97674700  | -5.70163100 | -0.51119700 |
| H | 1.14942200  | -2.80494000 | -4.49320400 |
| H | 0.63068400  | -6.03859400 | 0.57447200  |
| C | 0.12043400  | -3.16224100 | -2.66170300 |
| O | -1.01708500 | -2.85801800 | -2.37319500 |
| C | 1.26702200  | -4.03761000 | 0.63446600  |
| O | 0.43235300  | -3.15652300 | 0.76714500  |
| O | 0.70992100  | -4.32195300 | -2.27663000 |
| O | 2.38886600  | -1.88838100 | -1.49359500 |
| O | 2.45899600  | -4.08064400 | 1.22513500  |
| H | 1.81558900  | -1.10752600 | -1.36561600 |
| O | 4.92625400  | -0.61852700 | 2.48437500  |
| C | 5.84639700  | -0.01318900 | 3.44698400  |
| H | 5.25960000  | 0.64495900  | 4.09432500  |
| C | 6.84847000  | 0.78731100  | 2.63128000  |
| H | 6.35210900  | 1.58563500  | 2.07388000  |
| H | 7.58765800  | 1.24366600  | 3.29642400  |
| H | 7.37288800  | 0.14293500  | 1.91952900  |
| C | 3.70653100  | -0.96966100 | 2.94629300  |
| O | 3.33287900  | -0.75776100 | 4.08281300  |
| C | 6.48296900  | -1.12086800 | 4.27786000  |
| H | 5.71612200  | -1.66460800 | 4.83388600  |
| H | 7.02182500  | -1.81941600 | 3.62973800  |
| H | 7.19187600  | -0.69539100 | 4.99483200  |
| C | 2.81146100  | -3.19188700 | 2.33349800  |
| H | 3.82738700  | -3.53364800 | 2.55445600  |
| C | -1.57374600 | 3.39623900  | 0.01559900  |
| C | -1.90548600 | 4.63754900  | -0.63265300 |
| C | -3.45032200 | -2.07281500 | 1.48088100  |
| C | -3.12260600 | -1.76134900 | 2.94072300  |
| C | -1.83243300 | -2.43936400 | 3.43074700  |
| C | -4.30770600 | -2.14195800 | 3.84926900  |
| H | -2.96286100 | -0.68453300 | 3.03420100  |
| H | -0.98794200 | -2.15312800 | 2.80481700  |
| H | -1.61518200 | -2.13401300 | 4.45996400  |
| H | -1.91026700 | -3.53174000 | 3.42192100  |
| H | -5.22849800 | -1.63555900 | 3.54385200  |
| H | -4.49712600 | -3.22037900 | 3.80571300  |
| H | -4.10072800 | -1.87581500 | 4.89179300  |
| C | 2.88871000  | -1.71234800 | 1.90785600  |
| H | 3.33645700  | -1.63675300 | 0.91576500  |
| H | 1.89274500  | -1.26975800 | 1.88613200  |
| C | 1.90627100  | -3.47167500 | 3.52666700  |
| H | 2.23233500  | -2.87342400 | 4.37865000  |
| H | 0.87403100  | -3.20454500 | 3.29843100  |
| H | 1.95126900  | -4.53238700 | 3.78959600  |
| C | 0.03611500  | -5.14638200 | -1.29723200 |
| O | 0.37508600  | -0.02388400 | -1.46496100 |
| O | -0.30946500 | -0.63539100 | 0.98260300  |
| H | -0.08328500 | -1.57460600 | 0.75818300  |
| C | -4.10404000 | -2.77681900 | -1.14634900 |
| H | -4.34696500 | -3.03548600 | -2.16954100 |
| C | -0.31638000 | -6.47470400 | -1.95189400 |
| H | -0.85525900 | -7.11836100 | -1.24934600 |
| H | -0.95459500 | -6.30787900 | -2.82106200 |
| H | 0.58864000  | -6.99542200 | -2.28045700 |
| H | -0.85786300 | -4.61919400 | -0.95650800 |
| H | 2.87216800  | -1.20955100 | -3.39018000 |
| C | 3.43318900  | -3.26061700 | -3.13307300 |
| H | 3.54140200  | -3.46245500 | -4.20375800 |

|                           |             |             |             |
|---------------------------|-------------|-------------|-------------|
| H                         | 4.41594600  | -3.00554100 | -2.72806200 |
| H                         | 3.07447500  | -4.16552200 | -2.64100500 |
| <b>S-Chain- (R, R)-DL</b> |             |             |             |
| <b><sup>3</sup>INT1</b>   |             |             |             |
| C                         | -0.28267500 | 7.34893700  | -1.92876500 |
| C                         | 0.85015800  | 6.59403100  | -1.73482000 |
| C                         | 0.78756000  | 5.33972800  | -1.06962200 |
| C                         | -1.62547600 | 5.66641300  | -0.80933000 |
| C                         | -1.53322600 | 6.86955100  | -1.47255500 |
| H                         | 2.88220200  | 4.87877600  | -1.34499700 |
| H                         | -0.22383900 | 8.30292100  | -2.44398100 |
| H                         | 1.81340300  | 6.93718000  | -2.10276500 |
| C                         | 1.93876500  | 4.52267900  | -0.94274900 |
| H                         | -2.59186700 | 5.31139600  | -0.47349700 |
| H                         | -2.43097800 | 7.45359400  | -1.65192200 |
| C                         | 0.64406600  | 2.85728200  | 0.17255500  |
| C                         | 1.88594200  | 3.26559500  | -0.37765500 |
| C                         | -1.76170300 | 3.10486900  | 0.75801800  |
| C                         | -2.50333100 | 3.87473900  | 1.71853300  |
| C                         | -2.25138000 | 1.85518400  | 0.40742700  |
| C                         | -2.00334600 | 5.07562600  | 2.29280400  |
| C                         | -3.78609000 | 3.40293100  | 2.14462700  |
| C                         | -3.53559500 | 1.38276800  | 0.78828800  |
| C                         | -2.74570400 | 5.78421900  | 3.21061500  |
| H                         | -1.01868700 | 5.42640100  | 2.00813700  |
| C                         | -4.53422500 | 4.16712800  | 3.07993400  |
| C                         | -4.28476800 | 2.18227900  | 1.62510200  |
| C                         | -4.02936500 | 5.33519100  | 3.60166300  |
| H                         | -2.33938400 | 6.69367800  | 3.64293100  |
| H                         | -5.51059900 | 3.80085100  | 3.38569300  |
| H                         | -5.28582800 | 1.86402600  | 1.89888900  |
| H                         | -4.60626200 | 5.90746400  | 4.32185600  |
| O                         | -1.49600700 | 1.02715400  | -0.43080700 |
| O                         | 0.61290900  | 1.63446500  | 0.83898000  |
| P                         | -0.12392700 | 0.36844100  | 0.14892400  |
| C                         | -4.11397900 | 0.11792300  | 0.23397800  |
| C                         | -4.61836200 | 0.11019900  | -1.08375000 |
| C                         | -4.89973800 | -2.14720600 | 0.53650900  |
| C                         | -5.44337100 | -2.16779800 | -0.75242000 |
| H                         | -4.98741200 | -3.04156600 | 1.14506600  |
| C                         | 3.07764600  | 2.36256400  | -0.40630700 |
| C                         | 3.80096200  | 2.07395000  | 0.76732400  |
| C                         | 3.50797700  | 1.83530500  | -1.64831500 |
| C                         | 4.98501600  | 1.33165000  | 0.66994000  |
| C                         | 4.69593400  | 1.10248500  | -1.68916200 |
| C                         | 5.46898500  | 0.85467400  | -0.54791600 |
| H                         | 5.52726200  | 1.11845300  | 1.58155600  |
| H                         | 5.02774100  | 0.70904700  | -2.64510100 |
| C                         | -6.22316200 | -3.39767100 | -1.20343400 |
| C                         | -6.28081000 | -3.58232200 | -2.72598100 |
| C                         | -7.64650800 | -3.36288800 | -0.61140900 |
| H                         | -5.71019200 | -4.26961400 | -0.77603000 |
| H                         | -5.28357800 | -3.55794300 | -3.17715600 |
| H                         | -6.74280700 | -4.54330400 | -2.97329700 |
| H                         | -6.88204400 | -2.80079500 | -3.20355700 |
| H                         | -7.61685200 | -3.28398100 | 0.47931000  |
| H                         | -8.20004400 | -2.49845300 | -0.99532600 |
| H                         | -8.20248300 | -4.26945800 | -0.87517700 |
| C                         | -4.48988700 | 1.31625500  | -2.01160300 |
| C                         | -5.85859500 | 1.78793000  | -2.53451000 |
| C                         | -3.51641800 | 1.02694900  | -3.16925100 |
| H                         | -4.07017900 | 2.14647200  | -1.43716700 |
| H                         | -6.54383000 | 2.00046100  | -1.70779400 |

|   |             |             |             |
|---|-------------|-------------|-------------|
| H | -5.74500600 | 2.70077300  | -3.12915900 |
| H | -6.33027300 | 1.03465400  | -3.17434400 |
| H | -2.52298500 | 0.78028400  | -2.78665600 |
| H | -3.86943600 | 0.18825900  | -3.78004000 |
| H | -3.42470200 | 1.90197000  | -3.82222100 |
| C | 2.72056400  | 2.04025100  | -2.94235500 |
| C | 2.41656400  | 0.71328200  | -3.66025500 |
| C | 3.44756100  | 3.01609000  | -3.88578500 |
| H | 1.75570900  | 2.48447700  | -2.68443800 |
| H | 1.89903300  | 0.02341500  | -2.99146500 |
| H | 1.77503700  | 0.89742700  | -4.52922800 |
| H | 3.32807800  | 0.22902200  | -4.02699200 |
| H | 3.61070100  | 3.98800800  | -3.41046800 |
| H | 4.42741600  | 2.62025300  | -4.17538300 |
| H | 2.86557100  | 3.17803200  | -4.79976100 |
| C | 3.35055100  | 2.54092600  | 2.14783700  |
| C | 4.40905000  | 3.43769400  | 2.81625000  |
| C | 2.98613600  | 1.34012200  | 3.04304300  |
| H | 2.44914600  | 3.14910300  | 2.02900000  |
| H | 4.66102100  | 4.29343700  | 2.18128400  |
| H | 4.03628000  | 3.81857500  | 3.77323200  |
| H | 5.33343900  | 2.88641100  | 3.01794300  |
| H | 2.15115700  | 0.78064900  | 2.61578900  |
| H | 3.82647500  | 0.64882800  | 3.15440600  |
| H | 2.68772900  | 1.68666600  | 4.03895000  |
| C | 6.76872600  | 0.05876400  | -0.66578700 |
| C | 7.52931500  | -0.08962500 | 0.65883600  |
| C | 7.70400200  | 0.66272600  | -1.73216400 |
| H | 6.49162800  | -0.95156000 | -1.00210200 |
| H | 6.90922600  | -0.53595100 | 1.43864000  |
| H | 8.41015400  | -0.72447800 | 0.51625000  |
| H | 7.87825500  | 0.88460200  | 1.02004100  |
| H | 7.23201900  | 0.71983700  | -2.71644900 |
| H | 8.00163100  | 1.67742400  | -1.44561900 |
| H | 8.61203600  | 0.05821500  | -1.83268800 |
| C | -2.69762700 | -4.23072400 | -1.62179100 |
| C | 0.44045700  | -4.96073400 | 0.20091800  |
| C | -1.36743300 | -3.47204100 | -1.71111200 |
| H | -3.51578300 | -3.53113600 | -1.46243100 |
| H | -0.56734700 | -4.11932000 | -2.06966000 |
| H | 0.79581900  | -5.06565000 | -0.82407100 |
| H | -2.86058700 | -4.76340600 | -2.56554600 |
| H | 1.29465100  | -5.06563700 | 0.87260500  |
| C | -2.68270000 | -5.21593500 | -0.47704900 |
| O | -3.51175000 | -5.28428000 | 0.39782800  |
| C | -0.09141000 | -3.56225900 | 0.42439800  |
| O | 0.22475000  | -2.93297800 | 1.43556600  |
| O | -1.58253900 | -6.02751300 | -0.55846600 |
| O | -1.01622100 | -3.01143700 | -0.36172800 |
| C | -1.15824700 | -6.01446100 | 1.92098300  |
| H | -1.91240700 | -6.79043200 | 2.05813600  |
| H | -0.33789900 | -6.17794200 | 2.62680600  |
| H | -1.61760900 | -5.05204700 | 2.15109900  |
| C | -1.48556000 | -2.22334100 | -2.56673900 |
| H | -1.80913600 | -2.50102800 | -3.57499600 |
| H | -2.22852200 | -1.54655400 | -2.13701300 |
| H | -0.53123900 | -1.70143100 | -2.62398000 |
| O | 1.69900400  | -2.76287700 | -1.31778100 |
| H | 1.39325300  | -1.83502600 | -1.24797600 |
| O | 5.32156200  | -3.16203600 | 0.63138800  |
| C | 6.50704900  | -3.56412100 | 1.37731900  |
| H | 6.88681500  | -2.68734100 | 1.90600100  |
| C | 7.50947900  | -4.03568200 | 0.33630100  |

|   |             |             |             |
|---|-------------|-------------|-------------|
| H | 7.74513300  | -3.22771000 | -0.36207700 |
| H | 8.43588300  | -4.35539000 | 0.82295500  |
| H | 7.10694600  | -4.87967800 | -0.23266500 |
| C | 4.53051200  | -2.20171800 | 1.16350000  |
| O | 4.79079000  | -1.61744700 | 2.19667200  |
| C | 6.10627600  | -4.63501100 | 2.38408000  |
| H | 5.37575300  | -4.23183300 | 3.08970600  |
| H | 5.66882500  | -5.49728200 | 1.87051600  |
| H | 6.98128200  | -4.97334800 | 2.94787900  |
| C | -0.50988000 | 3.61985200  | 0.13730800  |
| C | -0.47006500 | 4.87429500  | -0.56402300 |
| C | -4.23058600 | -1.03229800 | 1.04640300  |
| C | -3.66030600 | -1.08050400 | 2.46077500  |
| C | -2.91383800 | -2.39577500 | 2.74079400  |
| C | -4.76267200 | -0.85717500 | 3.51275100  |
| H | -2.92995400 | -0.27149900 | 2.55382800  |
| H | -2.20113400 | -2.60881900 | 1.94542400  |
| H | -2.36506200 | -2.32491000 | 3.68532500  |
| H | -3.59776800 | -3.24756300 | 2.81624000  |
| H | -5.25116500 | 0.11296200  | 3.38724900  |
| H | -5.53231000 | -1.63321600 | 3.43331700  |
| H | -4.34406700 | -0.89651600 | 4.52441900  |
| C | 3.28093700  | -1.95586500 | 0.34643200  |
| H | 3.27462300  | -0.89403800 | 0.07507900  |
| H | 2.44435600  | -2.09985500 | 1.03727700  |
| C | -0.59399300 | -6.06522300 | 0.50528400  |
| H | -0.09611500 | -7.02673200 | 0.35026300  |
| O | 0.62406600  | -0.28192900 | -0.95738300 |
| O | -0.48245600 | -0.46923900 | 1.42132700  |
| H | -0.22915900 | -1.45435100 | 1.40844200  |
| C | -5.26971500 | -1.03804000 | -1.55323300 |
| H | -5.65743800 | -1.03560700 | -2.56633100 |
| C | 3.06378700  | -2.83873200 | -0.89593200 |
| H | 3.22429900  | -3.88522600 | -0.60962700 |
| C | 3.98994100  | -2.49652400 | -2.06105300 |
| H | 3.86870800  | -1.44688200 | -2.33850000 |
| H | 5.03486600  | -2.67303300 | -1.79631200 |
| H | 3.73342400  | -3.11431000 | -2.92637700 |

**<sup>3</sup>TS1**

|   |             |            |             |
|---|-------------|------------|-------------|
| C | -0.25275500 | 7.23521700 | -2.04925200 |
| C | 0.88294800  | 6.48022700 | -1.87286500 |
| C | 0.83732000  | 5.24427000 | -1.17318300 |
| C | -1.56326100 | 5.58799100 | -0.84203600 |
| C | -1.48894500 | 6.77286600 | -1.53963700 |
| H | 2.91887700  | 4.76390000 | -1.50578900 |
| H | -0.20763300 | 8.17519400 | -2.59102400 |
| H | 1.83496700  | 6.80898700 | -2.28126200 |
| C | 1.98745100  | 4.42374500 | -1.06333300 |
| H | -2.51954200 | 5.24649300 | -0.46597300 |
| H | -2.39040500 | 7.35550000 | -1.70476900 |
| C | 0.72326400  | 2.78866800 | 0.14233600  |
| C | 1.94541200  | 3.18275500 | -0.46429400 |
| C | -1.66194800 | 3.07524400 | 0.79160500  |
| C | -2.37218000 | 3.87838300 | 1.74794700  |
| C | -2.17496700 | 1.82538700 | 0.47419700  |
| C | -1.83934700 | 5.08086900 | 2.28837900  |
| C | -3.65705300 | 3.44202000 | 2.20344700  |
| C | -3.47027000 | 1.39826300 | 0.87333300  |
| C | -2.55121700 | 5.82213000 | 3.20458000  |
| H | -0.85327900 | 5.40593500 | 1.97857900  |
| C | -4.37318200 | 4.23865100 | 3.13652700  |
| C | -4.19070000 | 2.22629300 | 1.70734900  |



|   |             |             |             |
|---|-------------|-------------|-------------|
| C | -3.83614100 | 5.40610200  | 3.62695100  |
| H | -2.11992200 | 6.73202000  | 3.61120400  |
| H | -5.35157900 | 3.89847900  | 3.46536600  |
| H | -5.19776800 | 1.93798200  | 1.99298500  |
| H | -4.38890400 | 6.00350500  | 4.34575600  |
| O | -1.44224600 | 0.96797400  | -0.34614300 |
| O | 0.71443100  | 1.59257900  | 0.84615800  |
| P | -0.07654900 | 0.28867600  | 0.26437700  |
| C | -4.09525100 | 0.15383600  | 0.32432500  |
| C | -4.68767300 | 0.19199700  | -0.95519400 |
| C | -4.85280900 | -2.12230900 | 0.60086300  |
| C | -5.47633200 | -2.10211100 | -0.65201000 |
| H | -4.89679800 | -3.03817500 | 1.18121500  |
| C | 3.13163400  | 2.27415500  | -0.50357900 |
| C | 3.89782800  | 2.03799200  | 0.65413300  |
| C | 3.50629600  | 1.68224300  | -1.73445700 |
| C | 5.05972000  | 1.26102700  | 0.55351600  |
| C | 4.66689600  | 0.90632400  | -1.77711200 |
| C | 5.47454000  | 0.69509900  | -0.65203500 |
| H | 5.63619200  | 1.09032000  | 1.45328200  |
| H | 4.95401300  | 0.45468100  | -2.72230800 |
| C | -6.26962400 | -3.32476000 | -1.09896300 |
| C | -6.40928900 | -3.46101900 | -2.62136000 |
| C | -7.65822600 | -3.32474600 | -0.42891900 |
| H | -5.72500200 | -4.20399000 | -0.73047700 |
| H | -5.43797100 | -3.41251600 | -3.12440400 |
| H | -6.87599300 | -4.41834200 | -2.87433500 |
| H | -7.04183200 | -2.67075100 | -3.04066700 |
| H | -7.56861400 | -3.28041100 | 0.66049700  |
| H | -8.24044100 | -2.45462100 | -0.75312100 |
| H | -8.21972300 | -4.22858500 | -0.69074600 |
| C | -4.60607700 | 1.42970500  | -1.84622300 |
| C | -5.98456900 | 1.86563700  | -2.37264800 |
| C | -3.61031000 | 1.21212300  | -3.00133600 |
| H | -4.22366800 | 2.25697000  | -1.24171100 |
| H | -6.69278200 | 2.01182700  | -1.55098100 |
| H | -5.89897900 | 2.80841900  | -2.92361400 |
| H | -6.41343500 | 1.12533800  | -3.05629800 |
| H | -2.61021300 | 0.99778500  | -2.61639400 |
| H | -3.92393900 | 0.37266100  | -3.63264100 |
| H | -3.55104800 | 2.10539700  | -3.63323500 |
| C | 2.70539100  | 1.89372200  | -3.01955800 |
| C | 2.32872500  | 0.57683400  | -3.71884900 |
| C | 3.46382700  | 2.82466500  | -3.98433000 |
| H | 1.76556600  | 2.38385700  | -2.75477100 |
| H | 1.75310400  | -0.05893800 | -3.04408800 |
| H | 1.71379200  | 0.78602400  | -4.60119900 |
| H | 3.21155200  | 0.02659000  | -4.06328700 |
| H | 3.68691100  | 3.78915000  | -3.51849600 |
| H | 4.41616500  | 2.37676700  | -4.28982700 |
| H | 2.87293500  | 3.01168400  | -4.88773000 |
| C | 3.51675000  | 2.60994800  | 2.01602100  |
| C | 4.62661600  | 3.51882500  | 2.57605500  |
| C | 3.15343000  | 1.49039900  | 3.01012200  |
| H | 2.62913000  | 3.23572900  | 1.88676800  |
| H | 4.87591700  | 4.31984300  | 1.87234000  |
| H | 4.30406500  | 3.97721800  | 3.51708800  |
| H | 5.54298700  | 2.95515300  | 2.78092800  |
| H | 2.29314600  | 0.92141400  | 2.65100600  |
| H | 3.98226300  | 0.79128000  | 3.15213100  |
| H | 2.89313600  | 1.92051000  | 3.98385000  |
| C | 6.74250400  | -0.14913800 | -0.77754600 |
| C | 7.52752800  | -0.29292900 | 0.53307000  |

|   |             |             |             |
|---|-------------|-------------|-------------|
| C | 7.67350700  | 0.39705500  | -1.87846100 |
| H | 6.42274800  | -1.15710200 | -1.08403500 |
| H | 6.90662200  | -0.67913800 | 1.34383300  |
| H | 8.37295100  | -0.97450700 | 0.39233500  |
| H | 7.93247700  | 0.67393200  | 0.85270400  |
| H | 7.17881900  | 0.45174900  | -2.85172100 |
| H | 8.01325400  | 1.40607000  | -1.62055300 |
| H | 8.55705600  | -0.24145600 | -1.98731600 |
| C | -2.73258500 | -4.05447300 | -1.73644400 |
| C | 0.53524100  | -4.92110000 | -0.06126100 |
| C | -1.40385700 | -3.29170200 | -1.81948800 |
| H | -3.54629400 | -3.36646900 | -1.51307600 |
| H | -0.63033100 | -3.91446800 | -2.27216100 |
| H | 0.85210600  | -5.09403900 | -1.09074900 |
| H | -2.93076900 | -4.53404000 | -2.70182500 |
| H | 1.39060600  | -5.09342900 | 0.59549100  |
| C | -2.68421300 | -5.10048300 | -0.64734000 |
| O | -3.51607800 | -5.25808100 | 0.21225500  |
| C | 0.13135500  | -3.46150000 | 0.11844700  |
| O | 0.29070400  | -3.03364100 | 1.34901600  |
| O | -1.55494400 | -5.86501700 | -0.77201200 |
| O | -1.00605900 | -2.98951400 | -0.43956900 |
| C | -1.11031200 | -5.84497000 | 1.70600100  |
| H | -1.88602700 | -6.59486400 | 1.86456200  |
| H | -0.28656700 | -6.02000800 | 2.40491600  |
| H | -1.53135300 | -4.86433000 | 1.92098600  |
| C | -1.56057400 | -1.97359200 | -2.55794800 |
| H | -1.97335300 | -2.15921500 | -3.55486700 |
| H | -2.25061700 | -1.32592600 | -2.01162000 |
| H | -0.60823100 | -1.45345800 | -2.65359500 |
| O | 1.31314900  | -2.64337000 | -0.88047800 |
| H | 1.01243400  | -1.60078500 | -0.90858500 |
| O | 5.06298300  | -3.11768300 | 0.75854600  |
| C | 6.24867500  | -3.61582300 | 1.44871600  |
| H | 6.72533800  | -2.77061300 | 1.94919500  |
| C | 7.15357100  | -4.17506300 | 0.36322100  |
| H | 7.42181800  | -3.39385500 | -0.35334600 |
| H | 8.07278300  | -4.56908100 | 0.80677600  |
| H | 6.65416400  | -4.98614400 | -0.17622700 |
| C | 4.37700200  | -2.09819000 | 1.32715900  |
| O | 4.73860600  | -1.52610200 | 2.33366800  |
| C | 5.80911600  | -4.64393000 | 2.48305100  |
| H | 5.14931300  | -4.17903700 | 3.21963100  |
| H | 5.27863400  | -5.47057100 | 1.99929500  |
| H | 6.67964300  | -5.05013700 | 3.00728400  |
| C | -0.42464600 | 3.56202300  | 0.12340300  |
| C | -0.40333100 | 4.79700400  | -0.61324600 |
| C | -4.15495800 | -1.02185100 | 1.10352300  |
| C | -3.48852500 | -1.10107900 | 2.47296500  |
| C | -2.79753900 | -2.45342800 | 2.70502300  |
| C | -4.49691600 | -0.81106900 | 3.60007300  |
| H | -2.70577600 | -0.33785100 | 2.50515800  |
| H | -2.18251500 | -2.71502200 | 1.84513600  |
| H | -2.15331900 | -2.40100500 | 3.58831000  |
| H | -3.51850400 | -3.26223100 | 2.86621100  |
| H | -4.92993600 | 0.18847200  | 3.50724500  |
| H | -5.31730600 | -1.53758800 | 3.57822200  |
| H | -4.00949000 | -0.87818000 | 4.57902900  |
| C | 3.10418100  | -1.76543000 | 0.57493400  |
| H | 3.20264800  | -0.74801600 | 0.18405100  |
| H | 2.31578000  | -1.73189200 | 1.32871700  |
| C | -0.56482400 | -5.94375900 | 0.28669800  |
| H | -0.12102600 | -6.93456200 | 0.14624700  |

|   |             |             |             |
|---|-------------|-------------|-------------|
| O | 0.65691400  | -0.28809700 | -0.93735700 |
| O | -0.33247300 | -0.60627800 | 1.44982300  |
| H | -0.03211300 | -2.04804100 | 1.43278900  |
| C | -5.36233800 | -0.94376500 | -1.42230600 |
| H | -5.81259800 | -0.91091300 | -2.40852400 |
| C | 2.72882800  | -2.75159700 | -0.54226100 |
| H | 2.87225400  | -3.77105500 | -0.18128800 |
| C | 3.51187200  | -2.55647100 | -1.83275600 |
| H | 3.37408900  | -1.54127300 | -2.20719500 |
| H | 4.57498700  | -2.71851000 | -1.64573000 |
| H | 3.17060500  | -3.26444700 | -2.59290500 |

**<sup>3</sup>INT2**

|   |             |             |             |
|---|-------------|-------------|-------------|
| C | -0.62216400 | 6.10546900  | 3.58949700  |
| C | -1.67098000 | 5.32305000  | 3.16544000  |
| C | -1.49121900 | 4.35472800  | 2.14130100  |
| C | 0.86190100  | 5.02827200  | 2.00117300  |
| C | 0.65740400  | 5.94707400  | 3.00615800  |
| H | -3.54919600 | 3.68801000  | 2.13286400  |
| H | -0.76989900 | 6.83816500  | 4.37708900  |
| H | -2.65490600 | 5.42584900  | 3.61520700  |
| C | -2.56182900 | 3.53213500  | 1.70862000  |
| H | 1.84729400  | 4.91201700  | 1.56577900  |
| H | 1.48701100  | 6.55328000  | 3.35742500  |
| C | -1.09003500 | 2.38637400  | 0.22064400  |
| C | -2.38835400 | 2.53324200  | 0.77224000  |
| C | 1.22142700  | 3.13711100  | -0.29511900 |
| C | 1.71713500  | 4.26080100  | -1.04050700 |
| C | 1.93786900  | 1.95187200  | -0.33303200 |
| C | 0.97482300  | 5.46195100  | -1.21043800 |
| C | 2.99506700  | 4.15798900  | -1.67628700 |
| C | 3.25046900  | 1.86039300  | -0.86446400 |
| C | 1.48110000  | 6.50706700  | -1.95009100 |
| H | -0.00737700 | 5.54592500  | -0.76128400 |
| C | 3.49448600  | 5.25969100  | -2.42120700 |
| C | 3.74499900  | 2.96574200  | -1.52669400 |
| C | 2.75675500  | 6.41256000  | -2.55536000 |
| H | 0.89264700  | 7.41110800  | -2.07491300 |
| H | 4.47016200  | 5.16850100  | -2.89080700 |
| H | 4.75335700  | 2.92253200  | -1.92778400 |
| H | 3.14476600  | 7.24689600  | -3.13178900 |
| O | 1.39329300  | 0.80595100  | 0.26150600  |
| O | -0.90455900 | 1.37142000  | -0.71931600 |
| P | 0.05427000  | 0.11611900  | -0.36506800 |
| C | 4.17240100  | 0.70851400  | -0.60625300 |
| C | 5.02375900  | 0.77706800  | 0.52228500  |
| C | 5.32149500  | -1.27729400 | -1.35079800 |
| C | 6.20402700  | -1.21072000 | -0.27305900 |
| H | 5.42277300  | -2.09735200 | -2.05225700 |
| C | -3.54825800 | 1.71805300  | 0.30041500  |
| C | -4.03606700 | 1.89989000  | -1.01615300 |
| C | -4.22875900 | 0.85837800  | 1.19172400  |
| C | -5.22808300 | 1.27285500  | -1.38631500 |
| C | -5.42242000 | 0.26149400  | 0.76858800  |
| C | -5.95868500 | 0.47832500  | -0.50144400 |
| H | -5.60903100 | 1.43471400  | -2.38896100 |
| H | -5.96510900 | -0.37277700 | 1.46330300  |
| C | 7.33054100  | -2.22270800 | -0.13232900 |
| C | 7.35172200  | -2.90310600 | 1.24641700  |
| C | 8.68876900  | -1.56449600 | -0.44017900 |
| H | 7.15313900  | -3.00667700 | -0.87777300 |
| H | 6.40225900  | -3.40571700 | 1.44255100  |
| H | 8.14950000  | -3.65250500 | 1.29030900  |

|   |             |             |             |
|---|-------------|-------------|-------------|
| H | 7.53501000  | -2.18180400 | 2.05043700  |
| H | 8.69224900  | -1.11487200 | -1.43811300 |
| H | 8.90797600  | -0.77084200 | 0.28327800  |
| H | 9.50046300  | -2.29898300 | -0.39082800 |
| C | 4.81559500  | 1.83200000  | 1.60683900  |
| C | 6.11982800  | 2.33567500  | 2.24380000  |
| C | 3.85307800  | 1.29167900  | 2.68500300  |
| H | 4.33233100  | 2.69892400  | 1.14539400  |
| H | 6.83328700  | 2.66683700  | 1.48285600  |
| H | 5.91074900  | 3.17982800  | 2.90918500  |
| H | 6.60654900  | 1.56281400  | 2.84807100  |
| H | 2.89720700  | 0.99078500  | 2.24810900  |
| H | 4.29013900  | 0.41595600  | 3.17915500  |
| H | 3.65669700  | 2.05134300  | 3.45007200  |
| C | -3.72855600 | 0.57465100  | 2.60744600  |
| C | -3.45804900 | -0.92444700 | 2.83304000  |
| C | -4.70609600 | 1.12162300  | 3.66428700  |
| H | -2.77436800 | 1.09021300  | 2.74243100  |
| H | -2.64123000 | -1.26193300 | 2.19340800  |
| H | -3.16456900 | -1.10579000 | 3.87286300  |
| H | -4.33684000 | -1.53952600 | 2.61593800  |
| H | -4.88480300 | 2.19258100  | 3.52548300  |
| H | -5.67610400 | 0.61573100  | 3.60846500  |
| H | -4.30775200 | 0.97059200  | 4.67343400  |
| C | -3.34289900 | 2.78885500  | -2.04637100 |
| C | -4.24802700 | 3.95399700  | -2.48796000 |
| C | -2.85636300 | 1.96477600  | -3.25263400 |
| H | -2.46105000 | 3.23946100  | -1.58631100 |
| H | -4.57262800 | 4.54857600  | -1.62783900 |
| H | -3.70993200 | 4.61359400  | -3.17736000 |
| H | -5.14469700 | 3.59575500  | -3.00444800 |
| H | -2.18176500 | 1.16754300  | -2.93220000 |
| H | -3.69686600 | 1.50918200  | -3.78726500 |
| H | -2.31843300 | 2.60625100  | -3.95922700 |
| C | -7.34178800 | -0.04648600 | -0.85734900 |
| C | -7.45775500 | -0.56735100 | -2.29881600 |
| C | -8.39569900 | 1.04587200  | -0.58432800 |
| H | -7.55807500 | -0.87999900 | -0.17671200 |
| H | -6.67433000 | -1.29411500 | -2.52611500 |
| H | -8.43432500 | -1.03983400 | -2.45149400 |
| H | -7.38194300 | 0.25071400  | -3.02319700 |
| H | -8.35453100 | 1.38490200  | 0.45557700  |
| H | -8.21811500 | 1.91551400  | -1.22665800 |
| H | -9.40613300 | 0.67371000  | -0.78744500 |
| C | 3.46281700  | -2.68208100 | 1.56975000  |
| C | 0.66565800  | -5.10465800 | 0.29170600  |
| C | 1.93989000  | -2.43406300 | 1.69112300  |
| H | 3.96037400  | -1.83602600 | 1.09835100  |
| H | 0.38795800  | -5.33063000 | 1.32290100  |
| H | 3.90319900  | -2.82994900 | 2.56234700  |
| H | 0.02613000  | -5.68935500 | -0.36697100 |
| C | 3.70558900  | -3.89750400 | 0.70163600  |
| O | 4.44835900  | -3.96543800 | -0.24789300 |
| C | 0.38605600  | -3.61836000 | -0.00992100 |
| O | 0.23142000  | -3.48071700 | -1.36508900 |
| O | 2.90678100  | -4.93361800 | 1.09076100  |
| O | 1.39652500  | -2.71659100 | 0.36118900  |
| O | -0.80647100 | -3.14578900 | 0.71487300  |
| H | -0.62453500 | -1.56259200 | 0.85482500  |
| O | -4.90150900 | -3.07760500 | 0.14232200  |
| C | -6.28237200 | -3.50769100 | -0.04356700 |
| H | -6.75643100 | -2.81240200 | -0.73829900 |
| C | -6.92702300 | -3.42593600 | 1.33046700  |

|   |             |             |             |
|---|-------------|-------------|-------------|
| H | -6.88171400 | -2.40756900 | 1.72349300  |
| H | -7.97681400 | -3.72834400 | 1.27129100  |
| H | -6.41420000 | -4.08957900 | 2.03368400  |
| C | -4.20903200 | -2.69206900 | -0.95770100 |
| O | -4.69568100 | -2.58966900 | -2.06254700 |
| C | -6.30716200 | -4.91237500 | -0.63617300 |
| H | -5.80224500 | -4.92611500 | -1.60426900 |
| H | -5.81832200 | -5.62326100 | 0.03814900  |
| H | -7.34185800 | -5.23718800 | -0.78373700 |
| C | -2.17435900 | -3.49494500 | 0.33129000  |
| H | -2.71096100 | -3.42470600 | 1.28002600  |
| C | -0.03812700 | 3.23929900  | 0.48891900  |
| C | -0.20356500 | 4.21416000  | 1.52975600  |
| C | 4.29651300  | -0.34313100 | -1.53257100 |
| C | 3.35947500  | -0.45382000 | -2.72872600 |
| C | 2.91447100  | -1.90055200 | -2.99584800 |
| C | 3.99806200  | 0.17243100  | -3.98205200 |
| H | 2.45337900  | 0.11317600  | -2.49726700 |
| H | 2.55569200  | -2.37573000 | -2.08170600 |
| H | 2.10177800  | -1.90911900 | -3.72880300 |
| H | 3.73047500  | -2.51065800 | -3.39808200 |
| H | 4.23491800  | 1.22899000  | -3.82147500 |
| H | 4.92779700  | -0.34639000 | -4.24205500 |
| H | 3.31824100  | 0.10256600  | -4.83831900 |
| C | -2.75461000 | -2.43055800 | -0.62168000 |
| H | -2.70542100 | -1.44099100 | -0.15588500 |
| H | -2.19338800 | -2.39380300 | -1.55556300 |
| C | -2.35590600 | -4.90734800 | -0.21606800 |
| H | -3.42361500 | -5.09086200 | -0.34689200 |
| H | -1.86383300 | -5.02433200 | -1.18341700 |
| H | -1.98259500 | -5.65641500 | 0.48402300  |
| C | 2.10859400  | -5.54959400 | 0.04913100  |
| O | -0.55173300 | -0.55786600 | 0.92745700  |
| O | 0.21111900  | -0.72741100 | -1.57623100 |
| H | 0.27617500  | -2.51592100 | -1.56833100 |
| C | 6.02696100  | -0.18603400 | 0.66195600  |
| H | 6.68916800  | -0.13671500 | 1.51988800  |
| C | 2.28124900  | -7.05734800 | 0.14544000  |
| H | 1.69041900  | -7.56361500 | -0.62413300 |
| H | 3.33324600  | -7.31843800 | 0.00844000  |
| H | 1.95887600  | -7.41945400 | 1.12713700  |
| H | 2.46156600  | -5.18830000 | -0.92115900 |
| C | 1.28599900  | -3.13129700 | 2.87994200  |
| H | 1.68760200  | -2.67579200 | 3.79113000  |
| H | 0.20514200  | -2.98886800 | 2.87445800  |
| H | 1.51503000  | -4.19619600 | 2.90415500  |
| H | 1.78236200  | -1.35849100 | 1.80669800  |

### <sup>3</sup>INT3

|   |             |            |             |
|---|-------------|------------|-------------|
| C | 1.81287700  | 7.05992100 | -2.12907400 |
| C | 2.67497600  | 6.04366600 | -1.78992200 |
| C | 2.20287300  | 4.87163500 | -1.13932900 |
| C | -0.05337800 | 5.82484200 | -1.19305700 |
| C | 0.43325000  | 6.93931500 | -1.83855900 |
| H | 4.12513400  | 3.88229000 | -1.11676700 |
| H | 2.18399600  | 7.94742000 | -2.63265600 |
| H | 3.73260300  | 6.11231000 | -2.02988100 |
| C | 3.07565300  | 3.79126900 | -0.85552400 |
| H | -1.11293600 | 5.74261000 | -0.98348200 |
| H | -0.24953800 | 7.73076900 | -2.13273000 |
| C | 1.25339600  | 2.55270900 | 0.05875800  |
| C | 2.62272700  | 2.60895700 | -0.30894000 |
| C | -1.04510800 | 3.44494900 | 0.37469100  |

|   |             |             |             |
|---|-------------|-------------|-------------|
| C | -1.64164400 | 4.39948100  | 1.26900600  |
| C | -1.78712900 | 2.32777000  | 0.02202100  |
| C | -0.92464100 | 5.49241800  | 1.82992400  |
| C | -3.01447800 | 4.23130000  | 1.64294900  |
| C | -3.11964000 | 2.09407900  | 0.45751600  |
| C | -1.54436600 | 6.39349800  | 2.66638600  |
| H | 0.12648000  | 5.61055100  | 1.59806300  |
| C | -3.62876500 | 5.18932300  | 2.49411700  |
| C | -3.72020900 | 3.08183900  | 1.20902900  |
| C | -2.91416400 | 6.25331100  | 2.99196700  |
| H | -0.97360200 | 7.21684700  | 3.08530100  |
| H | -4.67379300 | 5.05214300  | 2.75880300  |
| H | -4.74902600 | 2.94749500  | 1.52811200  |
| H | -3.39158600 | 6.97562100  | 3.64716300  |
| O | -1.22588500 | 1.38651400  | -0.84539000 |
| O | 0.80533800  | 1.36869600  | 0.66376700  |
| P | -0.05091700 | 0.39895000  | -0.30589400 |
| C | -3.81412300 | 0.79668500  | 0.18290800  |
| C | -4.28302600 | 0.49122700  | -1.11267800 |
| C | -4.69598300 | -1.31135500 | 0.97849900  |
| C | -5.17551500 | -1.63188600 | -0.29218400 |
| H | -4.87799600 | -2.00524300 | 1.79509600  |
| C | 3.52550500  | 1.42979400  | -0.13235200 |
| C | 3.91070500  | 1.01883300  | 1.16063500  |
| C | 4.01306200  | 0.74387500  | -1.27105800 |
| C | 4.81945900  | -0.03752900 | 1.29590100  |
| C | 4.91918600  | -0.30125400 | -1.07882000 |
| C | 5.35244800  | -0.69833600 | 0.18923800  |
| H | 5.12382200  | -0.33372100 | 2.29406100  |
| H | 5.31693500  | -0.81892700 | -1.94855100 |
| C | -5.99823200 | -2.89359700 | -0.51604900 |
| C | -5.42874900 | -3.79914400 | -1.62100300 |
| C | -7.46704200 | -2.53191200 | -0.80914500 |
| H | -5.97890900 | -3.46627000 | 0.42125000  |
| H | -4.42879400 | -4.15622100 | -1.36453700 |
| H | -6.06969500 | -4.67495300 | -1.76920600 |
| H | -5.37085600 | -3.26911000 | -2.57819800 |
| H | -7.88572300 | -1.91166600 | -0.01092300 |
| H | -7.54855300 | -1.96909900 | -1.74551900 |
| H | -8.08083800 | -3.43441600 | -0.90377200 |
| C | -4.14376100 | 1.47512600  | -2.26961800 |
| C | -5.52508200 | 1.95430100  | -2.75365000 |
| C | -3.31342800 | 0.89082800  | -3.42237100 |
| H | -3.61083300 | 2.35713000  | -1.90313900 |
| H | -6.09899400 | 2.39619700  | -1.93282600 |
| H | -5.41576000 | 2.70815500  | -3.54087500 |
| H | -6.11369000 | 1.12666300  | -3.16414000 |
| H | -2.31571000 | 0.62429700  | -3.07361500 |
| H | -3.78341600 | -0.00748500 | -3.83845600 |
| H | -3.21416400 | 1.62057300  | -4.23338400 |
| C | 3.61327800  | 1.12414700  | -2.69634300 |
| C | 3.14474500  | -0.08096500 | -3.52885700 |
| C | 4.76793100  | 1.85442600  | -3.40892300 |
| H | 2.76561200  | 1.81158500  | -2.63770900 |
| H | 2.32138800  | -0.58842800 | -3.02867700 |
| H | 2.79044000  | 0.25467300  | -4.50927700 |
| H | 3.95116600  | -0.79904700 | -3.71044400 |
| H | 5.08180300  | 2.74911000  | -2.86272700 |
| H | 5.64213100  | 1.19994200  | -3.49974700 |
| H | 4.46885200  | 2.15895700  | -4.41786600 |
| C | 3.40343200  | 1.71732100  | 2.41927400  |
| C | 4.55398000  | 2.39844100  | 3.18315500  |
| C | 2.62042800  | 0.75585100  | 3.33114000  |

|   |             |             |             |
|---|-------------|-------------|-------------|
| H | 2.71313200  | 2.50936000  | 2.11860000  |
| H | 5.08276900  | 3.11203100  | 2.54316500  |
| H | 4.17022600  | 2.93894300  | 4.05551700  |
| H | 5.28513500  | 1.66515000  | 3.54028900  |
| H | 1.81384000  | 0.26640500  | 2.77952900  |
| H | 3.27557400  | -0.01716900 | 3.74448800  |
| H | 2.18070200  | 1.30234700  | 4.17281300  |
| C | 6.44110500  | -1.75814400 | 0.30304600  |
| C | 6.46521400  | -2.50299900 | 1.64386400  |
| C | 7.81722800  | -1.12254000 | 0.01620000  |
| H | 6.25397500  | -2.49929100 | -0.48678600 |
| H | 5.48873900  | -2.92903700 | 1.88537400  |
| H | 7.19639300  | -3.31710500 | 1.61100400  |
| H | 6.75670000  | -1.83870300 | 2.46485400  |
| H | 7.83069800  | -0.63297300 | -0.96215600 |
| H | 8.04991500  | -0.36410500 | 0.77209400  |
| H | 8.61042600  | -1.87837300 | 0.03497100  |
| C | 2.79277500  | -3.59478600 | -2.35692600 |
| C | -1.88755200 | -3.62586700 | -2.90027500 |
| C | 2.34225500  | -3.73240200 | -0.89925500 |
| H | 3.51454000  | -2.77587900 | -2.44026500 |
| H | 1.48986900  | -4.42906900 | -0.87738500 |
| H | -1.89522500 | -4.71676500 | -2.93284600 |
| H | 3.30834100  | -4.50330600 | -2.68990600 |
| H | -2.80696100 | -3.26103200 | -3.36971400 |
| C | 1.69862000  | -3.34003600 | -3.37897800 |
| O | 1.89402700  | -3.19005000 | -4.56504000 |
| C | -1.90898100 | -3.19174700 | -1.44991400 |
| O | -1.84171000 | -2.02662300 | -1.08877900 |
| O | 0.46751300  | -3.32243300 | -2.81171500 |
| O | 1.97096300  | -2.48152400 | -0.33387800 |
| C | -0.75890500 | -1.59917300 | -4.03668100 |
| H | 0.11014300  | -1.32422700 | -4.63644800 |
| H | -1.66406000 | -1.41018600 | -4.62163500 |
| H | -0.77329300 | -0.98971900 | -3.13585300 |
| C | 3.44759400  | -4.29126700 | -0.01269300 |
| H | 3.74615500  | -5.29444600 | -0.33433100 |
| H | 4.31812600  | -3.63188600 | -0.04432000 |
| H | 3.08827900  | -4.33919500 | 1.01762300  |
| O | -2.02263200 | -4.23082100 | -0.61983900 |
| H | 1.47518200  | -1.93185600 | -0.96623700 |
| O | 1.22139000  | -3.76265100 | 2.76500700  |
| C | 1.78130200  | -3.24000700 | 4.00719700  |
| H | 1.22041100  | -2.33329300 | 4.25776700  |
| C | 3.22534100  | -2.90357200 | 3.67087000  |
| H | 3.26845600  | -2.24692300 | 2.79889100  |
| H | 3.70498600  | -2.40439900 | 4.51834300  |
| H | 3.78758500  | -3.81591000 | 3.44726000  |
| C | -0.10950300 | -3.69852800 | 2.59561000  |
| O | -0.90168600 | -3.38975200 | 3.46482900  |
| C | 1.62977400  | -4.26898900 | 5.12011400  |
| H | 0.57390900  | -4.46886000 | 5.31151000  |
| H | 2.12859000  | -5.20293400 | 4.84132600  |
| H | 2.08833000  | -3.89479400 | 6.04108900  |
| C | 0.35355100  | 3.59165700  | -0.11800800 |
| C | 0.81408100  | 4.76819200  | -0.80210200 |
| C | -4.01878000 | -0.11463100 | 1.24587700  |
| C | -3.59633000 | 0.18481200  | 2.68416200  |
| C | -2.80472200 | -0.95850100 | 3.33421900  |
| C | -4.83059200 | 0.54149100  | 3.53625500  |
| H | -2.93850500 | 1.05721900  | 2.67194200  |
| H | -1.89129100 | -1.17411500 | 2.78279300  |
| H | -2.51608100 | -0.68441400 | 4.35447300  |

|   |             |             |             |
|---|-------------|-------------|-------------|
| H | -3.38228600 | -1.88516700 | 3.40408300  |
| H | -5.38719100 | 1.38285200  | 3.11228300  |
| H | -5.51711900 | -0.31009000 | 3.59986200  |
| H | -4.53061000 | 0.80947500  | 4.55509000  |
| C | -0.44912700 | -4.02720400 | 1.16175100  |
| H | -0.03727900 | -5.01284800 | 0.91865700  |
| H | 0.10614400  | -3.30480300 | 0.55307000  |
| C | -0.67738500 | -3.07393000 | -3.67534200 |
| H | -0.54437300 | -3.67149500 | -4.58295800 |
| O | 0.65684300  | -0.22199000 | -1.44872200 |
| O | -0.69573500 | -0.56908000 | 0.77087000  |
| H | -1.24545300 | -1.22928500 | 0.26979000  |
| C | -4.94983000 | -0.71837900 | -1.32501500 |
| H | -5.32636800 | -0.93927900 | -2.32002400 |
| C | -2.76932800 | -5.07022200 | 1.49029300  |
| H | -3.81233700 | -4.99922000 | 1.16943000  |
| H | -2.39096600 | -6.06478600 | 1.23464700  |
| H | -2.71897100 | -4.93381100 | 2.57249000  |
| C | -1.93660600 | -3.99031500 | 0.82688500  |
| H | -2.36438800 | -3.00876400 | 1.04163500  |

**S-Chain- (S, S)-DL  
4INT1**

|   |             |             |             |
|---|-------------|-------------|-------------|
| C | 2.24473500  | 6.26134900  | -3.05188900 |
| C | 3.06003600  | 5.17816600  | -2.82177900 |
| C | 2.64827700  | 4.12518400  | -1.96105600 |
| C | 0.55315700  | 5.33426500  | -1.57990500 |
| C | 0.97404900  | 6.32963400  | -2.43299000 |
| H | 4.43071400  | 2.93591300  | -2.24516200 |
| H | 2.56607300  | 7.05732400  | -3.71679000 |
| H | 4.02922900  | 5.10165600  | -3.30726100 |
| C | 3.45829400  | 2.97928500  | -1.76493800 |
| H | -0.42473700 | 5.39909500  | -1.11884400 |
| H | 0.32182200  | 7.17369700  | -2.63632900 |
| C | 1.79917200  | 2.03014400  | -0.33494600 |
| C | 3.04593400  | 1.90623500  | -1.00260600 |
| C | -0.25879300 | 3.23119500  | 0.38951200  |
| C | -0.51231800 | 4.32612900  | 1.28361800  |
| C | -1.22386000 | 2.24325900  | 0.27031100  |
| C | 0.47611300  | 5.29177200  | 1.61903800  |
| C | -1.80539600 | 4.44136900  | 1.88589100  |
| C | -2.52571200 | 2.35411400  | 0.82681400  |
| C | 0.18917600  | 6.32752100  | 2.47937400  |
| H | 1.46944200  | 5.19924200  | 1.19659200  |
| C | -2.07438200 | 5.53188400  | 2.75601100  |
| C | -2.79248100 | 3.46680100  | 1.59748300  |
| C | -1.10078100 | 6.45865700  | 3.04669000  |
| H | 0.96190000  | 7.04838700  | 2.72899400  |
| H | -3.06396100 | 5.61113900  | 3.19800200  |
| H | -3.79376600 | 3.59993700  | 1.99511300  |
| H | -1.31419500 | 7.28427000  | 3.71880700  |
| O | -0.94857200 | 1.11419100  | -0.51047400 |
| O | 1.39691500  | 0.98143000  | 0.50023200  |
| P | 0.17271900  | 0.04535900  | -0.00146600 |
| C | -3.62762000 | 1.38971500  | 0.51033000  |
| C | -4.34469300 | 1.54625100  | -0.69419800 |
| C | -5.14478300 | -0.36949900 | 1.17038300  |
| C | -5.90147400 | -0.20606000 | 0.00607900  |
| H | -5.45565500 | -1.12842300 | 1.88156700  |
| C | 3.92468100  | 0.70151200  | -0.86958800 |
| C | 4.71984700  | 0.54384600  | 0.28294000  |
| C | 4.01711400  | -0.22779900 | -1.93207700 |
| C | 5.62622700  | -0.52107200 | 0.34213500  |



|   |             |             |             |
|---|-------------|-------------|-------------|
| C | 4.95470300  | -1.25890700 | -1.83292900 |
| C | 5.77135000  | -1.42487000 | -0.70988400 |
| H | 6.22236100  | -0.64760200 | 1.23917700  |
| H | 5.03499200  | -1.97903400 | -2.64221600 |
| C | -7.17491400 | -1.02205200 | -0.17027200 |
| C | -7.57844900 | -1.26026600 | -1.63093200 |
| C | -8.32934000 | -0.35654000 | 0.60604300  |
| H | -6.98117900 | -2.00352100 | 0.27608900  |
| H | -6.76833700 | -1.72464600 | -2.19982000 |
| H | -8.44480400 | -1.92773600 | -1.67651000 |
| H | -7.86076700 | -0.32851200 | -2.13379300 |
| H | -8.07210600 | -0.22665400 | 1.66176700  |
| H | -8.55056900 | 0.63409400  | 0.19237400  |
| H | -9.24096200 | -0.96161600 | 0.54671500  |
| C | -3.92340300 | 2.55436200  | -1.76078000 |
| C | -5.08508300 | 3.45328900  | -2.21830600 |
| C | -3.26802400 | 1.83779100  | -2.95705300 |
| H | -3.16709600 | 3.21390800  | -1.32602300 |
| H | -5.55741900 | 3.95115900  | -1.36578100 |
| H | -4.71980600 | 4.22334300  | -2.90611300 |
| H | -5.85903600 | 2.88545900  | -2.74513900 |
| H | -2.37690000 | 1.29107600  | -2.63718400 |
| H | -3.96681900 | 1.12876500  | -3.41644200 |
| H | -2.96661200 | 2.55852500  | -3.72520200 |
| C | 3.11453900  | -0.13647600 | -3.16109000 |
| C | 2.63252900  | -1.51466000 | -3.64927900 |
| C | 3.80742800  | 0.61003900  | -4.31738900 |
| H | 2.22427400  | 0.42987900  | -2.87020300 |
| H | 2.27979600  | -2.13879700 | -2.82764400 |
| H | 1.81411800  | -1.38731400 | -4.36593100 |
| H | 3.43041100  | -2.05968900 | -4.16674300 |
| H | 4.06465000  | 1.63676900  | -4.04734800 |
| H | 4.73158000  | 0.09532800  | -4.60386900 |
| H | 3.15456200  | 0.64668200  | -5.19667100 |
| C | 4.60408300  | 1.48150700  | 1.47958700  |
| C | 5.94942700  | 2.13944400  | 1.83253300  |
| C | 4.00514000  | 0.73728300  | 2.68525600  |
| H | 3.91453400  | 2.28927600  | 1.21798600  |
| H | 6.36152600  | 2.67998200  | 0.97431600  |
| H | 5.82240200  | 2.84992400  | 2.65658500  |
| H | 6.69051900  | 1.39743300  | 2.14758500  |
| H | 3.03365300  | 0.30625100  | 2.43289900  |
| H | 4.66022700  | -0.07838400 | 3.00857300  |
| H | 3.87341300  | 1.41728800  | 3.53464100  |
| C | 6.77677900  | -2.56810600 | -0.66959300 |
| C | 7.02330500  | -3.13073400 | 0.73912700  |
| C | 8.10138800  | -2.13040100 | -1.32556700 |
| H | 6.35820200  | -3.37968200 | -1.28138100 |
| H | 6.09127500  | -3.38594700 | 1.25227400  |
| H | 7.64319100  | -4.03138800 | 0.67832700  |
| H | 7.56432200  | -2.41213000 | 1.36517400  |
| H | 7.93989800  | -1.77803700 | -2.34926200 |
| H | 8.55414000  | -1.31021600 | -0.75700600 |
| H | 8.81699500  | -2.95961900 | -1.35464200 |
| C | -3.85484400 | -2.23507000 | -2.24413000 |
| C | -1.55210200 | -4.71858200 | -0.48223200 |
| C | -2.33366400 | -2.01706400 | -2.06507000 |
| H | -4.41014100 | -1.37207300 | -1.88113600 |
| H | -0.93700600 | -4.77209000 | -1.38226800 |
| H | -4.07165500 | -2.39043200 | -3.30587800 |
| H | -1.05077600 | -5.30382400 | 0.29100200  |
| C | -4.26750200 | -3.43839100 | -1.43232700 |
| O | -5.03711000 | -3.44309400 | -0.50241700 |

|   |             |             |             |
|---|-------------|-------------|-------------|
| C | -1.52856800 | -3.28854800 | 0.02443000  |
| O | -1.07522300 | -3.04755500 | 1.14525100  |
| O | -3.53932500 | -4.53060300 | -1.81396800 |
| O | -2.00783600 | -2.23995500 | -0.64201700 |
| O | 1.27600000  | -3.51958000 | -1.10277300 |
| H | 1.02441700  | -2.57454900 | -1.07164800 |
| O | 2.05955900  | -2.26066800 | 2.66938400  |
| C | 1.84272700  | -2.49161100 | 4.09171300  |
| H | 2.10872800  | -3.53540900 | 4.29317500  |
| C | 0.35342100  | -2.25866600 | 4.29972800  |
| H | -0.23393100 | -2.92713300 | 3.66540300  |
| H | 0.08460600  | -2.43203600 | 5.34648200  |
| H | 0.09568300  | -1.22924300 | 4.03411900  |
| C | 3.10570900  | -2.87125900 | 2.07111300  |
| O | 3.99046700  | -3.45060800 | 2.67203700  |
| C | 2.72719200  | -1.57610300 | 4.92712500  |
| H | 3.77929100  | -1.76010200 | 4.70307800  |
| H | 2.49473400  | -0.52742800 | 4.72364500  |
| H | 2.55739200  | -1.76893300 | 5.99159200  |
| C | 0.99476400  | 3.15364700  | -0.40872100 |
| C | 1.38127400  | 4.21240400  | -1.30009300 |
| C | -4.01871200 | 0.40843200  | 1.44882900  |
| C | -3.26779600 | 0.21775500  | 2.76422000  |
| C | -3.14470100 | -1.25841400 | 3.17560300  |
| C | -3.93249100 | 1.02107900  | 3.89938400  |
| H | -2.25214100 | 0.60118500  | 2.62546400  |
| H | -2.77163200 | -1.87468700 | 2.35688000  |
| H | -2.45178200 | -1.35441200 | 4.01707400  |
| H | -4.10649900 | -1.67073400 | 3.49944500  |
| H | -3.94744300 | 2.09227300  | 3.68520400  |
| H | -4.96747800 | 0.69177400  | 4.04530600  |
| H | -3.39294400 | 0.87308600  | 4.84141500  |
| C | 2.93716800  | -2.81852800 | 0.57412500  |
| H | 3.88920100  | -3.02543600 | 0.09018300  |
| H | 2.61787400  | -1.81552300 | 0.28321500  |
| C | -2.94681100 | -5.31139700 | -0.74857300 |
| O | 0.49766800  | -0.87972000 | -1.11796200 |
| O | -0.29749200 | -0.55519600 | 1.37040300  |
| H | -0.62829400 | -1.50745400 | 1.32022900  |
| C | -5.47270700 | 0.74603600  | -0.92036200 |
| H | -6.02717500 | 0.87860100  | -1.84328800 |
| C | -2.87396100 | -6.75467400 | -1.21586600 |
| H | -2.41645800 | -7.38214500 | -0.44550600 |
| H | -3.87825500 | -7.13132200 | -1.42395200 |
| H | -2.27566600 | -6.83209300 | -2.12874100 |
| H | -3.58101800 | -5.22548400 | 0.13904600  |
| C | -1.44259100 | -2.74047700 | -3.06268500 |
| H | -1.56856500 | -2.24184600 | -4.02933000 |
| H | -0.39585700 | -2.65484600 | -2.77493600 |
| H | -1.71544300 | -3.78729000 | -3.18675700 |
| H | -2.12728300 | -0.94916200 | -2.13612400 |
| C | 2.46164400  | -5.25175300 | 0.02215200  |
| H | 1.68212500  | -5.98536500 | -0.20584700 |
| H | 3.19619900  | -5.26775000 | -0.78930000 |
| H | 2.96106700  | -5.54074100 | 0.95170900  |
| C | 1.86674400  | -3.85669900 | 0.15037100  |
| H | 1.08842000  | -3.86378700 | 0.92417400  |

**<sup>4</sup>TS1**

|   |             |            |             |
|---|-------------|------------|-------------|
| C | -0.35325500 | 6.93595000 | -2.55954200 |
| C | 0.79505500  | 6.20076000 | -2.37966600 |
| C | 0.79647700  | 5.03466600 | -1.56772800 |
| C | -1.58405000 | 5.40855400 | -1.13154200 |

|   |             |             |             |
|---|-------------|-------------|-------------|
| C | -1.55581000 | 6.52434000  | -1.93801500 |
| H | 2.86839000  | 4.54619800  | -1.94307500 |
| H | -0.34390100 | 7.82200700  | -3.18720900 |
| H | 1.72059900  | 6.49199700  | -2.86936400 |
| C | 1.95990600  | 4.23522100  | -1.43680100 |
| H | -2.51404200 | 5.10371800  | -0.66762200 |
| H | -2.46735300 | 7.09142600  | -2.10203300 |
| C | 0.77037200  | 2.71375000  | -0.02812600 |
| C | 1.96235000  | 3.05698200  | -0.72074300 |
| C | -1.57419800 | 3.04845000  | 0.72355500  |
| C | -2.21026700 | 3.92832500  | 1.66340100  |
| C | -2.10869800 | 1.77959000  | 0.54032500  |
| C | -1.64099000 | 5.16919500  | 2.06208000  |
| C | -3.45357300 | 3.53364700  | 2.25204800  |
| C | -3.37552500 | 1.39799600  | 1.05844900  |
| C | -2.28028800 | 5.98192900  | 2.97103600  |
| H | -0.68419100 | 5.46687100  | 1.64994000  |
| C | -4.09529200 | 4.40211700  | 3.17516200  |
| C | -4.02412700 | 2.28886400  | 1.88831700  |
| C | -3.52506700 | 5.60303600  | 3.52772600  |
| H | -1.82187700 | 6.92047800  | 3.26816000  |
| H | -5.04331200 | 4.09152300  | 3.60635000  |
| H | -5.00766000 | 2.02903900  | 2.26866400  |
| H | -4.02043100 | 6.25642600  | 4.23964800  |
| O | -1.43839000 | 0.85783900  | -0.25968400 |
| O | 0.78585200  | 1.57696100  | 0.76969700  |
| P | 0.00507800  | 0.24327300  | 0.24204400  |
| C | -4.08923100 | 0.14989900  | 0.63433200  |
| C | -4.87997800 | 0.18638400  | -0.53682200 |
| C | -4.92231700 | -2.06538200 | 1.11682500  |
| C | -5.75404100 | -2.03479600 | -0.00317600 |
| H | -4.92260000 | -2.95575100 | 1.73560300  |
| C | 3.17098200  | 2.17631700  | -0.69127600 |
| C | 3.96297600  | 2.09299700  | 0.47118200  |
| C | 3.54014500  | 1.45731200  | -1.85490300 |
| C | 5.13418000  | 1.32259400  | 0.44469100  |
| C | 4.72200000  | 0.71446300  | -1.83090400 |
| C | 5.54136000  | 0.63564200  | -0.69773100 |
| H | 5.72315000  | 1.25521300  | 1.35064200  |
| H | 5.01970800  | 0.17423600  | -2.72573900 |
| C | -6.71208800 | -3.18289100 | -0.28530100 |
| C | -6.58983600 | -3.73723900 | -1.71411100 |
| C | -8.16160700 | -2.75270900 | 0.01080600  |
| H | -6.45069500 | -3.99668700 | 0.40145000  |
| H | -5.58091800 | -4.11145400 | -1.90056100 |
| H | -7.29007600 | -4.56626600 | -1.86330500 |
| H | -6.81998300 | -2.97423500 | -2.46569700 |
| H | -8.26310500 | -2.39328200 | 1.03953300  |
| H | -8.46859000 | -1.94000800 | -0.65731300 |
| H | -8.85605200 | -3.58819600 | -0.13238900 |
| C | -4.81905500 | 1.36573400  | -1.50404300 |
| C | -6.19960000 | 1.81054000  | -2.01337300 |
| C | -3.87408500 | 1.03543400  | -2.67717500 |
| H | -4.38796600 | 2.21804600  | -0.97073900 |
| H | -6.88321800 | 2.01019500  | -1.18232500 |
| H | -6.10495600 | 2.72574200  | -2.60732400 |
| H | -6.66368800 | 1.05467100  | -2.65581200 |
| H | -2.87067700 | 0.79936800  | -2.31252300 |
| H | -4.25042200 | 0.17294400  | -3.24038900 |
| H | -3.79740800 | 1.88317900  | -3.36727400 |
| C | 2.70742800  | 1.49236700  | -3.13593000 |
| C | 2.45648600  | 0.09583700  | -3.73067600 |
| C | 3.36399500  | 2.40696700  | -4.18782300 |

|   |             |             |             |
|---|-------------|-------------|-------------|
| H | 1.72765900  | 1.90765600  | -2.88705000 |
| H | 1.98170500  | -0.55429900 | -2.99602500 |
| H | 1.78993100  | 0.17509300  | -4.59651300 |
| H | 3.38184100  | -0.37715800 | -4.07777700 |
| H | 3.49533800  | 3.42546600  | -3.81246000 |
| H | 4.35327400  | 2.02630100  | -4.46640300 |
| H | 2.75231500  | 2.45637200  | -5.09551400 |
| C | 3.59909900  | 2.82883400  | 1.75739500  |
| C | 4.70847100  | 3.81284000  | 2.17305100  |
| C | 3.26607300  | 1.84636100  | 2.89534200  |
| H | 2.70301500  | 3.42588900  | 1.56616700  |
| H | 4.93400100  | 4.51973600  | 1.36775700  |
| H | 4.39904800  | 4.38459500  | 3.05463900  |
| H | 5.63551300  | 3.28857100  | 2.42835000  |
| H | 2.42116400  | 1.21119700  | 2.62113500  |
| H | 4.11205300  | 1.19329500  | 3.12379900  |
| H | 2.99861100  | 2.39934700  | 3.80298300  |
| C | 6.82535100  | -0.18629400 | -0.76792100 |
| C | 7.51125200  | -0.40261100 | 0.58703200  |
| C | 7.81787200  | 0.44287700  | -1.76682200 |
| H | 6.54580900  | -1.17558000 | -1.16114500 |
| H | 6.82123400  | -0.79949700 | 1.33465300  |
| H | 8.34891000  | -1.09941900 | 0.47816100  |
| H | 7.91681500  | 0.53788600  | 0.97691700  |
| H | 7.37657800  | 0.55849100  | -2.76087900 |
| H | 8.12323900  | 1.43647300  | -1.42063800 |
| H | 8.71729800  | -0.17534200 | -1.86350600 |
| C | -2.90053200 | -3.13532100 | -1.92883100 |
| C | 0.31227100  | -4.83296700 | -0.52992000 |
| C | -1.48748600 | -2.50953200 | -1.97612400 |
| H | -3.61797100 | -2.44899200 | -1.48076200 |
| H | 0.69382200  | -4.88148700 | -1.54924600 |
| H | -3.23330200 | -3.37424200 | -2.94464700 |
| H | 1.07512500  | -5.22447800 | 0.14641700  |
| C | -2.86937400 | -4.38742100 | -1.07725100 |
| O | -3.58381400 | -4.63372800 | -0.13760100 |
| C | 0.07229400  | -3.38467800 | -0.12911200 |
| O | 0.24102500  | -3.16592600 | 1.15443500  |
| O | -1.84103500 | -5.20408800 | -1.46791500 |
| O | -0.95035100 | -2.66741300 | -0.61131000 |
| O | 1.47883900  | -2.58169700 | -0.93427900 |
| H | 1.17751300  | -1.55158500 | -0.96984800 |
| O | 4.80218500  | -3.18900400 | 1.41849500  |
| C | 5.89124500  | -3.60216800 | 2.29774300  |
| H | 6.48852400  | -2.71605000 | 2.52795900  |
| C | 6.70676100  | -4.60340900 | 1.49597300  |
| H | 7.09061300  | -4.14275000 | 0.58129200  |
| H | 7.55550800  | -4.95708100 | 2.08885300  |
| H | 6.09379900  | -5.46715200 | 1.21958600  |
| C | 4.25164500  | -1.97122700 | 1.63037800  |
| O | 4.64178900  | -1.20134100 | 2.48277700  |
| C | 5.29936900  | -4.16936800 | 3.58149400  |
| H | 4.71620000  | -3.40342100 | 4.09744500  |
| H | 4.65083300  | -5.02261300 | 3.35837300  |
| H | 6.09834700  | -4.50550200 | 4.24968600  |
| C | -0.38254500 | 3.47701200  | -0.05895100 |
| C | -0.40924400 | 4.64074000  | -0.90156500 |
| C | -4.08055100 | -0.99877300 | 1.45027200  |
| C | -3.18984500 | -1.08400200 | 2.68466400  |
| C | -2.57567400 | -2.48171900 | 2.86776900  |
| C | -3.95305700 | -0.66110900 | 3.95372800  |
| H | -2.35688200 | -0.39013500 | 2.54034500  |
| H | -2.16569000 | -2.85826300 | 1.92963300  |

|   |             |             |             |
|---|-------------|-------------|-------------|
| H | -1.76770300 | -2.44067300 | 3.60491800  |
| H | -3.31331400 | -3.20798900 | 3.22667400  |
| H | -4.30943900 | 0.37005400  | 3.88260700  |
| H | -4.82173900 | -1.30984100 | 4.11528800  |
| H | -3.30533600 | -0.73455600 | 4.83436800  |
| C | 3.08609800  | -1.68756800 | 0.70510600  |
| H | 3.27392000  | -0.72219700 | 0.22600300  |
| H | 2.22034500  | -1.54098500 | 1.35555800  |
| C | -0.95841100 | -5.69326400 | -0.42947200 |
| O | 0.65313100  | -0.28090800 | -1.02929500 |
| O | -0.11066600 | -0.66590300 | 1.44009500  |
| H | 0.01592200  | -2.17592800 | 1.34850800  |
| C | -5.69941300 | -0.90875800 | -0.83039800 |
| H | -6.31844600 | -0.87757800 | -1.72165300 |
| C | -0.68459900 | -7.16549700 | -0.68548100 |
| H | -0.00531200 | -7.56735700 | 0.07224600  |
| H | -1.62081200 | -7.72729600 | -0.65058600 |
| H | -0.23136900 | -7.30599900 | -1.67176700 |
| H | -1.44740100 | -5.55739700 | 0.54014800  |
| C | -0.61282500 | -2.99066300 | -3.12452900 |
| H | -1.05631900 | -2.60357800 | -4.04762700 |
| H | 0.39911500  | -2.59579600 | -3.04376900 |
| H | -0.58498900 | -4.07770300 | -3.19364500 |
| H | -1.57830700 | -1.42401600 | -2.04215200 |
| C | 3.80233300  | -2.83446000 | -1.47176900 |
| H | 3.52895000  | -3.62006300 | -2.18160500 |
| H | 3.82926500  | -1.87867500 | -1.99882700 |
| H | 4.79718900  | -3.04578600 | -1.07428800 |
| C | 2.79000500  | -2.77599600 | -0.33471300 |
| H | 2.74666400  | -3.74100600 | 0.17488700  |

**<sup>4</sup>INT2**

|   |             |            |             |
|---|-------------|------------|-------------|
| C | -0.76038400 | 6.89718300 | -2.64452200 |
| C | 0.42303900  | 6.22388400 | -2.45128100 |
| C | 0.48222800  | 5.07546500 | -1.61650400 |
| C | -1.91457800 | 5.33924200 | -1.18588900 |
| C | -1.94130000 | 6.43853000 | -2.01468900 |
| H | 2.57400600  | 4.68096600 | -1.99256800 |
| H | -0.79501500 | 7.76984800 | -3.28966600 |
| H | 1.33276200  | 6.55071800 | -2.94785400 |
| C | 1.68401400  | 4.33631900 | -1.47583700 |
| H | -2.82879700 | 4.99772800 | -0.71647500 |
| H | -2.87991700 | 6.95559500 | -2.19020900 |
| C | 0.57373600  | 2.79439100 | -0.03353700 |
| C | 1.74673100  | 3.17339200 | -0.73773300 |
| C | -1.78934500 | 3.01669600 | 0.71436000  |
| C | -2.48515700 | 3.87550900 | 1.63159500  |
| C | -2.25314000 | 1.71843900 | 0.55849000  |
| C | -1.99494700 | 5.15627400 | 2.00715800  |
| C | -3.70550800 | 3.41523400 | 2.22226300  |
| C | -3.49447600 | 1.26351900 | 1.07446900  |
| C | -2.68814000 | 5.94592600 | 2.89671000  |
| H | -1.05598000 | 5.50388200 | 1.59309900  |
| C | -4.40403100 | 4.26145900 | 3.12469500  |
| C | -4.19877300 | 2.13002700 | 1.88411900  |
| C | -3.91026100 | 5.50185800 | 3.45516200  |
| H | -2.29014700 | 6.91656900 | 3.17700300  |
| H | -5.33347400 | 3.90222500 | 3.55818500  |
| H | -5.16511600 | 1.81786200 | 2.26875500  |
| H | -4.44881000 | 6.13746700 | 4.15153100  |
| O | -1.51528600 | 0.81454000 | -0.21736000 |
| O | 0.65723300  | 1.67297000 | 0.79190000  |
| P | -0.07820400 | 0.30205200 | 0.34826600  |

|   |             |             |             |
|---|-------------|-------------|-------------|
| C | -4.10887300 | -0.03961200 | 0.66134900  |
| C | -4.88968300 | -0.07548500 | -0.51527500 |
| C | -4.70565500 | -2.33346600 | 1.11799400  |
| C | -5.52258700 | -2.38338100 | -0.01304400 |
| H | -4.61151400 | -3.22699600 | 1.72456400  |
| C | 2.99055100  | 2.34212600  | -0.69934700 |
| C | 3.78488200  | 2.30026800  | 0.46391200  |
| C | 3.38602300  | 1.62030800  | -1.85350400 |
| C | 4.98562200  | 1.57695700  | 0.44404700  |
| C | 4.59195300  | 0.91756000  | -1.81923100 |
| C | 5.41775400  | 0.88869200  | -0.68821000 |
| H | 5.57842700  | 1.54691300  | 1.34921900  |
| H | 4.90353500  | 0.37058000  | -2.70457800 |
| C | -6.33806900 | -3.63409400 | -0.30661500 |
| C | -6.29727200 | -4.06539700 | -1.78052200 |
| C | -7.79254900 | -3.43644800 | 0.16290400  |
| H | -5.89362900 | -4.44668500 | 0.27885100  |
| H | -5.27039800 | -4.24036100 | -2.10935000 |
| H | -6.85883400 | -4.99553000 | -1.91823700 |
| H | -6.74608200 | -3.31376100 | -2.43914300 |
| H | -7.83138800 | -3.17371100 | 1.22470400  |
| H | -8.27240200 | -2.62640900 | -0.39848300 |
| H | -8.38139900 | -4.34834300 | 0.01228400  |
| C | -4.93792400 | 1.10660200  | -1.47998100 |
| C | -6.35607000 | 1.43044700  | -1.97741700 |
| C | -3.97737000 | 0.85915800  | -2.66078700 |
| H | -4.57891200 | 1.99344100  | -0.94928800 |
| H | -7.04542800 | 1.57691600  | -1.14004100 |
| H | -6.34566600 | 2.34643200  | -2.57777800 |
| H | -6.76099600 | 0.63329900  | -2.60958300 |
| H | -2.95628800 | 0.69547800  | -2.30488700 |
| H | -4.28769800 | -0.02674200 | -3.22712300 |
| H | -3.97068800 | 1.71478500  | -3.34551700 |
| C | 2.55556900  | 1.60796800  | -3.13681600 |
| C | 2.37756900  | 0.19885800  | -3.72916600 |
| C | 3.16986900  | 2.54657900  | -4.19352000 |
| H | 1.55590900  | 1.97807500  | -2.89427300 |
| H | 1.95947700  | -0.48735900 | -2.99249100 |
| H | 1.69241900  | 0.23704700  | -4.58272300 |
| H | 3.32337300  | -0.21753700 | -4.09226300 |
| H | 3.25016600  | 3.57289200  | -3.82577500 |
| H | 4.17749100  | 2.21226600  | -4.46513500 |
| H | 2.55985100  | 2.55904300  | -5.10348100 |
| C | 3.39545700  | 3.02897800  | 1.74662900  |
| C | 4.45514300  | 4.07539700  | 2.13917900  |
| C | 3.13089700  | 2.04003900  | 2.89736500  |
| H | 2.46609300  | 3.57516400  | 1.56176000  |
| H | 4.63073200  | 4.78670000  | 1.32540900  |
| H | 4.12742300  | 4.63677000  | 3.02075000  |
| H | 5.41254500  | 3.60390100  | 2.38477500  |
| H | 2.31935500  | 1.35572700  | 2.64104200  |
| H | 4.01312300  | 1.43494500  | 3.12143300  |
| H | 2.84511300  | 2.58557800  | 3.80377000  |
| C | 6.72947400  | 0.10927800  | -0.74290000 |
| C | 7.46285400  | 0.01642900  | 0.60120200  |
| C | 7.67110800  | 0.69715500  | -1.81362400 |
| H | 6.47468500  | -0.91516400 | -1.05435700 |
| H | 6.81544000  | -0.36144000 | 1.39499700  |
| H | 8.32854400  | -0.64806300 | 0.51185600  |
| H | 7.83449700  | 0.99896900  | 0.91375700  |
| H | 7.20333600  | 0.72379300  | -2.80173600 |
| H | 7.94997600  | 1.72317500  | -1.54946800 |
| H | 8.58906100  | 0.10410400  | -1.88969100 |

|   |             |             |             |
|---|-------------|-------------|-------------|
| C | -2.60566500 | -3.29754400 | -1.97543700 |
| C | 0.70345400  | -4.85696400 | -0.59955000 |
| C | -1.22280400 | -2.59892900 | -1.96911900 |
| H | -3.37280400 | -2.65285600 | -1.54784000 |
| H | 1.06120600  | -4.91273400 | -1.62901300 |
| H | -2.89615800 | -3.55675500 | -2.99959800 |
| H | 1.49003900  | -5.24642200 | 0.05246200  |
| C | -2.52164400 | -4.54351400 | -1.11856000 |
| O | -3.23909300 | -4.82247200 | -0.18873400 |
| C | 0.48186600  | -3.38684300 | -0.20143700 |
| O | 0.48991900  | -3.32293700 | 1.16934900  |
| O | -1.45575400 | -5.31087900 | -1.49739900 |
| O | -0.71141700 | -2.78589900 | -0.61321700 |
| O | 1.54449700  | -2.55191100 | -0.77063100 |
| H | 0.99728400  | -1.09751000 | -0.90990800 |
| O | 5.04384400  | -2.89352200 | 1.40843600  |
| C | 6.18301000  | -3.22048900 | 2.26007300  |
| H | 6.66734900  | -2.28343600 | 2.54528900  |
| C | 7.11086500  | -4.06175300 | 1.39892800  |
| H | 7.43017300  | -3.50041900 | 0.51614700  |
| H | 7.99991900  | -4.34487700 | 1.97025000  |
| H | 6.60704500  | -4.97505400 | 1.06711500  |
| C | 4.36409200  | -1.75469500 | 1.67234300  |
| O | 4.68514400  | -0.96793000 | 2.53887100  |
| C | 5.67198400  | -3.93369300 | 3.50502400  |
| H | 5.00105100  | -3.27841300 | 4.06530100  |
| H | 5.13179300  | -4.84478400 | 3.22886700  |
| H | 6.50927100  | -4.20858200 | 4.15405500  |
| C | -0.61831300 | 3.49324900  | -0.07352600 |
| C | -0.70287800 | 4.63658200  | -0.94083300 |
| C | -3.98908200 | -1.18655500 | 1.47164600  |
| C | -3.11200800 | -1.18784000 | 2.71823500  |
| C | -2.37354100 | -2.52182400 | 2.91625400  |
| C | -3.93255000 | -0.83006000 | 3.97165600  |
| H | -2.34547000 | -0.41905800 | 2.58577200  |
| H | -1.92301900 | -2.86762800 | 1.98483300  |
| H | -1.58050900 | -2.40152600 | 3.66094000  |
| H | -3.04564100 | -3.30871000 | 3.27626400  |
| H | -4.38451100 | 0.16234500  | 3.88639900  |
| H | -4.73869900 | -1.55687100 | 4.12360500  |
| H | -3.29606400 | -0.83660900 | 4.86344800  |
| C | 3.15286400  | -1.57886600 | 0.78005000  |
| H | 3.26159500  | -0.61526900 | 0.27148200  |
| H | 2.29817400  | -1.47803600 | 1.45290900  |
| C | -0.54434800 | -5.73267500 | -0.44909600 |
| O | 0.60043500  | -0.16944400 | -0.99063500 |
| O | -0.07691000 | -0.64193200 | 1.49525000  |
| H | 0.18889000  | -2.41680100 | 1.41560300  |
| C | -5.58658300 | -1.24851700 | -0.82587000 |
| H | -6.19299300 | -1.27456100 | -1.72546300 |
| C | -0.25710600 | -7.21301400 | -0.63840700 |
| H | 0.43580700  | -7.57124500 | 0.12916500  |
| H | -1.18574400 | -7.78418700 | -0.56676200 |
| H | 0.18746300  | -7.39580100 | -1.62206200 |
| H | -1.02004300 | -5.55424300 | 0.51952300  |
| C | -0.31930700 | -3.01370900 | -3.12650100 |
| H | -0.75983700 | -2.61936500 | -4.04799400 |
| H | 0.68111400  | -2.59385200 | -3.02138600 |
| H | -0.25313600 | -4.09755900 | -3.21957100 |
| H | -1.37913300 | -1.51868600 | -2.03298600 |
| C | 3.84012000  | -2.71500600 | -1.41223700 |
| H | 3.58761100  | -3.53014100 | -2.09593700 |
| H | 3.77264400  | -1.76924800 | -1.95523400 |

|   |            |             |             |
|---|------------|-------------|-------------|
| H | 4.86673900 | -2.84770600 | -1.06578600 |
| C | 2.88740100 | -2.70710200 | -0.22546200 |
| H | 2.93272700 | -3.66059900 | 0.30294700  |

**4INT3**

|   |             |             |             |
|---|-------------|-------------|-------------|
| C | -1.74730200 | 7.34307100  | -1.88241700 |
| C | -0.50788500 | 6.74748800  | -1.86461000 |
| C | -0.31455600 | 5.47773500  | -1.25669600 |
| C | -2.69652300 | 5.45575800  | -0.69006200 |
| C | -2.85339400 | 6.67907700  | -1.30267800 |
| H | 1.75145500  | 5.29430600  | -1.87574800 |
| H | -1.88347300 | 8.31077100  | -2.35572700 |
| H | 0.34468500  | 7.23138400  | -2.33361700 |
| C | 0.93814700  | 4.81658900  | -1.33724000 |
| H | -3.55652500 | 4.95755700  | -0.26063700 |
| H | -3.83817600 | 7.13452600  | -1.34669300 |
| C | 0.04095000  | 2.97454500  | -0.10965300 |
| C | 1.12329300  | 3.55005300  | -0.82851500 |
| C | -2.29005800 | 2.82919700  | 0.74557700  |
| C | -3.05935500 | 3.41932500  | 1.80639000  |
| C | -2.56975300 | 1.51507000  | 0.40344400  |
| C | -2.75167200 | 4.68754300  | 2.37033900  |
| C | -4.16576000 | 2.68707900  | 2.34841000  |
| C | -3.62972800 | 0.74764100  | 0.95779500  |
| C | -3.52258000 | 5.22174700  | 3.37848000  |
| H | -1.89198900 | 5.23364200  | 2.00119100  |
| C | -4.95189500 | 3.27594200  | 3.37539800  |
| C | -4.43634500 | 1.37466200  | 1.88338300  |
| C | -4.64359300 | 4.51826500  | 3.87858200  |
| H | -3.26388100 | 6.18961500  | 3.79737200  |
| H | -5.79502400 | 2.71410800  | 3.76847900  |
| H | -5.27939200 | 0.83505100  | 2.30247000  |
| H | -5.24757600 | 4.95420400  | 4.66863900  |
| O | -1.80304200 | 0.88728400  | -0.58217100 |
| O | 0.28348600  | 1.74350100  | 0.50732100  |
| P | -0.30629600 | 0.41053400  | -0.19432300 |
| C | -3.81484600 | -0.68195900 | 0.55723600  |
| C | -4.16598700 | -1.00537800 | -0.77151200 |
| C | -3.76544700 | -3.04236200 | 1.09021700  |
| C | -4.12315700 | -3.38390200 | -0.21676000 |
| H | -3.59932900 | -3.84142700 | 1.80824600  |
| C | 2.33787000  | 2.72428400  | -1.10612600 |
| C | 3.21765900  | 2.36813400  | -0.06068900 |
| C | 2.54045700  | 2.21577800  | -2.40944300 |
| C | 4.27555700  | 1.49938000  | -0.33366900 |
| C | 3.62298300  | 1.35587900  | -2.62982800 |
| C | 4.49236500  | 0.97254600  | -1.60989200 |
| H | 4.94423200  | 1.21822900  | 0.47391500  |
| H | 3.78652700  | 0.96087200  | -3.62911100 |
| C | -4.31216300 | -4.84989500 | -0.58851000 |
| C | -4.30710600 | -5.11086700 | -2.10119700 |
| C | -5.59974800 | -5.40690500 | 0.05076000  |
| H | -3.46688500 | -5.40158700 | -0.14971900 |
| H | -3.44522700 | -4.64585800 | -2.58789900 |
| H | -4.28577600 | -6.18684900 | -2.30101300 |
| H | -5.21243600 | -4.71101900 | -2.57116800 |
| H | -5.59587500 | -5.27577600 | 1.13702600  |
| H | -6.47620000 | -4.88200400 | -0.34493600 |
| H | -5.71539700 | -6.47486300 | -0.16613500 |
| C | -4.41989800 | 0.04950300  | -1.84477100 |
| C | -5.90718700 | 0.07276900  | -2.24586800 |
| C | -3.51206500 | -0.15213800 | -3.07243500 |
| H | -4.19252400 | 1.03359000  | -1.42830100 |



|   |             |             |             |
|---|-------------|-------------|-------------|
| H | -6.54790800 | 0.26227500  | -1.37826600 |
| H | -6.09320500 | 0.85743200  | -2.98764100 |
| H | -6.21399600 | -0.88243200 | -2.68567800 |
| H | -2.46277900 | -0.22002200 | -2.78103500 |
| H | -3.76185500 | -1.07260300 | -3.60960700 |
| H | -3.63309400 | 0.68432400  | -3.76999100 |
| C | 1.63873100  | 2.57183500  | -3.59029300 |
| C | 1.08303800  | 1.33276800  | -4.31287300 |
| C | 2.37939100  | 3.50273000  | -4.56884700 |
| H | 0.77459700  | 3.12108500  | -3.21001100 |
| H | 0.51862800  | 0.71386800  | -3.61384400 |
| H | 0.41779600  | 1.63964500  | -5.12741100 |
| H | 1.87971400  | 0.72259600  | -4.75260000 |
| H | 2.72772600  | 4.41180400  | -4.06733400 |
| H | 3.25682700  | 3.00457600  | -4.99598400 |
| H | 1.72319100  | 3.79758000  | -5.39512700 |
| C | 3.06461600  | 2.92918700  | 1.34922100  |
| C | 4.24112500  | 3.86345400  | 1.69060400  |
| C | 2.92295700  | 1.81646200  | 2.39814600  |
| H | 2.15370600  | 3.53409900  | 1.38113400  |
| H | 4.32763300  | 4.67505900  | 0.96106800  |
| H | 4.10733700  | 4.30613500  | 2.68383000  |
| H | 5.19015500  | 3.31539300  | 1.69290000  |
| H | 2.07678800  | 1.16360000  | 2.17702200  |
| H | 3.82163000  | 1.19729900  | 2.43801900  |
| H | 2.77431900  | 2.23938600  | 3.39736600  |
| C | 5.63911000  | 0.01160600  | -1.88008700 |
| C | 5.53413500  | -1.24859400 | -1.00332900 |
| C | 7.00481400  | 0.70033000  | -1.70789100 |
| H | 5.55657700  | -0.30445200 | -2.92876200 |
| H | 4.54592200  | -1.70351900 | -1.10166900 |
| H | 6.29470100  | -1.98386500 | -1.29037600 |
| H | 5.68312800  | -1.01595500 | 0.05475300  |
| H | 7.09577300  | 1.57197700  | -2.36367700 |
| H | 7.14091400  | 1.04461900  | -0.67682100 |
| H | 7.82180200  | 0.00774000  | -1.93863800 |
| C | 0.99821500  | -2.48558800 | -3.44503500 |
| C | 0.05251800  | -5.32930900 | -0.07680800 |
| C | 2.34165500  | -2.47510600 | -2.67494500 |
| H | 0.64149800  | -1.46566100 | -3.58591000 |
| H | 0.98076400  | -5.88500400 | -0.22999800 |
| H | 1.15405600  | -2.92045000 | -4.44093100 |
| H | -0.57696700 | -5.91585200 | 0.60499200  |
| C | -0.15222600 | -3.22342100 | -2.79129100 |
| O | -1.30164700 | -2.83949500 | -2.78850700 |
| C | 0.35507100  | -4.02259400 | 0.62288300  |
| O | -0.40180200 | -3.06159800 | 0.56019100  |
| O | 0.25059700  | -4.39532100 | -2.23794500 |
| O | 2.14839400  | -2.20521200 | -1.28892100 |
| O | 1.46636000  | -4.09636900 | 1.33900600  |
| H | 1.64746100  | -1.36655700 | -1.23347000 |
| O | 5.19829600  | -1.44051500 | 2.51100600  |
| C | 5.96832000  | -0.56434500 | 3.39314700  |
| H | 5.31918900  | 0.26267600  | 3.69259900  |
| C | 7.13712800  | -0.05771200 | 2.56438000  |
| H | 6.78707900  | 0.51405400  | 1.70153900  |
| H | 7.77156200  | 0.59246600  | 3.17408400  |
| H | 7.74268000  | -0.89313500 | 2.20016200  |
| C | 3.90127900  | -1.64498800 | 2.82303100  |
| O | 3.32688200  | -1.07666600 | 3.73016900  |
| C | 6.39098500  | -1.35610500 | 4.62487300  |
| H | 5.51163100  | -1.70176700 | 5.17297800  |
| H | 6.99523000  | -2.22094700 | 4.33308200  |

|   |             |             |             |
|---|-------------|-------------|-------------|
| H | 6.98662300  | -0.72522700 | 5.29192800  |
| C | -1.20649000 | 3.56005500  | 0.02756400  |
| C | -1.42258500 | 4.82802500  | -0.61823900 |
| C | -3.60312200 | -1.71801800 | 1.50316700  |
| C | -3.23378400 | -1.44440800 | 2.96165800  |
| C | -2.06022700 | -2.30117600 | 3.46965600  |
| C | -4.46094300 | -1.64364300 | 3.87297700  |
| H | -2.91817500 | -0.40136800 | 3.04407300  |
| H | -1.18044500 | -2.17610400 | 2.83970400  |
| H | -1.79603000 | -2.00341000 | 4.48992500  |
| H | -2.31130900 | -3.36725400 | 3.49505100  |
| H | -5.30153900 | -1.01540900 | 3.56448700  |
| H | -4.80058100 | -2.68493300 | 3.83734500  |
| H | -4.21769200 | -1.40142000 | 4.91352300  |
| C | 3.28803700  | -2.68111400 | 1.90462600  |
| H | 3.91123900  | -3.58178300 | 1.94147700  |
| H | 3.32376600  | -2.32240200 | 0.86962900  |
| C | -0.68242800 | -5.11031300 | -1.39458100 |
| O | 0.39264500  | -0.10312200 | -1.39760900 |
| O | -0.36221800 | -0.53516200 | 1.06474400  |
| H | -0.38203600 | -1.51320200 | 0.83348500  |
| C | -4.31843800 | -2.34871100 | -1.12702000 |
| H | -4.58105500 | -2.57966600 | -2.15180300 |
| C | -1.07017700 | -6.40941800 | -2.08344000 |
| H | -1.77455100 | -6.97571800 | -1.46617300 |
| H | -1.55050000 | -6.19579600 | -3.04057800 |
| H | -0.18667600 | -7.02886000 | -2.26684000 |
| H | -1.55181500 | -4.47261200 | -1.22907400 |
| H | 2.93600200  | -1.66234400 | -3.12562300 |
| C | 3.14814000  | -3.76463500 | -2.78604900 |
| H | 3.33758300  | -4.01078700 | -3.83600600 |
| H | 4.11046200  | -3.64387100 | -2.28180700 |
| H | 2.61036300  | -4.59241900 | -2.32338900 |
| C | 1.62381900  | -3.58222200 | 3.66457600  |
| H | 0.57430800  | -3.86262400 | 3.79031600  |
| H | 2.24439400  | -4.47004600 | 3.82324400  |
| H | 1.87794200  | -2.82528600 | 4.40632700  |
| C | 1.84426200  | -3.02476700 | 2.26575600  |
| H | 1.20991800  | -2.15551800 | 2.09609500  |

## Supplementary references

- 1 Tang, X.; Chen, E. Y. Chemical synthesis of perfectly isotactic and high melting bacterial poly(3-hydroxybutyrate) from bio-sourced racemic cyclic diolide. *Nat. Commun.* **2018**, *9*, 2345.
- 2 Schindler, A.; Harper, D. Poly (lactic acid). I. Stereosequence distribution in the polymerization of racemic dilactide. *Journal of Polymer Science: Polymer Letters Edition* **1976**, *14*, 729-734.
- 3 Gaussian 09, Revision D.01, M. J. Frisch, G. W. Trucks, H. B. Schlegel, G. E. Scuseria, M. A. Robb, J. R. Cheeseman, G. Scalmani, V. Barone, B. Mennucci, G. A. Petersson, H. Nakatsuji, M. Caricato, X. Li, H. P. Hratchian, A. F. Izmaylov, J. Bloino, G. Zheng, J. L. Sonnenberg, M. Hada, M. Ehara, K. Toyota, R. Fukuda, J.S Hasegawa, M. Ishida, T. Nakajima, Y. Honda, O. Kitao, H. Nakai, T. Vreven, J. A. Montgomery, Jr., J. E. Peralta, F. Ogliaro, M. Bearpark, J. J. Heyd, E. Brothers, K. N. Kudin, V. N. Staroverov, T. Keith, R. Kobayashi, J. Normand, K. Raghavachari, A. Rendell, J. C. Burant, S. S. Iyengar, J. Tomasi, M. Cossi, N. Rega, J. M. Millam, M. Klene, J. E. Knox, J. B. Cross, V. Bakken, C. Adamo, J. Jaramillo, R. Gomperts, R. E. Stratmann, O. Yazyev, A. J. Austin, R. Cammi, C. Pomelli, J. W. Ochterski, R. L. Martin, K. Morokuma, V. G. Zakrzewski, G. A. Voth, P. Salvador, J. J. Dannenberg, S. Dapprich, A. D. Daniels, O. Farkas, J. B. Foresman, J. V. Ortiz, J. Cioslowski, and D. J. Fox, Gaussian, Inc., Wallingford CT, 2013.
- 4 Elstner, M.; Hobza, P.; Frauenheim, T.; Suhai, S.; Kaxiras, E. Hydrogen bonding and stacking interactions of nucleic acid base pairs: A density-functional-theory based treatment. *J. Chem. Phys.* **2001**, *114*, 5149-5155.
- 5 Grimme, S. Accurate description of van der Waals complexes by density functional theory including empirical corrections. *J. Comput. Chem.* **2004**, *25*, 1463-1473.
- 6 Grimme, S. Semiempirical GGA-type density functional constructed with a long-range dispersion correction. *J. Comput. Chem.* **2006**, *27*, 1787-1799.
- 7 Grimme, S.; Antony, J.; Ehrlich, S.; Krieg, H. A consistent and accurate ab initio parametrization of density functional dispersion correction (DFT-D) for the 94 elements H-Pu. *J. Chem. Phys.* **2010**, *132*, 154104.
- 8 Stephens, P. J.; Devlin, F. J.; Chabalowski, C. F.; Frisch, M. J. Ab Initio Calculation of Vibrational Absorption and Circular Dichroism Spectra Using Density Functional Force Fields. *J. Phys. Chem.* **1994**, *98*, 11623-11627.
- 9 Becke, A. D. Density - functional thermochemistry. III. The role of exact exchange. *J. Chem. Phys.* **1993**, *98*, 5648-5652.
- 10 Davidson, E. R.; Feller, D. Basis set selection for molecular calculations. *Chem. Rev.* **1986**, *86*, 681-696.
- 11 Fukui, K. The path of chemical reactions - the IRC approach. *Acc. Chem. Res.* **1981**, *14*, 363-368.
- 12 Gonzalez, C.; Schlegel, H. B. Reaction path following in mass-weighted internal coordinates. *J. Phys. Chem. B* **1990**, *94*, 5523-5527.
- 13 Marenich, A. V.; Cramer, C. J.; Truhlar, D. G. Universal Solvation Model Based on Solute Electron Density and on a Continuum Model of the Solvent Defined by the Bulk Dielectric Constant and Atomic Surface Tensions. *J. Phys. Chem. B* **2009**, *113*, 6378-6396.
